# Supplementary material for: An extended research of crossmodal correspondence between color and sound in psychology and cognitive ergonomics
Source: PeerJ. 2018 Mar 1;6:e4443. doi: 10.7717/peerj.4443 (PMC5835347; doi:10.7717/peerj.4443)
Supplement: Dataset S2 [file peerj-06-4443-s002.xlsx]

## Sheet: Exp2
ExperimentName	Subjects	Groups	answer	Sounds	Colors	Pairings	Procedure	Exp2.ACC	Exp2.RT
Uexp2	A1	A	q	130.wav	black.jpg	Sound-Brightness	exp2	1	1672
Uexp2	A1	A	q	523.wav	white.jpg	Sound-Brightness	exp2	1	976
Uexp2	A1	A	q	523.wav	white.jpg	Sound-Brightness	exp2	1	704
Uexp2	A1	A	p	523.wav	cyan.jpg	Control	exp2	0	1845
Uexp2	A1	A	q	130.wav	cyan.jpg	Control	exp2	0	1818
Uexp2	A1	A	p	130.wav	red.jpg	Sound-Hue	exp2	1	808
Uexp2	A1	A	p	523.wav	blue.jpg	Sound-Hue	exp2	1	1091
Uexp2	A1	A	q	130.wav	black.jpg	Sound-Brightness	exp2	1	844
Uexp2	A1	A	p	130.wav	white.jpg	Sound-Brightness	exp2	1	870
Uexp2	A1	A	p	523.wav	cyan.jpg	Control	exp2	1	1805
Uexp2	A1	A	p	523.wav	cyan.jpg	Control	exp2	1	1713
Uexp2	A1	A	p	130.wav	green.jpg	Control	exp2	0	1808
Uexp2	A1	A	p	130.wav	white.jpg	Sound-Brightness	exp2	1	948
Uexp2	A1	A	p	130.wav	red.jpg	Sound-Hue	exp2	1	1014
Uexp2	A1	A	p	523.wav	cyan.jpg	Control	exp2	1	1929
Uexp2	A1	A	q	130.wav	red.jpg	Sound-Hue	exp2	1	801
Uexp2	A1	A	q	130.wav	cyan.jpg	Control	exp2	0	1885
Uexp2	A1	A	p	130.wav	red.jpg	Sound-Hue	exp2	1	985
Uexp2	A1	A	q	130.wav	black.jpg	Sound-Brightness	exp2	1	1019
Uexp2	A1	A	p	130.wav	white.jpg	Sound-Brightness	exp2	1	830
Uexp2	A1	A	q	523.wav	green.jpg	Control	exp2	1	2101
Uexp2	A1	A	p	523.wav	black.jpg	Sound-Brightness	exp2	1	806
Uexp2	A1	A	q	130.wav	red.jpg	Sound-Hue	exp2	1	875
Uexp2	A1	A	p	130.wav	white.jpg	Sound-Brightness	exp2	1	861
Uexp2	A1	A	p	130.wav	green.jpg	Control	exp2	1	2113
Uexp2	A1	A	q	130.wav	blue.jpg	Sound-Hue	exp2	1	912
Uexp2	A1	A	q	523.wav	green.jpg	Control	exp2	1	1970
Uexp2	A1	A	q	130.wav	blue.jpg	Sound-Hue	exp2	1	899
Uexp2	A1	A	p	523.wav	blue.jpg	Sound-Hue	exp2	1	801
Uexp2	A1	A	q	130.wav	black.jpg	Sound-Brightness	exp2	1	1114
Uexp2	A1	A	p	523.wav	blue.jpg	Sound-Hue	exp2	1	1353
Uexp2	A1	A	p	523.wav	black.jpg	Sound-Brightness	exp2	1	1075
Uexp2	A1	A	q	130.wav	blue.jpg	Sound-Hue	exp2	1	823
Uexp2	A1	A	q	523.wav	white.jpg	Sound-Brightness	exp2	1	728
Uexp2	A1	A	p	523.wav	black.jpg	Sound-Brightness	exp2	1	884
Uexp2	A1	A	q	130.wav	cyan.jpg	Control	exp2	1	2142
Uexp2	A1	A	p	130.wav	green.jpg	Control	exp2	1	1986
Uexp2	A1	A	p	130.wav	white.jpg	Sound-Brightness	exp2	0	919
Uexp2	A1	A	q	523.wav	green.jpg	Control	exp2	1	1857
Uexp2	A1	A	q	523.wav	white.jpg	Sound-Brightness	exp2	1	749
Uexp2	A1	A	p	130.wav	red.jpg	Sound-Hue	exp2	1	762
Uexp2	A1	A	q	130.wav	black.jpg	Sound-Brightness	exp2	1	993
Uexp2	A1	A	q	130.wav	red.jpg	Sound-Hue	exp2	1	814
Uexp2	A1	A	q	130.wav	cyan.jpg	Control	exp2	1	2119
Uexp2	A1	A	q	523.wav	green.jpg	Control	exp2	1	2159
Uexp2	A1	A	p	130.wav	green.jpg	Control	exp2	1	2098
Uexp2	A1	A	p	523.wav	blue.jpg	Sound-Hue	exp2	1	964
Uexp2	A1	A	q	130.wav	blue.jpg	Sound-Hue	exp2	1	880
Uexp2	A1	A	p	130.wav	green.jpg	Control	exp2	1	1891
Uexp2	A1	A	q	130.wav	red.jpg	Sound-Hue	exp2	1	1199
Uexp2	A1	A	p	523.wav	cyan.jpg	Control	exp2	1	1883
Uexp2	A1	A	p	523.wav	black.jpg	Sound-Brightness	exp2	1	869
Uexp2	A1	A	p	523.wav	blue.jpg	Sound-Hue	exp2	1	1013
Uexp2	A1	A	p	130.wav	red.jpg	Sound-Hue	exp2	1	857
Uexp2	A1	A	q	130.wav	blue.jpg	Sound-Hue	exp2	1	722
Uexp2	A1	A	q	523.wav	green.jpg	Control	exp2	0	1736
Uexp2	A1	A	p	523.wav	black.jpg	Sound-Brightness	exp2	1	1403
Uexp2	A1	A	q	130.wav	red.jpg	Sound-Hue	exp2	1	834
Uexp2	A1	A	q	130.wav	cyan.jpg	Control	exp2	1	2129
Uexp2	A1	A	q	523.wav	white.jpg	Sound-Brightness	exp2	1	783
Uexp2	A2	A	p	130.wav	red.jpg	Sound-Hue	exp2	1	813
Uexp2	A2	A	p	523.wav	cyan.jpg	Control	exp2	1	1914
Uexp2	A2	A	p	523.wav	black.jpg	Sound-Brightness	exp2	1	991
Uexp2	A2	A	q	130.wav	red.jpg	Sound-Hue	exp2	1	1742
Uexp2	A2	A	p	523.wav	black.jpg	Sound-Brightness	exp2	1	926
Uexp2	A2	A	p	130.wav	white.jpg	Sound-Brightness	exp2	1	793
Uexp2	A2	A	q	130.wav	cyan.jpg	Control	exp2	0	1919
Uexp2	A2	A	q	523.wav	white.jpg	Sound-Brightness	exp2	1	848
Uexp2	A2	A	p	130.wav	white.jpg	Sound-Brightness	exp2	1	611
Uexp2	A2	A	q	130.wav	cyan.jpg	Control	exp2	1	1967
Uexp2	A2	A	p	130.wav	red.jpg	Sound-Hue	exp2	1	862
Uexp2	A2	A	q	130.wav	blue.jpg	Sound-Hue	exp2	1	787
Uexp2	A2	A	q	130.wav	blue.jpg	Sound-Hue	exp2	1	683
Uexp2	A2	A	q	130.wav	black.jpg	Sound-Brightness	exp2	1	692
Uexp2	A2	A	q	523.wav	white.jpg	Sound-Brightness	exp2	1	800
Uexp2	A2	A	q	523.wav	white.jpg	Sound-Brightness	exp2	1	504
Uexp2	A2	A	p	130.wav	green.jpg	Control	exp2	1	2115
Uexp2	A2	A	q	130.wav	red.jpg	Sound-Hue	exp2	1	799
Uexp2	A2	A	p	523.wav	cyan.jpg	Control	exp2	0	2066
Uexp2	A2	A	p	523.wav	black.jpg	Sound-Brightness	exp2	1	808
Uexp2	A2	A	p	130.wav	green.jpg	Control	exp2	1	1977
Uexp2	A2	A	p	523.wav	blue.jpg	Sound-Hue	exp2	1	977
Uexp2	A2	A	q	130.wav	black.jpg	Sound-Brightness	exp2	0	826
Uexp2	A2	A	p	523.wav	black.jpg	Sound-Brightness	exp2	1	989
Uexp2	A2	A	q	523.wav	green.jpg	Control	exp2	1	1855
Uexp2	A2	A	q	130.wav	black.jpg	Sound-Brightness	exp2	1	861
Uexp2	A2	A	q	130.wav	cyan.jpg	Control	exp2	0	1859
Uexp2	A2	A	p	523.wav	cyan.jpg	Control	exp2	1	1972
Uexp2	A2	A	p	130.wav	green.jpg	Control	exp2	1	2021
Uexp2	A2	A	p	130.wav	red.jpg	Sound-Hue	exp2	1	998
Uexp2	A2	A	q	523.wav	white.jpg	Sound-Brightness	exp2	1	644
Uexp2	A2	A	p	130.wav	white.jpg	Sound-Brightness	exp2	1	643
Uexp2	A2	A	q	130.wav	black.jpg	Sound-Brightness	exp2	1	687
Uexp2	A2	A	p	523.wav	blue.jpg	Sound-Hue	exp2	1	781
Uexp2	A2	A	p	130.wav	red.jpg	Sound-Hue	exp2	1	782
Uexp2	A2	A	q	130.wav	cyan.jpg	Control	exp2	0	2021
Uexp2	A2	A	q	130.wav	blue.jpg	Sound-Hue	exp2	1	860
Uexp2	A2	A	q	523.wav	white.jpg	Sound-Brightness	exp2	1	688
Uexp2	A2	A	p	523.wav	blue.jpg	Sound-Hue	exp2	1	749
Uexp2	A2	A	p	130.wav	white.jpg	Sound-Brightness	exp2	1	1286
Uexp2	A2	A	p	523.wav	blue.jpg	Sound-Hue	exp2	1	768
Uexp2	A2	A	p	130.wav	green.jpg	Control	exp2	1	1990
Uexp2	A2	A	p	523.wav	black.jpg	Sound-Brightness	exp2	1	704
Uexp2	A2	A	p	523.wav	cyan.jpg	Control	exp2	0	2006
Uexp2	A2	A	q	523.wav	green.jpg	Control	exp2	1	1836
Uexp2	A2	A	q	130.wav	red.jpg	Sound-Hue	exp2	0	752
Uexp2	A2	A	q	130.wav	red.jpg	Sound-Hue	exp2	1	867
Uexp2	A2	A	p	130.wav	red.jpg	Sound-Hue	exp2	1	757
Uexp2	A2	A	q	130.wav	blue.jpg	Sound-Hue	exp2	1	735
Uexp2	A2	A	q	130.wav	cyan.jpg	Control	exp2	0	1761
Uexp2	A2	A	p	523.wav	cyan.jpg	Control	exp2	1	2027
Uexp2	A2	A	q	130.wav	red.jpg	Sound-Hue	exp2	0	778
Uexp2	A2	A	q	523.wav	green.jpg	Control	exp2	1	1876
Uexp2	A2	A	p	523.wav	blue.jpg	Sound-Hue	exp2	1	703
Uexp2	A2	A	q	130.wav	black.jpg	Sound-Brightness	exp2	1	784
Uexp2	A2	A	q	130.wav	blue.jpg	Sound-Hue	exp2	1	692
Uexp2	A2	A	p	130.wav	white.jpg	Sound-Brightness	exp2	1	735
Uexp2	A2	A	q	523.wav	green.jpg	Control	exp2	1	1805
Uexp2	A2	A	p	130.wav	green.jpg	Control	exp2	1	1797
Uexp2	A2	A	q	523.wav	green.jpg	Control	exp2	1	1618
Uexp2	A3	A	p	130.wav	white.jpg	Sound-Brightness	exp2	1	1179
Uexp2	A3	A	p	130.wav	red.jpg	Sound-Hue	exp2	1	861
Uexp2	A3	A	p	523.wav	cyan.jpg	Control	exp2	1	3231
Uexp2	A3	A	q	523.wav	green.jpg	Control	exp2	1	1871
Uexp2	A3	A	p	523.wav	cyan.jpg	Control	exp2	1	1876
Uexp2	A3	A	q	130.wav	black.jpg	Sound-Brightness	exp2	1	1211
Uexp2	A3	A	q	130.wav	blue.jpg	Sound-Hue	exp2	1	1410
Uexp2	A3	A	q	130.wav	blue.jpg	Sound-Hue	exp2	1	687
Uexp2	A3	A	p	130.wav	green.jpg	Control	exp2	1	2031
Uexp2	A3	A	q	130.wav	black.jpg	Sound-Brightness	exp2	1	1412
Uexp2	A3	A	p	523.wav	blue.jpg	Sound-Hue	exp2	1	933
Uexp2	A3	A	q	523.wav	green.jpg	Control	exp2	1	2080
Uexp2	A3	A	p	130.wav	red.jpg	Sound-Hue	exp2	1	1601
Uexp2	A3	A	q	130.wav	blue.jpg	Sound-Hue	exp2	1	1101
Uexp2	A3	A	q	523.wav	green.jpg	Control	exp2	1	2078
Uexp2	A3	A	p	130.wav	green.jpg	Control	exp2	1	1891
Uexp2	A3	A	q	523.wav	white.jpg	Sound-Brightness	exp2	1	1050
Uexp2	A3	A	q	130.wav	cyan.jpg	Control	exp2	1	2686
Uexp2	A3	A	p	523.wav	blue.jpg	Sound-Hue	exp2	1	1059
Uexp2	A3	A	q	130.wav	cyan.jpg	Control	exp2	1	3214
Uexp2	A3	A	p	130.wav	green.jpg	Control	exp2	1	1923
Uexp2	A3	A	p	130.wav	red.jpg	Sound-Hue	exp2	1	1231
Uexp2	A3	A	p	130.wav	white.jpg	Sound-Brightness	exp2	1	1093
Uexp2	A3	A	p	523.wav	blue.jpg	Sound-Hue	exp2	1	1059
Uexp2	A3	A	q	130.wav	cyan.jpg	Control	exp2	1	2701
Uexp2	A3	A	q	130.wav	cyan.jpg	Control	exp2	1	1913
Uexp2	A3	A	p	523.wav	cyan.jpg	Control	exp2	1	1792
Uexp2	A3	A	q	130.wav	red.jpg	Sound-Hue	exp2	1	1288
Uexp2	A3	A	q	523.wav	green.jpg	Control	exp2	1	1739
Uexp2	A3	A	q	130.wav	black.jpg	Sound-Brightness	exp2	1	1226
Uexp2	A3	A	q	130.wav	cyan.jpg	Control	exp2	1	2415
Uexp2	A3	A	p	130.wav	red.jpg	Sound-Hue	exp2	1	1388
Uexp2	A3	A	p	523.wav	black.jpg	Sound-Brightness	exp2	1	1234
Uexp2	A3	A	q	130.wav	blue.jpg	Sound-Hue	exp2	1	1154
Uexp2	A3	A	q	523.wav	white.jpg	Sound-Brightness	exp2	1	1701
Uexp2	A3	A	q	523.wav	white.jpg	Sound-Brightness	exp2	1	817
Uexp2	A3	A	q	130.wav	red.jpg	Sound-Hue	exp2	1	901
Uexp2	A3	A	p	523.wav	blue.jpg	Sound-Hue	exp2	1	2904
Uexp2	A3	A	q	130.wav	red.jpg	Sound-Hue	exp2	1	1784
Uexp2	A3	A	q	523.wav	white.jpg	Sound-Brightness	exp2	1	1456
Uexp2	A3	A	p	523.wav	black.jpg	Sound-Brightness	exp2	1	921
Uexp2	A3	A	p	130.wav	white.jpg	Sound-Brightness	exp2	0	1103
Uexp2	A3	A	p	130.wav	red.jpg	Sound-Hue	exp2	1	2354
Uexp2	A3	A	p	130.wav	white.jpg	Sound-Brightness	exp2	1	834
Uexp2	A3	A	p	523.wav	black.jpg	Sound-Brightness	exp2	1	1290
Uexp2	A3	A	p	130.wav	green.jpg	Control	exp2	1	3480
Uexp2	A3	A	p	130.wav	white.jpg	Sound-Brightness	exp2	1	1257
Uexp2	A3	A	p	523.wav	cyan.jpg	Control	exp2	1	1995
Uexp2	A3	A	q	130.wav	black.jpg	Sound-Brightness	exp2	1	1302
Uexp2	A3	A	q	523.wav	white.jpg	Sound-Brightness	exp2	1	2767
Uexp2	A3	A	p	523.wav	black.jpg	Sound-Brightness	exp2	1	1197
Uexp2	A3	A	q	523.wav	green.jpg	Control	exp2	1	2195
Uexp2	A3	A	q	130.wav	red.jpg	Sound-Hue	exp2	0	3748
Uexp2	A3	A	q	130.wav	blue.jpg	Sound-Hue	exp2	1	1067
Uexp2	A3	A	p	523.wav	black.jpg	Sound-Brightness	exp2	1	3805
Uexp2	A3	A	p	130.wav	green.jpg	Control	exp2	1	3600
Uexp2	A3	A	p	523.wav	blue.jpg	Sound-Hue	exp2	1	4162
Uexp2	A3	A	q	130.wav	red.jpg	Sound-Hue	exp2	1	1642
Uexp2	A3	A	q	130.wav	black.jpg	Sound-Brightness	exp2	1	1067
Uexp2	A3	A	p	523.wav	cyan.jpg	Control	exp2	1	2482
Uexp2	A4	A	p	523.wav	blue.jpg	Sound-Hue	exp2	1	860
Uexp2	A4	A	p	130.wav	red.jpg	Sound-Hue	exp2	1	790
Uexp2	A4	A	p	523.wav	blue.jpg	Sound-Hue	exp2	1	883
Uexp2	A4	A	p	130.wav	red.jpg	Sound-Hue	exp2	1	812
Uexp2	A4	A	q	523.wav	white.jpg	Sound-Brightness	exp2	1	729
Uexp2	A4	A	q	130.wav	black.jpg	Sound-Brightness	exp2	0	788
Uexp2	A4	A	p	130.wav	red.jpg	Sound-Hue	exp2	1	747
Uexp2	A4	A	q	130.wav	cyan.jpg	Control	exp2	1	2236
Uexp2	A4	A	p	523.wav	black.jpg	Sound-Brightness	exp2	1	1075
Uexp2	A4	A	p	130.wav	red.jpg	Sound-Hue	exp2	1	825
Uexp2	A4	A	p	130.wav	white.jpg	Sound-Brightness	exp2	1	728
Uexp2	A4	A	q	130.wav	cyan.jpg	Control	exp2	1	1996
Uexp2	A4	A	p	523.wav	blue.jpg	Sound-Hue	exp2	1	676
Uexp2	A4	A	p	523.wav	cyan.jpg	Control	exp2	1	1805
Uexp2	A4	A	p	130.wav	green.jpg	Control	exp2	1	2054
Uexp2	A4	A	p	523.wav	blue.jpg	Sound-Hue	exp2	1	752
Uexp2	A4	A	q	130.wav	blue.jpg	Sound-Hue	exp2	1	686
Uexp2	A4	A	p	130.wav	white.jpg	Sound-Brightness	exp2	1	797
Uexp2	A4	A	p	130.wav	green.jpg	Control	exp2	1	1706
Uexp2	A4	A	q	523.wav	green.jpg	Control	exp2	1	1605
Uexp2	A4	A	p	523.wav	black.jpg	Sound-Brightness	exp2	1	931
Uexp2	A4	A	q	130.wav	blue.jpg	Sound-Hue	exp2	1	1242
Uexp2	A4	A	p	523.wav	cyan.jpg	Control	exp2	1	2653
Uexp2	A4	A	p	523.wav	black.jpg	Sound-Brightness	exp2	1	2030
Uexp2	A4	A	q	130.wav	black.jpg	Sound-Brightness	exp2	1	837
Uexp2	A4	A	p	130.wav	white.jpg	Sound-Brightness	exp2	1	809
Uexp2	A4	A	p	523.wav	cyan.jpg	Control	exp2	1	2513
Uexp2	A4	A	q	130.wav	black.jpg	Sound-Brightness	exp2	1	1190
Uexp2	A4	A	p	523.wav	black.jpg	Sound-Brightness	exp2	1	938
Uexp2	A4	A	p	523.wav	cyan.jpg	Control	exp2	1	1968
Uexp2	A4	A	q	523.wav	white.jpg	Sound-Brightness	exp2	1	967
Uexp2	A4	A	q	130.wav	red.jpg	Sound-Hue	exp2	0	971
Uexp2	A4	A	q	523.wav	white.jpg	Sound-Brightness	exp2	1	912
Uexp2	A4	A	q	523.wav	green.jpg	Control	exp2	1	1945
Uexp2	A4	A	q	130.wav	red.jpg	Sound-Hue	exp2	1	875
Uexp2	A4	A	q	523.wav	white.jpg	Sound-Brightness	exp2	1	793
Uexp2	A4	A	p	523.wav	cyan.jpg	Control	exp2	1	1713
Uexp2	A4	A	p	523.wav	black.jpg	Sound-Brightness	exp2	1	855
Uexp2	A4	A	q	523.wav	green.jpg	Control	exp2	1	1753
Uexp2	A4	A	p	130.wav	green.jpg	Control	exp2	1	2143
Uexp2	A4	A	q	130.wav	blue.jpg	Sound-Hue	exp2	1	1026
Uexp2	A4	A	q	130.wav	cyan.jpg	Control	exp2	1	2105
Uexp2	A4	A	q	130.wav	black.jpg	Sound-Brightness	exp2	1	1376
Uexp2	A4	A	q	130.wav	red.jpg	Sound-Hue	exp2	1	872
Uexp2	A4	A	p	130.wav	green.jpg	Control	exp2	1	2017
Uexp2	A4	A	q	130.wav	red.jpg	Sound-Hue	exp2	1	1017
Uexp2	A4	A	q	130.wav	red.jpg	Sound-Hue	exp2	1	923
Uexp2	A4	A	p	130.wav	red.jpg	Sound-Hue	exp2	1	988
Uexp2	A4	A	q	130.wav	blue.jpg	Sound-Hue	exp2	1	889
Uexp2	A4	A	p	130.wav	white.jpg	Sound-Brightness	exp2	1	986
Uexp2	A4	A	p	130.wav	green.jpg	Control	exp2	1	2715
Uexp2	A4	A	q	523.wav	green.jpg	Control	exp2	1	1903
Uexp2	A4	A	q	523.wav	white.jpg	Sound-Brightness	exp2	1	930
Uexp2	A4	A	q	130.wav	cyan.jpg	Control	exp2	1	2014
Uexp2	A4	A	p	130.wav	white.jpg	Sound-Brightness	exp2	1	936
Uexp2	A4	A	q	130.wav	black.jpg	Sound-Brightness	exp2	1	875
Uexp2	A4	A	q	130.wav	blue.jpg	Sound-Hue	exp2	1	843
Uexp2	A4	A	q	130.wav	cyan.jpg	Control	exp2	1	2964
Uexp2	A4	A	q	523.wav	green.jpg	Control	exp2	1	2560
Uexp2	A4	A	p	523.wav	blue.jpg	Sound-Hue	exp2	1	1098
Uexp2	A5	A	p	130.wav	white.jpg	Sound-Brightness	exp2	1	1443
Uexp2	A5	A	q	130.wav	red.jpg	Sound-Hue	exp2	1	1125
Uexp2	A5	A	p	130.wav	green.jpg	Control	exp2	1	2113
Uexp2	A5	A	p	130.wav	red.jpg	Sound-Hue	exp2	1	908
Uexp2	A5	A	q	130.wav	red.jpg	Sound-Hue	exp2	0	685
Uexp2	A5	A	p	523.wav	cyan.jpg	Control	exp2	0	1723
Uexp2	A5	A	p	523.wav	cyan.jpg	Control	exp2	1	1679
Uexp2	A5	A	q	523.wav	green.jpg	Control	exp2	1	1633
Uexp2	A5	A	p	130.wav	red.jpg	Sound-Hue	exp2	1	952
Uexp2	A5	A	q	130.wav	blue.jpg	Sound-Hue	exp2	1	950
Uexp2	A5	A	p	130.wav	white.jpg	Sound-Brightness	exp2	1	1422
Uexp2	A5	A	p	523.wav	blue.jpg	Sound-Hue	exp2	1	1248
Uexp2	A5	A	q	523.wav	green.jpg	Control	exp2	1	1761
Uexp2	A5	A	q	523.wav	white.jpg	Sound-Brightness	exp2	1	648
Uexp2	A5	A	q	130.wav	blue.jpg	Sound-Hue	exp2	1	1602
Uexp2	A5	A	p	523.wav	blue.jpg	Sound-Hue	exp2	1	1206
Uexp2	A5	A	p	130.wav	green.jpg	Control	exp2	1	2745
Uexp2	A5	A	p	523.wav	blue.jpg	Sound-Hue	exp2	1	1154
Uexp2	A5	A	p	130.wav	green.jpg	Control	exp2	1	1947
Uexp2	A5	A	p	523.wav	cyan.jpg	Control	exp2	0	1809
Uexp2	A5	A	p	130.wav	red.jpg	Sound-Hue	exp2	1	1012
Uexp2	A5	A	p	523.wav	blue.jpg	Sound-Hue	exp2	1	1285
Uexp2	A5	A	q	523.wav	white.jpg	Sound-Brightness	exp2	1	1417
Uexp2	A5	A	p	523.wav	cyan.jpg	Control	exp2	1	2224
Uexp2	A5	A	q	130.wav	black.jpg	Sound-Brightness	exp2	1	1386
Uexp2	A5	A	q	130.wav	cyan.jpg	Control	exp2	1	3009
Uexp2	A5	A	p	523.wav	black.jpg	Sound-Brightness	exp2	1	1227
Uexp2	A5	A	q	130.wav	cyan.jpg	Control	exp2	0	2016
Uexp2	A5	A	q	130.wav	black.jpg	Sound-Brightness	exp2	1	891
Uexp2	A5	A	q	130.wav	blue.jpg	Sound-Hue	exp2	1	1487
Uexp2	A5	A	q	130.wav	red.jpg	Sound-Hue	exp2	1	975
Uexp2	A5	A	q	130.wav	cyan.jpg	Control	exp2	0	2285
Uexp2	A5	A	p	523.wav	black.jpg	Sound-Brightness	exp2	1	978
Uexp2	A5	A	q	523.wav	white.jpg	Sound-Brightness	exp2	1	730
Uexp2	A5	A	p	523.wav	black.jpg	Sound-Brightness	exp2	1	1262
Uexp2	A5	A	q	130.wav	blue.jpg	Sound-Hue	exp2	1	1458
Uexp2	A5	A	q	130.wav	cyan.jpg	Control	exp2	0	1892
Uexp2	A5	A	p	130.wav	red.jpg	Sound-Hue	exp2	1	1607
Uexp2	A5	A	q	130.wav	black.jpg	Sound-Brightness	exp2	1	801
Uexp2	A5	A	q	130.wav	blue.jpg	Sound-Hue	exp2	1	1582
Uexp2	A5	A	q	523.wav	green.jpg	Control	exp2	0	2107
Uexp2	A5	A	p	130.wav	white.jpg	Sound-Brightness	exp2	1	1899
Uexp2	A5	A	p	130.wav	red.jpg	Sound-Hue	exp2	1	1503
Uexp2	A5	A	p	523.wav	blue.jpg	Sound-Hue	exp2	1	1480
Uexp2	A5	A	p	523.wav	black.jpg	Sound-Brightness	exp2	1	1155
Uexp2	A5	A	q	523.wav	green.jpg	Control	exp2	1	2810
Uexp2	A5	A	p	130.wav	white.jpg	Sound-Brightness	exp2	1	799
Uexp2	A5	A	q	523.wav	green.jpg	Control	exp2	1	1682
Uexp2	A5	A	q	130.wav	red.jpg	Sound-Hue	exp2	1	1345
Uexp2	A5	A	q	130.wav	black.jpg	Sound-Brightness	exp2	1	1067
Uexp2	A5	A	q	523.wav	white.jpg	Sound-Brightness	exp2	1	1259
Uexp2	A5	A	q	130.wav	red.jpg	Sound-Hue	exp2	0	1419
Uexp2	A5	A	p	130.wav	green.jpg	Control	exp2	1	2245
Uexp2	A5	A	q	130.wav	cyan.jpg	Control	exp2	1	2468
Uexp2	A5	A	p	130.wav	green.jpg	Control	exp2	1	2851
Uexp2	A5	A	q	523.wav	white.jpg	Sound-Brightness	exp2	1	785
Uexp2	A5	A	q	130.wav	black.jpg	Sound-Brightness	exp2	1	802
Uexp2	A5	A	p	523.wav	cyan.jpg	Control	exp2	1	2906
Uexp2	A5	A	p	130.wav	white.jpg	Sound-Brightness	exp2	1	2074
Uexp2	A5	A	p	523.wav	black.jpg	Sound-Brightness	exp2	1	1303
Uexp2	A6	A	p	523.wav	blue.jpg	Sound-Hue	exp2	1	1435
Uexp2	A6	A	q	523.wav	red.jpg	Sound-Hue	exp2	1	671
Uexp2	A6	A	p	523.wav	black.jpg	Sound-Brightness	exp2	1	1336
Uexp2	A6	A	q	130.wav	blue.jpg	Sound-Hue	exp2	1	992
Uexp2	A6	A	p	523.wav	cyan.jpg	Control	exp2	0	1648
Uexp2	A6	A	q	523.wav	green.jpg	Control	exp2	1	1811
Uexp2	A6	A	p	523.wav	black.jpg	Sound-Brightness	exp2	1	937
Uexp2	A6	A	q	523.wav	white.jpg	Sound-Brightness	exp2	1	728
Uexp2	A6	A	p	130.wav	red.jpg	Sound-Hue	exp2	1	1181
Uexp2	A6	A	p	130.wav	red.jpg	Sound-Hue	exp2	1	745
Uexp2	A6	A	p	523.wav	blue.jpg	Sound-Hue	exp2	0	977
Uexp2	A6	A	p	523.wav	cyan.jpg	Control	exp2	0	1745
Uexp2	A6	A	p	130.wav	green.jpg	Control	exp2	0	2540
Uexp2	A6	A	p	130.wav	white.jpg	Sound-Brightness	exp2	1	1479
Uexp2	A6	A	q	130.wav	black.jpg	Sound-Brightness	exp2	1	894
Uexp2	A6	A	p	130.wav	white.jpg	Sound-Brightness	exp2	1	1565
Uexp2	A6	A	q	130.wav	black.jpg	Sound-Brightness	exp2	1	1349
Uexp2	A6	A	q	523.wav	green.jpg	Control	exp2	1	1848
Uexp2	A6	A	p	130.wav	white.jpg	Sound-Brightness	exp2	1	924
Uexp2	A6	A	q	523.wav	red.jpg	Sound-Hue	exp2	1	848
Uexp2	A6	A	p	523.wav	blue.jpg	Sound-Hue	exp2	1	1571
Uexp2	A6	A	p	130.wav	white.jpg	Sound-Brightness	exp2	1	1683
Uexp2	A6	A	p	523.wav	blue.jpg	Sound-Hue	exp2	1	1544
Uexp2	A6	A	p	130.wav	red.jpg	Sound-Hue	exp2	1	991
Uexp2	A6	A	p	130.wav	green.jpg	Control	exp2	0	1990
Uexp2	A6	A	q	130.wav	black.jpg	Sound-Brightness	exp2	1	1314
Uexp2	A6	A	q	523.wav	red.jpg	Sound-Hue	exp2	1	1567
Uexp2	A6	A	q	523.wav	green.jpg	Control	exp2	1	2506
Uexp2	A6	A	p	523.wav	cyan.jpg	Control	exp2	1	2410
Uexp2	A6	A	q	130.wav	blue.jpg	Sound-Hue	exp2	1	1580
Uexp2	A6	A	q	130.wav	cyan.jpg	Control	exp2	1	2397
Uexp2	A6	A	q	523.wav	green.jpg	Control	exp2	1	1988
Uexp2	A6	A	q	130.wav	cyan.jpg	Control	exp2	1	2426
Uexp2	A6	A	q	130.wav	cyan.jpg	Control	exp2	1	2521
Uexp2	A6	A	p	523.wav	cyan.jpg	Control	exp2	1	2655
Uexp2	A6	A	p	130.wav	red.jpg	Sound-Hue	exp2	1	1733
Uexp2	A6	A	p	523.wav	cyan.jpg	Control	exp2	1	2824
Uexp2	A6	A	q	130.wav	blue.jpg	Sound-Hue	exp2	1	968
Uexp2	A6	A	p	130.wav	green.jpg	Control	exp2	1	2745
Uexp2	A6	A	p	523.wav	black.jpg	Sound-Brightness	exp2	1	1082
Uexp2	A6	A	q	523.wav	white.jpg	Sound-Brightness	exp2	1	1409
Uexp2	A6	A	p	130.wav	green.jpg	Control	exp2	1	2989
Uexp2	A6	A	p	130.wav	red.jpg	Sound-Hue	exp2	1	1134
Uexp2	A6	A	q	523.wav	white.jpg	Sound-Brightness	exp2	1	905
Uexp2	A6	A	p	130.wav	green.jpg	Control	exp2	1	2199
Uexp2	A6	A	q	130.wav	blue.jpg	Sound-Hue	exp2	1	950
Uexp2	A6	A	p	130.wav	white.jpg	Sound-Brightness	exp2	1	1003
Uexp2	A6	A	q	130.wav	black.jpg	Sound-Brightness	exp2	0	1803
Uexp2	A6	A	q	130.wav	cyan.jpg	Control	exp2	1	2500
Uexp2	A6	A	q	130.wav	cyan.jpg	Control	exp2	1	1803
Uexp2	A6	A	q	523.wav	white.jpg	Sound-Brightness	exp2	1	932
Uexp2	A6	A	p	523.wav	black.jpg	Sound-Brightness	exp2	1	867
Uexp2	A6	A	q	523.wav	green.jpg	Control	exp2	1	2308
Uexp2	A6	A	q	523.wav	red.jpg	Sound-Hue	exp2	1	1020
Uexp2	A6	A	p	523.wav	blue.jpg	Sound-Hue	exp2	1	2288
Uexp2	A6	A	q	523.wav	white.jpg	Sound-Brightness	exp2	1	947
Uexp2	A6	A	p	523.wav	black.jpg	Sound-Brightness	exp2	1	1091
Uexp2	A6	A	q	523.wav	red.jpg	Sound-Hue	exp2	1	1213
Uexp2	A6	A	q	130.wav	blue.jpg	Sound-Hue	exp2	1	1538
Uexp2	A6	A	q	130.wav	black.jpg	Sound-Brightness	exp2	1	625
Uexp2	A7	A	q	523.wav	white.jpg	Sound-Brightness	exp2	1	1366
Uexp2	A7	A	p	523.wav	blue.jpg	Sound-Hue	exp2	1	830
Uexp2	A7	A	p	130.wav	red.jpg	Sound-Hue	exp2	1	851
Uexp2	A7	A	q	130.wav	cyan.jpg	Control	exp2	0	1885
Uexp2	A7	A	q	130.wav	cyan.jpg	Control	exp2	1	1715
Uexp2	A7	A	p	523.wav	black.jpg	Sound-Brightness	exp2	1	826
Uexp2	A7	A	q	523.wav	white.jpg	Sound-Brightness	exp2	1	710
Uexp2	A7	A	p	523.wav	blue.jpg	Sound-Hue	exp2	1	654
Uexp2	A7	A	p	130.wav	red.jpg	Sound-Hue	exp2	1	744
Uexp2	A7	A	q	130.wav	black.jpg	Sound-Brightness	exp2	1	686
Uexp2	A7	A	q	523.wav	green.jpg	Control	exp2	1	1807
Uexp2	A7	A	p	130.wav	red.jpg	Sound-Hue	exp2	1	767
Uexp2	A7	A	q	523.wav	white.jpg	Sound-Brightness	exp2	1	624
Uexp2	A7	A	q	523.wav	green.jpg	Control	exp2	1	1703
Uexp2	A7	A	q	130.wav	black.jpg	Sound-Brightness	exp2	1	954
Uexp2	A7	A	q	523.wav	red.jpg	Sound-Hue	exp2	1	984
Uexp2	A7	A	q	130.wav	black.jpg	Sound-Brightness	exp2	1	815
Uexp2	A7	A	q	523.wav	red.jpg	Sound-Hue	exp2	1	618
Uexp2	A7	A	p	130.wav	white.jpg	Sound-Brightness	exp2	1	841
Uexp2	A7	A	q	130.wav	cyan.jpg	Control	exp2	0	2754
Uexp2	A7	A	p	523.wav	black.jpg	Sound-Brightness	exp2	1	1411
Uexp2	A7	A	p	523.wav	black.jpg	Sound-Brightness	exp2	1	899
Uexp2	A7	A	q	523.wav	green.jpg	Control	exp2	1	2027
Uexp2	A7	A	q	130.wav	black.jpg	Sound-Brightness	exp2	1	1094
Uexp2	A7	A	q	523.wav	green.jpg	Control	exp2	1	1889
Uexp2	A7	A	q	130.wav	blue.jpg	Sound-Hue	exp2	1	1079
Uexp2	A7	A	q	130.wav	blue.jpg	Sound-Hue	exp2	1	983
Uexp2	A7	A	p	130.wav	green.jpg	Control	exp2	1	2043
Uexp2	A7	A	q	130.wav	black.jpg	Sound-Brightness	exp2	1	938
Uexp2	A7	A	p	523.wav	black.jpg	Sound-Brightness	exp2	1	1497
Uexp2	A7	A	q	130.wav	blue.jpg	Sound-Hue	exp2	1	941
Uexp2	A7	A	p	523.wav	blue.jpg	Sound-Hue	exp2	1	964
Uexp2	A7	A	q	523.wav	white.jpg	Sound-Brightness	exp2	1	719
Uexp2	A7	A	p	523.wav	cyan.jpg	Control	exp2	0	2996
Uexp2	A7	A	p	130.wav	red.jpg	Sound-Hue	exp2	1	822
Uexp2	A7	A	q	130.wav	cyan.jpg	Control	exp2	0	2200
Uexp2	A7	A	q	523.wav	red.jpg	Sound-Hue	exp2	1	1263
Uexp2	A7	A	p	130.wav	white.jpg	Sound-Brightness	exp2	1	907
Uexp2	A7	A	q	130.wav	blue.jpg	Sound-Hue	exp2	1	901
Uexp2	A7	A	q	523.wav	green.jpg	Control	exp2	1	1825
Uexp2	A7	A	q	523.wav	white.jpg	Sound-Brightness	exp2	0	1145
Uexp2	A7	A	p	130.wav	green.jpg	Control	exp2	1	3172
Uexp2	A7	A	p	523.wav	cyan.jpg	Control	exp2	0	2566
Uexp2	A7	A	p	523.wav	cyan.jpg	Control	exp2	1	2087
Uexp2	A7	A	p	130.wav	white.jpg	Sound-Brightness	exp2	1	969
Uexp2	A7	A	p	523.wav	blue.jpg	Sound-Hue	exp2	1	852
Uexp2	A7	A	p	130.wav	white.jpg	Sound-Brightness	exp2	1	837
Uexp2	A7	A	p	130.wav	green.jpg	Control	exp2	1	2123
Uexp2	A7	A	p	523.wav	black.jpg	Sound-Brightness	exp2	1	950
Uexp2	A7	A	p	130.wav	green.jpg	Control	exp2	0	2307
Uexp2	A7	A	q	130.wav	blue.jpg	Sound-Hue	exp2	1	1099
Uexp2	A7	A	q	130.wav	cyan.jpg	Control	exp2	0	1853
Uexp2	A7	A	p	523.wav	blue.jpg	Sound-Hue	exp2	1	1364
Uexp2	A7	A	p	130.wav	green.jpg	Control	exp2	1	2031
Uexp2	A7	A	q	523.wav	red.jpg	Sound-Hue	exp2	1	739
Uexp2	A7	A	p	130.wav	red.jpg	Sound-Hue	exp2	1	657
Uexp2	A7	A	q	523.wav	red.jpg	Sound-Hue	exp2	1	680
Uexp2	A7	A	p	130.wav	white.jpg	Sound-Brightness	exp2	0	1040
Uexp2	A7	A	p	523.wav	cyan.jpg	Control	exp2	1	2207
Uexp2	A7	A	p	523.wav	cyan.jpg	Control	exp2	1	1906
Uexp2	A8	A	p	130.wav	green.jpg	Control	exp2	1	2199
Uexp2	A8	A	q	523.wav	green.jpg	Control	exp2	1	1893
Uexp2	A8	A	q	130.wav	black.jpg	Sound-Brightness	exp2	1	977
Uexp2	A8	A	p	130.wav	green.jpg	Control	exp2	1	1884
Uexp2	A8	A	p	523.wav	black.jpg	Sound-Brightness	exp2	1	892
Uexp2	A8	A	p	130.wav	green.jpg	Control	exp2	1	1978
Uexp2	A8	A	p	130.wav	red.jpg	Sound-Hue	exp2	1	813
Uexp2	A8	A	q	130.wav	cyan.jpg	Control	exp2	0	1908
Uexp2	A8	A	q	523.wav	red.jpg	Sound-Hue	exp2	1	685
Uexp2	A8	A	q	523.wav	green.jpg	Control	exp2	1	1818
Uexp2	A8	A	p	523.wav	cyan.jpg	Control	exp2	1	1835
Uexp2	A8	A	q	130.wav	black.jpg	Sound-Brightness	exp2	1	947
Uexp2	A8	A	q	130.wav	cyan.jpg	Control	exp2	1	2048
Uexp2	A8	A	q	523.wav	white.jpg	Sound-Brightness	exp2	1	751
Uexp2	A8	A	p	130.wav	white.jpg	Sound-Brightness	exp2	1	826
Uexp2	A8	A	q	130.wav	cyan.jpg	Control	exp2	0	1942
Uexp2	A8	A	q	130.wav	cyan.jpg	Control	exp2	1	2937
Uexp2	A8	A	p	523.wav	blue.jpg	Sound-Hue	exp2	1	790
Uexp2	A8	A	p	130.wav	red.jpg	Sound-Hue	exp2	1	850
Uexp2	A8	A	p	130.wav	red.jpg	Sound-Hue	exp2	1	763
Uexp2	A8	A	q	130.wav	blue.jpg	Sound-Hue	exp2	1	904
Uexp2	A8	A	q	523.wav	white.jpg	Sound-Brightness	exp2	1	733
Uexp2	A8	A	q	130.wav	black.jpg	Sound-Brightness	exp2	1	933
Uexp2	A8	A	p	523.wav	black.jpg	Sound-Brightness	exp2	1	871
Uexp2	A8	A	p	523.wav	black.jpg	Sound-Brightness	exp2	1	1116
Uexp2	A8	A	q	523.wav	red.jpg	Sound-Hue	exp2	1	999
Uexp2	A8	A	q	523.wav	white.jpg	Sound-Brightness	exp2	1	710
Uexp2	A8	A	p	523.wav	blue.jpg	Sound-Hue	exp2	1	1045
Uexp2	A8	A	q	130.wav	blue.jpg	Sound-Hue	exp2	1	1014
Uexp2	A8	A	p	523.wav	cyan.jpg	Control	exp2	0	2532
Uexp2	A8	A	q	130.wav	blue.jpg	Sound-Hue	exp2	0	1030
Uexp2	A8	A	q	523.wav	green.jpg	Control	exp2	1	1992
Uexp2	A8	A	p	523.wav	blue.jpg	Sound-Hue	exp2	1	885
Uexp2	A8	A	p	523.wav	cyan.jpg	Control	exp2	1	2952
Uexp2	A8	A	p	130.wav	red.jpg	Sound-Hue	exp2	1	2409
Uexp2	A8	A	q	130.wav	blue.jpg	Sound-Hue	exp2	1	769
Uexp2	A8	A	p	523.wav	blue.jpg	Sound-Hue	exp2	1	953
Uexp2	A8	A	p	130.wav	green.jpg	Control	exp2	1	2126
Uexp2	A8	A	p	130.wav	green.jpg	Control	exp2	1	2048
Uexp2	A8	A	q	130.wav	blue.jpg	Sound-Hue	exp2	1	862
Uexp2	A8	A	p	130.wav	red.jpg	Sound-Hue	exp2	1	728
Uexp2	A8	A	q	130.wav	black.jpg	Sound-Brightness	exp2	1	793
Uexp2	A8	A	q	523.wav	red.jpg	Sound-Hue	exp2	1	723
Uexp2	A8	A	p	523.wav	blue.jpg	Sound-Hue	exp2	1	789
Uexp2	A8	A	p	130.wav	white.jpg	Sound-Brightness	exp2	1	868
Uexp2	A8	A	q	523.wav	white.jpg	Sound-Brightness	exp2	1	637
Uexp2	A8	A	p	523.wav	black.jpg	Sound-Brightness	exp2	1	1078
Uexp2	A8	A	p	523.wav	cyan.jpg	Control	exp2	1	2290
Uexp2	A8	A	p	130.wav	white.jpg	Sound-Brightness	exp2	1	883
Uexp2	A8	A	q	523.wav	red.jpg	Sound-Hue	exp2	1	761
Uexp2	A8	A	q	523.wav	green.jpg	Control	exp2	1	2551
Uexp2	A8	A	q	523.wav	red.jpg	Sound-Hue	exp2	1	791
Uexp2	A8	A	p	130.wav	white.jpg	Sound-Brightness	exp2	1	751
Uexp2	A8	A	q	130.wav	black.jpg	Sound-Brightness	exp2	1	715
Uexp2	A8	A	q	523.wav	white.jpg	Sound-Brightness	exp2	1	797
Uexp2	A8	A	q	523.wav	green.jpg	Control	exp2	1	1757
Uexp2	A8	A	p	523.wav	cyan.jpg	Control	exp2	1	1854
Uexp2	A8	A	p	523.wav	black.jpg	Sound-Brightness	exp2	1	945
Uexp2	A8	A	p	130.wav	white.jpg	Sound-Brightness	exp2	1	988
Uexp2	A8	A	q	130.wav	cyan.jpg	Control	exp2	1	2025
Uexp2	A9	A	q	130.wav	cyan.jpg	Control	exp2	0	2436
Uexp2	A9	A	p	130.wav	white.jpg	Sound-Brightness	exp2	1	1049
Uexp2	A9	A	p	130.wav	green.jpg	Control	exp2	1	2410
Uexp2	A9	A	p	523.wav	cyan.jpg	Control	exp2	1	2100
Uexp2	A9	A	p	523.wav	black.jpg	Sound-Brightness	exp2	1	993
Uexp2	A9	A	p	130.wav	white.jpg	Sound-Brightness	exp2	1	962
Uexp2	A9	A	q	130.wav	black.jpg	Sound-Brightness	exp2	1	884
Uexp2	A9	A	p	130.wav	red.jpg	Sound-Hue	exp2	1	906
Uexp2	A9	A	q	130.wav	blue.jpg	Sound-Hue	exp2	0	2351
Uexp2	A9	A	q	130.wav	blue.jpg	Sound-Hue	exp2	1	1211
Uexp2	A9	A	q	130.wav	black.jpg	Sound-Brightness	exp2	1	1540
Uexp2	A9	A	p	523.wav	blue.jpg	Sound-Hue	exp2	1	912
Uexp2	A9	A	q	523.wav	white.jpg	Sound-Brightness	exp2	1	729
Uexp2	A9	A	p	130.wav	white.jpg	Sound-Brightness	exp2	1	820
Uexp2	A9	A	q	130.wav	cyan.jpg	Control	exp2	1	2281
Uexp2	A9	A	p	523.wav	cyan.jpg	Control	exp2	1	1995
Uexp2	A9	A	q	130.wav	black.jpg	Sound-Brightness	exp2	1	904
Uexp2	A9	A	p	130.wav	red.jpg	Sound-Hue	exp2	1	1310
Uexp2	A9	A	q	523.wav	white.jpg	Sound-Brightness	exp2	1	889
Uexp2	A9	A	q	523.wav	white.jpg	Sound-Brightness	exp2	1	823
Uexp2	A9	A	q	523.wav	green.jpg	Control	exp2	1	1853
Uexp2	A9	A	p	523.wav	cyan.jpg	Control	exp2	1	1860
Uexp2	A9	A	q	523.wav	white.jpg	Sound-Brightness	exp2	1	1204
Uexp2	A9	A	p	130.wav	green.jpg	Control	exp2	1	2560
Uexp2	A9	A	q	523.wav	green.jpg	Control	exp2	1	2009
Uexp2	A9	A	q	130.wav	cyan.jpg	Control	exp2	1	2225
Uexp2	A9	A	q	130.wav	blue.jpg	Sound-Hue	exp2	1	1033
Uexp2	A9	A	p	130.wav	white.jpg	Sound-Brightness	exp2	1	906
Uexp2	A9	A	q	523.wav	green.jpg	Control	exp2	1	2032
Uexp2	A9	A	q	523.wav	green.jpg	Control	exp2	1	2056
Uexp2	A9	A	q	130.wav	black.jpg	Sound-Brightness	exp2	1	1271
Uexp2	A9	A	p	130.wav	red.jpg	Sound-Hue	exp2	1	2018
Uexp2	A9	A	p	523.wav	blue.jpg	Sound-Hue	exp2	1	1117
Uexp2	A9	A	p	523.wav	cyan.jpg	Control	exp2	1	2824
Uexp2	A9	A	p	523.wav	blue.jpg	Sound-Hue	exp2	1	1446
Uexp2	A9	A	q	523.wav	white.jpg	Sound-Brightness	exp2	1	916
Uexp2	A9	A	q	130.wav	cyan.jpg	Control	exp2	1	2772
Uexp2	A9	A	p	130.wav	red.jpg	Sound-Hue	exp2	1	990
Uexp2	A9	A	p	130.wav	green.jpg	Control	exp2	1	2390
Uexp2	A9	A	p	523.wav	black.jpg	Sound-Brightness	exp2	1	1279
Uexp2	A9	A	q	130.wav	cyan.jpg	Control	exp2	1	2907
Uexp2	A9	A	p	523.wav	black.jpg	Sound-Brightness	exp2	1	1005
Uexp2	A9	A	q	130.wav	black.jpg	Sound-Brightness	exp2	1	1205
Uexp2	A9	A	q	523.wav	green.jpg	Control	exp2	1	2431
Uexp2	A9	A	p	523.wav	blue.jpg	Sound-Hue	exp2	1	860
Uexp2	A9	A	q	130.wav	blue.jpg	Sound-Hue	exp2	1	994
Uexp2	A9	A	p	130.wav	green.jpg	Control	exp2	1	1999
Uexp2	A9	A	p	523.wav	black.jpg	Sound-Brightness	exp2	1	998
Uexp2	A9	A	p	523.wav	blue.jpg	Sound-Hue	exp2	1	1367
Uexp2	A9	A	q	523.wav	red.jpg	Sound-Hue	exp2	1	1039
Uexp2	A9	A	q	523.wav	red.jpg	Sound-Hue	exp2	1	924
Uexp2	A9	A	q	523.wav	red.jpg	Sound-Hue	exp2	1	819
Uexp2	A9	A	p	130.wav	green.jpg	Control	exp2	1	2048
Uexp2	A9	A	p	130.wav	white.jpg	Sound-Brightness	exp2	1	2094
Uexp2	A9	A	q	130.wav	blue.jpg	Sound-Hue	exp2	1	1312
Uexp2	A9	A	p	523.wav	cyan.jpg	Control	exp2	1	1935
Uexp2	A9	A	p	523.wav	black.jpg	Sound-Brightness	exp2	1	1235
Uexp2	A9	A	q	523.wav	red.jpg	Sound-Hue	exp2	1	1118
Uexp2	A9	A	q	523.wav	red.jpg	Sound-Hue	exp2	1	1255
Uexp2	A9	A	p	130.wav	red.jpg	Sound-Hue	exp2	1	1761
Uexp2	A10	A	q	523.wav	red.jpg	Sound-Hue	exp2	1	821
Uexp2	A10	A	q	130.wav	cyan.jpg	Control	exp2	1	2241
Uexp2	A10	A	q	130.wav	black.jpg	Sound-Brightness	exp2	1	876
Uexp2	A10	A	p	523.wav	cyan.jpg	Control	exp2	1	2027
Uexp2	A10	A	q	523.wav	white.jpg	Sound-Brightness	exp2	1	855
Uexp2	A10	A	q	523.wav	white.jpg	Sound-Brightness	exp2	1	723
Uexp2	A10	A	p	130.wav	red.jpg	Sound-Hue	exp2	1	1049
Uexp2	A10	A	q	523.wav	green.jpg	Control	exp2	1	1880
Uexp2	A10	A	p	130.wav	white.jpg	Sound-Brightness	exp2	1	1005
Uexp2	A10	A	p	130.wav	green.jpg	Control	exp2	1	2268
Uexp2	A10	A	p	130.wav	white.jpg	Sound-Brightness	exp2	1	938
Uexp2	A10	A	p	130.wav	white.jpg	Sound-Brightness	exp2	1	559
Uexp2	A10	A	p	130.wav	green.jpg	Control	exp2	1	2185
Uexp2	A10	A	q	523.wav	white.jpg	Sound-Brightness	exp2	1	694
Uexp2	A10	A	q	523.wav	red.jpg	Sound-Hue	exp2	1	595
Uexp2	A10	A	p	130.wav	green.jpg	Control	exp2	1	2068
Uexp2	A10	A	q	130.wav	blue.jpg	Sound-Hue	exp2	1	1170
Uexp2	A10	A	q	523.wav	green.jpg	Control	exp2	1	2118
Uexp2	A10	A	q	523.wav	green.jpg	Control	exp2	1	2045
Uexp2	A10	A	p	523.wav	black.jpg	Sound-Brightness	exp2	1	829
Uexp2	A10	A	q	130.wav	cyan.jpg	Control	exp2	1	2510
Uexp2	A10	A	p	130.wav	green.jpg	Control	exp2	1	2223
Uexp2	A10	A	p	130.wav	red.jpg	Sound-Hue	exp2	1	761
Uexp2	A10	A	p	130.wav	red.jpg	Sound-Hue	exp2	1	622
Uexp2	A10	A	p	523.wav	blue.jpg	Sound-Hue	exp2	1	972
Uexp2	A10	A	q	130.wav	black.jpg	Sound-Brightness	exp2	1	1094
Uexp2	A10	A	p	523.wav	cyan.jpg	Control	exp2	1	1887
Uexp2	A10	A	p	523.wav	blue.jpg	Sound-Hue	exp2	1	797
Uexp2	A10	A	p	130.wav	red.jpg	Sound-Hue	exp2	1	776
Uexp2	A10	A	q	130.wav	blue.jpg	Sound-Hue	exp2	1	913
Uexp2	A10	A	q	130.wav	cyan.jpg	Control	exp2	1	2325
Uexp2	A10	A	q	130.wav	black.jpg	Sound-Brightness	exp2	1	691
Uexp2	A10	A	p	523.wav	blue.jpg	Sound-Hue	exp2	1	833
Uexp2	A10	A	q	523.wav	white.jpg	Sound-Brightness	exp2	1	676
Uexp2	A10	A	p	523.wav	cyan.jpg	Control	exp2	1	2578
Uexp2	A10	A	q	523.wav	red.jpg	Sound-Hue	exp2	1	589
Uexp2	A10	A	p	523.wav	cyan.jpg	Control	exp2	1	1989
Uexp2	A10	A	q	130.wav	blue.jpg	Sound-Hue	exp2	1	888
Uexp2	A10	A	q	523.wav	red.jpg	Sound-Hue	exp2	1	607
Uexp2	A10	A	q	523.wav	green.jpg	Control	exp2	1	2154
Uexp2	A10	A	q	130.wav	black.jpg	Sound-Brightness	exp2	1	828
Uexp2	A10	A	p	130.wav	red.jpg	Sound-Hue	exp2	1	760
Uexp2	A10	A	p	523.wav	black.jpg	Sound-Brightness	exp2	1	1075
Uexp2	A10	A	p	523.wav	black.jpg	Sound-Brightness	exp2	1	831
Uexp2	A10	A	q	523.wav	white.jpg	Sound-Brightness	exp2	1	652
Uexp2	A10	A	p	130.wav	green.jpg	Control	exp2	1	2895
Uexp2	A10	A	p	523.wav	black.jpg	Sound-Brightness	exp2	0	720
Uexp2	A10	A	q	130.wav	blue.jpg	Sound-Hue	exp2	0	1104
Uexp2	A10	A	p	523.wav	blue.jpg	Sound-Hue	exp2	1	1331
Uexp2	A10	A	q	523.wav	red.jpg	Sound-Hue	exp2	1	996
Uexp2	A10	A	q	130.wav	blue.jpg	Sound-Hue	exp2	1	802
Uexp2	A10	A	p	130.wav	white.jpg	Sound-Brightness	exp2	1	768
Uexp2	A10	A	q	130.wav	cyan.jpg	Control	exp2	1	2944
Uexp2	A10	A	p	523.wav	blue.jpg	Sound-Hue	exp2	1	1058
Uexp2	A10	A	p	130.wav	white.jpg	Sound-Brightness	exp2	1	855
Uexp2	A10	A	p	523.wav	cyan.jpg	Control	exp2	0	2783
Uexp2	A10	A	q	130.wav	black.jpg	Sound-Brightness	exp2	1	910
Uexp2	A10	A	q	523.wav	green.jpg	Control	exp2	1	1810
Uexp2	A10	A	q	130.wav	cyan.jpg	Control	exp2	1	2642
Uexp2	A10	A	p	523.wav	black.jpg	Sound-Brightness	exp2	1	665
Uexp2	B1	B	q	130.wav	red.jpg	Sound-Hue	exp2	1	1577
Uexp2	B1	B	p	523.wav	white.jpg	Sound-Brightness	exp2	1	1424
Uexp2	B1	B	q	523.wav	blue.jpg	Sound-Hue	exp2	1	2131
Uexp2	B1	B	p	523.wav	white.jpg	Sound-Brightness	exp2	1	1317
Uexp2	B1	B	p	523.wav	green.jpg	Control	exp2	1	1611
Uexp2	B1	B	p	523.wav	white.jpg	Sound-Brightness	exp2	1	1225
Uexp2	B1	B	p	130.wav	cyan.jpg	Control	exp2	0	2185
Uexp2	B1	B	p	130.wav	blue.jpg	Sound-Hue	exp2	1	1513
Uexp2	B1	B	p	130.wav	black.jpg	Sound-Brightness	exp2	1	2040
Uexp2	B1	B	q	523.wav	black.jpg	Sound-Brightness	exp2	1	1700
Uexp2	B1	B	q	130.wav	white.jpg	Sound-Brightness	exp2	1	1893
Uexp2	B1	B	q	523.wav	blue.jpg	Sound-Hue	exp2	0	1518
Uexp2	B1	B	q	130.wav	red.jpg	Sound-Hue	exp2	1	2987
Uexp2	B1	B	q	523.wav	cyan.jpg	Control	exp2	1	2754
Uexp2	B1	B	p	130.wav	black.jpg	Sound-Brightness	exp2	1	1366
Uexp2	B1	B	p	130.wav	cyan.jpg	Control	exp2	1	3076
Uexp2	B1	B	q	130.wav	green.jpg	Control	exp2	1	2491
Uexp2	B1	B	q	523.wav	black.jpg	Sound-Brightness	exp2	1	2439
Uexp2	B1	B	q	130.wav	green.jpg	Control	exp2	1	2337
Uexp2	B1	B	p	130.wav	black.jpg	Sound-Brightness	exp2	0	1593
Uexp2	B1	B	q	523.wav	blue.jpg	Sound-Hue	exp2	1	1417
Uexp2	B1	B	p	130.wav	black.jpg	Sound-Brightness	exp2	1	1308
Uexp2	B1	B	q	130.wav	green.jpg	Control	exp2	1	3339
Uexp2	B1	B	q	523.wav	black.jpg	Sound-Brightness	exp2	1	1949
Uexp2	B1	B	p	523.wav	red.jpg	Sound-Hue	exp2	1	1657
Uexp2	B1	B	q	130.wav	green.jpg	Control	exp2	0	1684
Uexp2	B1	B	p	523.wav	green.jpg	Control	exp2	0	1313
Uexp2	B1	B	p	130.wav	cyan.jpg	Control	exp2	1	2637
Uexp2	B1	B	p	523.wav	white.jpg	Sound-Brightness	exp2	1	1828
Uexp2	B1	B	q	523.wav	blue.jpg	Sound-Hue	exp2	0	1347
Uexp2	B1	B	q	130.wav	white.jpg	Sound-Brightness	exp2	0	3308
Uexp2	B1	B	q	523.wav	blue.jpg	Sound-Hue	exp2	0	1331
Uexp2	B1	B	q	130.wav	green.jpg	Control	exp2	1	2391
Uexp2	B1	B	q	130.wav	red.jpg	Sound-Hue	exp2	1	1624
Uexp2	B1	B	q	130.wav	white.jpg	Sound-Brightness	exp2	1	1961
Uexp2	B1	B	p	523.wav	red.jpg	Sound-Hue	exp2	1	1684
Uexp2	B1	B	p	523.wav	green.jpg	Control	exp2	0	2235
Uexp2	B1	B	p	523.wav	red.jpg	Sound-Hue	exp2	1	1898
Uexp2	B1	B	p	130.wav	cyan.jpg	Control	exp2	1	2338
Uexp2	B1	B	p	523.wav	white.jpg	Sound-Brightness	exp2	0	1533
Uexp2	B1	B	p	523.wav	red.jpg	Sound-Hue	exp2	1	1429
Uexp2	B1	B	q	130.wav	white.jpg	Sound-Brightness	exp2	0	2328
Uexp2	B1	B	p	523.wav	green.jpg	Control	exp2	1	1613
Uexp2	B1	B	p	130.wav	black.jpg	Sound-Brightness	exp2	0	2382
Uexp2	B1	B	q	523.wav	cyan.jpg	Control	exp2	0	2017
Uexp2	B1	B	p	130.wav	blue.jpg	Sound-Hue	exp2	1	2630
Uexp2	B1	B	p	130.wav	blue.jpg	Sound-Hue	exp2	1	1583
Uexp2	B1	B	p	130.wav	blue.jpg	Sound-Hue	exp2	1	1309
Uexp2	B1	B	p	523.wav	green.jpg	Control	exp2	1	1689
Uexp2	B1	B	q	130.wav	red.jpg	Sound-Hue	exp2	1	1885
Uexp2	B1	B	q	130.wav	red.jpg	Sound-Hue	exp2	1	1444
Uexp2	B1	B	p	523.wav	red.jpg	Sound-Hue	exp2	1	1760
Uexp2	B1	B	q	523.wav	cyan.jpg	Control	exp2	1	1692
Uexp2	B1	B	q	523.wav	black.jpg	Sound-Brightness	exp2	0	1664
Uexp2	B1	B	q	523.wav	cyan.jpg	Control	exp2	1	1301
Uexp2	B1	B	p	130.wav	cyan.jpg	Control	exp2	1	1215
Uexp2	B1	B	p	130.wav	blue.jpg	Sound-Hue	exp2	0	2597
Uexp2	B1	B	q	130.wav	white.jpg	Sound-Brightness	exp2	0	1424
Uexp2	B1	B	q	523.wav	black.jpg	Sound-Brightness	exp2	0	1392
Uexp2	B1	B	q	523.wav	cyan.jpg	Control	exp2	1	2037
Uexp2	B2	B	p	130.wav	cyan.jpg	Control	exp2	1	2520
Uexp2	B2	B	p	523.wav	red.jpg	Sound-Hue	exp2	1	1863
Uexp2	B2	B	q	523.wav	cyan.jpg	Control	exp2	1	1598
Uexp2	B2	B	p	523.wav	white.jpg	Sound-Brightness	exp2	1	1376
Uexp2	B2	B	p	130.wav	black.jpg	Sound-Brightness	exp2	0	1540
Uexp2	B2	B	q	523.wav	cyan.jpg	Control	exp2	1	2103
Uexp2	B2	B	q	130.wav	red.jpg	Sound-Hue	exp2	0	2433
Uexp2	B2	B	p	523.wav	green.jpg	Control	exp2	1	2141
Uexp2	B2	B	p	130.wav	cyan.jpg	Control	exp2	0	2588
Uexp2	B2	B	p	523.wav	red.jpg	Sound-Hue	exp2	1	2255
Uexp2	B2	B	p	523.wav	red.jpg	Sound-Hue	exp2	1	1393
Uexp2	B2	B	q	523.wav	blue.jpg	Sound-Hue	exp2	1	1717
Uexp2	B2	B	p	130.wav	blue.jpg	Sound-Hue	exp2	1	1854
Uexp2	B2	B	p	523.wav	white.jpg	Sound-Brightness	exp2	1	1681
Uexp2	B2	B	p	130.wav	blue.jpg	Sound-Hue	exp2	1	1610
Uexp2	B2	B	p	523.wav	white.jpg	Sound-Brightness	exp2	1	1819
Uexp2	B2	B	q	523.wav	black.jpg	Sound-Brightness	exp2	1	1375
Uexp2	B2	B	p	523.wav	white.jpg	Sound-Brightness	exp2	1	1686
Uexp2	B2	B	q	523.wav	cyan.jpg	Control	exp2	1	1544
Uexp2	B2	B	q	523.wav	blue.jpg	Sound-Hue	exp2	0	2469
Uexp2	B2	B	q	523.wav	cyan.jpg	Control	exp2	1	2034
Uexp2	B2	B	p	523.wav	green.jpg	Control	exp2	1	3049
Uexp2	B2	B	p	523.wav	red.jpg	Sound-Hue	exp2	1	1856
Uexp2	B2	B	p	523.wav	green.jpg	Control	exp2	0	1920
Uexp2	B2	B	q	130.wav	white.jpg	Sound-Brightness	exp2	1	3266
Uexp2	B2	B	p	130.wav	cyan.jpg	Control	exp2	1	2502
Uexp2	B2	B	q	130.wav	red.jpg	Sound-Hue	exp2	1	1862
Uexp2	B2	B	q	130.wav	green.jpg	Control	exp2	1	1714
Uexp2	B2	B	p	523.wav	white.jpg	Sound-Brightness	exp2	1	1466
Uexp2	B2	B	p	130.wav	black.jpg	Sound-Brightness	exp2	0	2452
Uexp2	B2	B	q	523.wav	blue.jpg	Sound-Hue	exp2	0	1610
Uexp2	B2	B	p	130.wav	cyan.jpg	Control	exp2	1	1842
Uexp2	B2	B	q	523.wav	black.jpg	Sound-Brightness	exp2	1	2273
Uexp2	B2	B	p	523.wav	red.jpg	Sound-Hue	exp2	1	2923
Uexp2	B2	B	p	130.wav	black.jpg	Sound-Brightness	exp2	1	3084
Uexp2	B2	B	p	130.wav	blue.jpg	Sound-Hue	exp2	1	2823
Uexp2	B2	B	p	130.wav	black.jpg	Sound-Brightness	exp2	1	2969
Uexp2	B2	B	q	130.wav	white.jpg	Sound-Brightness	exp2	1	1482
Uexp2	B2	B	q	523.wav	blue.jpg	Sound-Hue	exp2	1	1568
Uexp2	B2	B	p	130.wav	blue.jpg	Sound-Hue	exp2	1	1619
Uexp2	B2	B	q	130.wav	green.jpg	Control	exp2	1	3468
Uexp2	B2	B	q	130.wav	green.jpg	Control	exp2	1	1774
Uexp2	B2	B	q	130.wav	red.jpg	Sound-Hue	exp2	1	1614
Uexp2	B2	B	q	130.wav	red.jpg	Sound-Hue	exp2	1	1618
Uexp2	B2	B	q	130.wav	white.jpg	Sound-Brightness	exp2	1	2336
Uexp2	B2	B	q	523.wav	black.jpg	Sound-Brightness	exp2	1	2624
Uexp2	B2	B	q	130.wav	red.jpg	Sound-Hue	exp2	1	1859
Uexp2	B2	B	q	523.wav	cyan.jpg	Control	exp2	1	2813
Uexp2	B2	B	q	523.wav	black.jpg	Sound-Brightness	exp2	1	2491
Uexp2	B2	B	p	130.wav	cyan.jpg	Control	exp2	1	2695
Uexp2	B2	B	q	523.wav	black.jpg	Sound-Brightness	exp2	1	1990
Uexp2	B2	B	q	523.wav	blue.jpg	Sound-Hue	exp2	1	2135
Uexp2	B2	B	q	130.wav	white.jpg	Sound-Brightness	exp2	0	1732
Uexp2	B2	B	p	130.wav	black.jpg	Sound-Brightness	exp2	1	1290
Uexp2	B2	B	p	523.wav	green.jpg	Control	exp2	1	1908
Uexp2	B2	B	q	130.wav	green.jpg	Control	exp2	1	1372
Uexp2	B2	B	p	130.wav	blue.jpg	Sound-Hue	exp2	0	1119
Uexp2	B2	B	q	130.wav	green.jpg	Control	exp2	1	2876
Uexp2	B2	B	p	523.wav	green.jpg	Control	exp2	1	1800
Uexp2	B2	B	q	130.wav	white.jpg	Sound-Brightness	exp2	1	1811
Uexp2	B3	B	q	523.wav	blue.jpg	Sound-Hue	exp2	0	1809
Uexp2	B3	B	q	130.wav	white.jpg	Sound-Brightness	exp2	1	1445
Uexp2	B3	B	p	523.wav	red.jpg	Sound-Hue	exp2	1	1266
Uexp2	B3	B	q	523.wav	cyan.jpg	Control	exp2	1	1315
Uexp2	B3	B	q	523.wav	cyan.jpg	Control	exp2	1	1533
Uexp2	B3	B	q	523.wav	blue.jpg	Sound-Hue	exp2	1	1674
Uexp2	B3	B	p	130.wav	cyan.jpg	Control	exp2	1	2003
Uexp2	B3	B	q	130.wav	red.jpg	Sound-Hue	exp2	1	1745
Uexp2	B3	B	q	130.wav	red.jpg	Sound-Hue	exp2	1	1358
Uexp2	B3	B	p	130.wav	cyan.jpg	Control	exp2	1	2042
Uexp2	B3	B	q	130.wav	white.jpg	Sound-Brightness	exp2	1	1929
Uexp2	B3	B	q	523.wav	cyan.jpg	Control	exp2	1	2386
Uexp2	B3	B	q	130.wav	red.jpg	Sound-Hue	exp2	1	1849
Uexp2	B3	B	p	523.wav	white.jpg	Sound-Brightness	exp2	1	1798
Uexp2	B3	B	p	130.wav	black.jpg	Sound-Brightness	exp2	1	1369
Uexp2	B3	B	q	523.wav	cyan.jpg	Control	exp2	1	1628
Uexp2	B3	B	p	523.wav	green.jpg	Control	exp2	1	1377
Uexp2	B3	B	p	130.wav	black.jpg	Sound-Brightness	exp2	0	2624
Uexp2	B3	B	p	130.wav	cyan.jpg	Control	exp2	0	2159
Uexp2	B3	B	p	130.wav	blue.jpg	Sound-Hue	exp2	1	1677
Uexp2	B3	B	p	523.wav	green.jpg	Control	exp2	1	1898
Uexp2	B3	B	q	130.wav	green.jpg	Control	exp2	1	1749
Uexp2	B3	B	p	130.wav	cyan.jpg	Control	exp2	1	2331
Uexp2	B3	B	q	130.wav	white.jpg	Sound-Brightness	exp2	1	2074
Uexp2	B3	B	q	523.wav	black.jpg	Sound-Brightness	exp2	1	1423
Uexp2	B3	B	p	523.wav	white.jpg	Sound-Brightness	exp2	1	1262
Uexp2	B3	B	p	130.wav	blue.jpg	Sound-Hue	exp2	1	2165
Uexp2	B3	B	q	130.wav	green.jpg	Control	exp2	0	2127
Uexp2	B3	B	p	523.wav	green.jpg	Control	exp2	1	2145
Uexp2	B3	B	q	523.wav	blue.jpg	Sound-Hue	exp2	1	1225
Uexp2	B3	B	p	130.wav	blue.jpg	Sound-Hue	exp2	1	1620
Uexp2	B3	B	p	523.wav	red.jpg	Sound-Hue	exp2	1	1587
Uexp2	B3	B	p	523.wav	white.jpg	Sound-Brightness	exp2	0	2142
Uexp2	B3	B	p	523.wav	red.jpg	Sound-Hue	exp2	1	1323
Uexp2	B3	B	p	130.wav	blue.jpg	Sound-Hue	exp2	1	1468
Uexp2	B3	B	q	523.wav	cyan.jpg	Control	exp2	1	1716
Uexp2	B3	B	p	523.wav	white.jpg	Sound-Brightness	exp2	1	1693
Uexp2	B3	B	q	523.wav	blue.jpg	Sound-Hue	exp2	1	1499
Uexp2	B3	B	q	130.wav	green.jpg	Control	exp2	1	1862
Uexp2	B3	B	q	130.wav	white.jpg	Sound-Brightness	exp2	0	2640
Uexp2	B3	B	q	130.wav	green.jpg	Control	exp2	0	2312
Uexp2	B3	B	p	130.wav	cyan.jpg	Control	exp2	1	1862
Uexp2	B3	B	q	130.wav	red.jpg	Sound-Hue	exp2	1	1900
Uexp2	B3	B	p	130.wav	blue.jpg	Sound-Hue	exp2	0	2451
Uexp2	B3	B	q	130.wav	green.jpg	Control	exp2	0	2309
Uexp2	B3	B	p	130.wav	black.jpg	Sound-Brightness	exp2	0	2404
Uexp2	B3	B	q	523.wav	black.jpg	Sound-Brightness	exp2	0	1493
Uexp2	B3	B	q	130.wav	white.jpg	Sound-Brightness	exp2	1	2467
Uexp2	B3	B	p	130.wav	black.jpg	Sound-Brightness	exp2	1	2282
Uexp2	B3	B	p	130.wav	black.jpg	Sound-Brightness	exp2	1	2436
Uexp2	B3	B	q	523.wav	black.jpg	Sound-Brightness	exp2	0	1729
Uexp2	B3	B	p	523.wav	green.jpg	Control	exp2	1	3103
Uexp2	B3	B	q	523.wav	black.jpg	Sound-Brightness	exp2	1	1919
Uexp2	B3	B	p	523.wav	red.jpg	Sound-Hue	exp2	1	1531
Uexp2	B3	B	p	523.wav	white.jpg	Sound-Brightness	exp2	1	1619
Uexp2	B3	B	q	130.wav	red.jpg	Sound-Hue	exp2	1	1675
Uexp2	B3	B	p	523.wav	red.jpg	Sound-Hue	exp2	1	2067
Uexp2	B3	B	q	523.wav	blue.jpg	Sound-Hue	exp2	1	3421
Uexp2	B3	B	q	523.wav	black.jpg	Sound-Brightness	exp2	1	1515
Uexp2	B3	B	p	523.wav	green.jpg	Control	exp2	1	1549
Uexp2	B4	B	q	130.wav	white.jpg	Sound-Brightness	exp2	1	1900
Uexp2	B4	B	q	523.wav	black.jpg	Sound-Brightness	exp2	1	1314
Uexp2	B4	B	q	523.wav	cyan.jpg	Control	exp2	1	1576
Uexp2	B4	B	q	523.wav	black.jpg	Sound-Brightness	exp2	1	826
Uexp2	B4	B	p	523.wav	red.jpg	Sound-Hue	exp2	1	908
Uexp2	B4	B	q	523.wav	black.jpg	Sound-Brightness	exp2	1	886
Uexp2	B4	B	q	130.wav	white.jpg	Sound-Brightness	exp2	0	2710
Uexp2	B4	B	p	130.wav	black.jpg	Sound-Brightness	exp2	1	1671
Uexp2	B4	B	p	130.wav	blue.jpg	Sound-Hue	exp2	0	1294
Uexp2	B4	B	q	523.wav	black.jpg	Sound-Brightness	exp2	1	1303
Uexp2	B4	B	p	523.wav	white.jpg	Sound-Brightness	exp2	1	878
Uexp2	B4	B	p	130.wav	cyan.jpg	Control	exp2	0	1699
Uexp2	B4	B	q	130.wav	red.jpg	Sound-Hue	exp2	1	2444
Uexp2	B4	B	q	523.wav	blue.jpg	Sound-Hue	exp2	1	1266
Uexp2	B4	B	p	130.wav	blue.jpg	Sound-Hue	exp2	1	894
Uexp2	B4	B	q	523.wav	cyan.jpg	Control	exp2	1	1629
Uexp2	B4	B	p	523.wav	red.jpg	Sound-Hue	exp2	1	1129
Uexp2	B4	B	q	130.wav	green.jpg	Control	exp2	1	2175
Uexp2	B4	B	q	130.wav	red.jpg	Sound-Hue	exp2	1	1102
Uexp2	B4	B	q	523.wav	blue.jpg	Sound-Hue	exp2	1	950
Uexp2	B4	B	q	130.wav	white.jpg	Sound-Brightness	exp2	0	1489
Uexp2	B4	B	q	523.wav	cyan.jpg	Control	exp2	1	2144
Uexp2	B4	B	p	523.wav	green.jpg	Control	exp2	1	2270
Uexp2	B4	B	p	523.wav	white.jpg	Sound-Brightness	exp2	1	2093
Uexp2	B4	B	q	523.wav	cyan.jpg	Control	exp2	1	2390
Uexp2	B4	B	q	130.wav	green.jpg	Control	exp2	1	1673
Uexp2	B4	B	p	523.wav	green.jpg	Control	exp2	0	1828
Uexp2	B4	B	p	523.wav	green.jpg	Control	exp2	1	1303
Uexp2	B4	B	p	523.wav	white.jpg	Sound-Brightness	exp2	1	1315
Uexp2	B4	B	p	523.wav	green.jpg	Control	exp2	1	2001
Uexp2	B4	B	p	523.wav	white.jpg	Sound-Brightness	exp2	1	1417
Uexp2	B4	B	q	130.wav	green.jpg	Control	exp2	1	2224
Uexp2	B4	B	q	523.wav	blue.jpg	Sound-Hue	exp2	1	1142
Uexp2	B4	B	p	130.wav	cyan.jpg	Control	exp2	1	1415
Uexp2	B4	B	q	523.wav	black.jpg	Sound-Brightness	exp2	1	1015
Uexp2	B4	B	p	130.wav	cyan.jpg	Control	exp2	1	1777
Uexp2	B4	B	p	130.wav	blue.jpg	Sound-Hue	exp2	1	1119
Uexp2	B4	B	p	130.wav	black.jpg	Sound-Brightness	exp2	1	1190
Uexp2	B4	B	q	130.wav	white.jpg	Sound-Brightness	exp2	1	1861
Uexp2	B4	B	q	130.wav	red.jpg	Sound-Hue	exp2	1	869
Uexp2	B4	B	q	130.wav	green.jpg	Control	exp2	1	1949
Uexp2	B4	B	q	130.wav	red.jpg	Sound-Hue	exp2	1	1640
Uexp2	B4	B	p	130.wav	black.jpg	Sound-Brightness	exp2	1	975
Uexp2	B4	B	q	130.wav	white.jpg	Sound-Brightness	exp2	1	1636
Uexp2	B4	B	p	523.wav	red.jpg	Sound-Hue	exp2	1	1199
Uexp2	B4	B	p	130.wav	cyan.jpg	Control	exp2	1	1746
Uexp2	B4	B	p	523.wav	red.jpg	Sound-Hue	exp2	1	1110
Uexp2	B4	B	p	130.wav	blue.jpg	Sound-Hue	exp2	1	1696
Uexp2	B4	B	p	130.wav	black.jpg	Sound-Brightness	exp2	1	1117
Uexp2	B4	B	q	130.wav	red.jpg	Sound-Hue	exp2	0	912
Uexp2	B4	B	q	523.wav	cyan.jpg	Control	exp2	1	2311
Uexp2	B4	B	p	130.wav	black.jpg	Sound-Brightness	exp2	1	1418
Uexp2	B4	B	q	523.wav	blue.jpg	Sound-Hue	exp2	0	1236
Uexp2	B4	B	q	130.wav	green.jpg	Control	exp2	1	4347
Uexp2	B4	B	p	523.wav	red.jpg	Sound-Hue	exp2	1	1247
Uexp2	B4	B	p	130.wav	cyan.jpg	Control	exp2	1	1468
Uexp2	B4	B	p	130.wav	blue.jpg	Sound-Hue	exp2	1	2369
Uexp2	B4	B	p	523.wav	white.jpg	Sound-Brightness	exp2	1	1499
Uexp2	B4	B	p	523.wav	green.jpg	Control	exp2	1	2067
Uexp2	B4	B	q	523.wav	blue.jpg	Sound-Hue	exp2	1	978
Uexp2	B5	B	q	523.wav	black.jpg	Sound-Brightness	exp2	1	2081
Uexp2	B5	B	p	130.wav	blue.jpg	Sound-Hue	exp2	1	1489
Uexp2	B5	B	q	130.wav	red.jpg	Sound-Hue	exp2	1	1524
Uexp2	B5	B	p	523.wav	red.jpg	Sound-Hue	exp2	1	1635
Uexp2	B5	B	p	523.wav	red.jpg	Sound-Hue	exp2	1	1507
Uexp2	B5	B	q	523.wav	blue.jpg	Sound-Hue	exp2	1	1603
Uexp2	B5	B	q	130.wav	white.jpg	Sound-Brightness	exp2	0	1475
Uexp2	B5	B	q	130.wav	green.jpg	Control	exp2	1	2179
Uexp2	B5	B	p	130.wav	black.jpg	Sound-Brightness	exp2	0	2145
Uexp2	B5	B	q	130.wav	red.jpg	Sound-Hue	exp2	1	1615
Uexp2	B5	B	p	523.wav	white.jpg	Sound-Brightness	exp2	1	1609
Uexp2	B5	B	p	523.wav	white.jpg	Sound-Brightness	exp2	1	1484
Uexp2	B5	B	q	523.wav	black.jpg	Sound-Brightness	exp2	1	2207
Uexp2	B5	B	q	523.wav	blue.jpg	Sound-Hue	exp2	1	1826
Uexp2	B5	B	p	523.wav	green.jpg	Control	exp2	0	2346
Uexp2	B5	B	p	523.wav	white.jpg	Sound-Brightness	exp2	1	1534
Uexp2	B5	B	p	523.wav	red.jpg	Sound-Hue	exp2	1	2049
Uexp2	B5	B	p	523.wav	green.jpg	Control	exp2	1	2060
Uexp2	B5	B	q	523.wav	cyan.jpg	Control	exp2	1	1569
Uexp2	B5	B	p	130.wav	blue.jpg	Sound-Hue	exp2	1	1416
Uexp2	B5	B	p	523.wav	green.jpg	Control	exp2	1	1441
Uexp2	B5	B	q	523.wav	black.jpg	Sound-Brightness	exp2	0	1739
Uexp2	B5	B	q	130.wav	green.jpg	Control	exp2	1	3118
Uexp2	B5	B	p	130.wav	cyan.jpg	Control	exp2	1	3140
Uexp2	B5	B	q	130.wav	green.jpg	Control	exp2	1	1847
Uexp2	B5	B	q	523.wav	cyan.jpg	Control	exp2	1	1964
Uexp2	B5	B	q	523.wav	black.jpg	Sound-Brightness	exp2	0	2919
Uexp2	B5	B	p	130.wav	black.jpg	Sound-Brightness	exp2	1	1565
Uexp2	B5	B	q	130.wav	white.jpg	Sound-Brightness	exp2	1	3902
Uexp2	B5	B	q	523.wav	cyan.jpg	Control	exp2	1	2141
Uexp2	B5	B	q	130.wav	white.jpg	Sound-Brightness	exp2	0	2858
Uexp2	B5	B	p	523.wav	green.jpg	Control	exp2	1	2504
Uexp2	B5	B	p	523.wav	white.jpg	Sound-Brightness	exp2	1	2006
Uexp2	B5	B	p	130.wav	blue.jpg	Sound-Hue	exp2	1	2373
Uexp2	B5	B	q	523.wav	cyan.jpg	Control	exp2	1	2764
Uexp2	B5	B	p	130.wav	blue.jpg	Sound-Hue	exp2	1	2230
Uexp2	B5	B	p	130.wav	black.jpg	Sound-Brightness	exp2	1	1737
Uexp2	B5	B	p	130.wav	cyan.jpg	Control	exp2	1	1812
Uexp2	B5	B	p	130.wav	black.jpg	Sound-Brightness	exp2	1	1597
Uexp2	B5	B	q	130.wav	green.jpg	Control	exp2	1	1698
Uexp2	B5	B	q	523.wav	black.jpg	Sound-Brightness	exp2	0	1859
Uexp2	B5	B	p	130.wav	cyan.jpg	Control	exp2	1	2568
Uexp2	B5	B	p	523.wav	red.jpg	Sound-Hue	exp2	1	1656
Uexp2	B5	B	q	130.wav	white.jpg	Sound-Brightness	exp2	0	2681
Uexp2	B5	B	q	523.wav	blue.jpg	Sound-Hue	exp2	1	3320
Uexp2	B5	B	p	523.wav	white.jpg	Sound-Brightness	exp2	1	1748
Uexp2	B5	B	q	130.wav	red.jpg	Sound-Hue	exp2	1	1448
Uexp2	B5	B	q	130.wav	white.jpg	Sound-Brightness	exp2	1	2583
Uexp2	B5	B	p	523.wav	red.jpg	Sound-Hue	exp2	1	1901
Uexp2	B5	B	p	130.wav	blue.jpg	Sound-Hue	exp2	1	2389
Uexp2	B5	B	q	523.wav	blue.jpg	Sound-Hue	exp2	1	3241
Uexp2	B5	B	q	130.wav	red.jpg	Sound-Hue	exp2	1	2087
Uexp2	B5	B	q	523.wav	blue.jpg	Sound-Hue	exp2	1	1533
Uexp2	B5	B	q	523.wav	cyan.jpg	Control	exp2	1	2033
Uexp2	B5	B	p	130.wav	black.jpg	Sound-Brightness	exp2	1	2010
Uexp2	B5	B	p	523.wav	green.jpg	Control	exp2	1	2006
Uexp2	B5	B	p	130.wav	cyan.jpg	Control	exp2	0	2213
Uexp2	B5	B	q	130.wav	red.jpg	Sound-Hue	exp2	0	2813
Uexp2	B5	B	p	130.wav	cyan.jpg	Control	exp2	1	2373
Uexp2	B5	B	q	130.wav	green.jpg	Control	exp2	1	3116
Uexp2	B6	B	p	523.wav	green.jpg	Control	exp2	1	2210
Uexp2	B6	B	q	130.wav	white.jpg	Sound-Brightness	exp2	1	2210
Uexp2	B6	B	p	130.wav	cyan.jpg	Control	exp2	1	3901
Uexp2	B6	B	q	523.wav	black.jpg	Sound-Brightness	exp2	1	2974
Uexp2	B6	B	q	523.wav	black.jpg	Sound-Brightness	exp2	1	1496
Uexp2	B6	B	p	130.wav	cyan.jpg	Control	exp2	0	3439
Uexp2	B6	B	q	130.wav	white.jpg	Sound-Brightness	exp2	1	2536
Uexp2	B6	B	q	523.wav	blue.jpg	Sound-Hue	exp2	1	3932
Uexp2	B6	B	q	130.wav	white.jpg	Sound-Brightness	exp2	1	2816
Uexp2	B6	B	q	130.wav	red.jpg	Sound-Hue	exp2	1	2942
Uexp2	B6	B	q	130.wav	red.jpg	Sound-Hue	exp2	1	2363
Uexp2	B6	B	p	523.wav	red.jpg	Sound-Hue	exp2	1	2505
Uexp2	B6	B	p	130.wav	black.jpg	Sound-Brightness	exp2	0	3253
Uexp2	B6	B	p	130.wav	blue.jpg	Sound-Hue	exp2	1	3299
Uexp2	B6	B	q	523.wav	blue.jpg	Sound-Hue	exp2	1	2676
Uexp2	B6	B	q	130.wav	red.jpg	Sound-Hue	exp2	1	2470
Uexp2	B6	B	p	523.wav	green.jpg	Control	exp2	1	4171
Uexp2	B6	B	q	523.wav	black.jpg	Sound-Brightness	exp2	1	2085
Uexp2	B6	B	p	523.wav	white.jpg	Sound-Brightness	exp2	1	1934
Uexp2	B6	B	q	523.wav	black.jpg	Sound-Brightness	exp2	1	2597
Uexp2	B6	B	p	523.wav	green.jpg	Control	exp2	1	4612
Uexp2	B6	B	q	523.wav	blue.jpg	Sound-Hue	exp2	1	1975
Uexp2	B6	B	q	523.wav	cyan.jpg	Control	exp2	1	2728
Uexp2	B6	B	q	523.wav	black.jpg	Sound-Brightness	exp2	1	2354
Uexp2	B6	B	p	523.wav	white.jpg	Sound-Brightness	exp2	1	1709
Uexp2	B6	B	q	130.wav	red.jpg	Sound-Hue	exp2	1	2307
Uexp2	B6	B	p	523.wav	white.jpg	Sound-Brightness	exp2	1	2250
Uexp2	B6	B	q	130.wav	white.jpg	Sound-Brightness	exp2	1	2296
Uexp2	B6	B	p	130.wav	blue.jpg	Sound-Hue	exp2	1	2220
Uexp2	B6	B	p	130.wav	blue.jpg	Sound-Hue	exp2	1	2803
Uexp2	B6	B	q	523.wav	cyan.jpg	Control	exp2	1	3110
Uexp2	B6	B	q	130.wav	green.jpg	Control	exp2	0	2110
Uexp2	B6	B	p	523.wav	red.jpg	Sound-Hue	exp2	1	2236
Uexp2	B6	B	q	130.wav	green.jpg	Control	exp2	1	3472
Uexp2	B6	B	p	130.wav	black.jpg	Sound-Brightness	exp2	1	2399
Uexp2	B6	B	p	523.wav	green.jpg	Control	exp2	1	2429
Uexp2	B6	B	q	130.wav	green.jpg	Control	exp2	1	1884
Uexp2	B6	B	q	130.wav	red.jpg	Sound-Hue	exp2	1	1611
Uexp2	B6	B	p	130.wav	black.jpg	Sound-Brightness	exp2	1	1870
Uexp2	B6	B	p	130.wav	blue.jpg	Sound-Hue	exp2	1	2714
Uexp2	B6	B	p	130.wav	cyan.jpg	Control	exp2	0	3560
Uexp2	B6	B	q	130.wav	white.jpg	Sound-Brightness	exp2	1	1943
Uexp2	B6	B	q	523.wav	blue.jpg	Sound-Hue	exp2	1	2357
Uexp2	B6	B	p	130.wav	black.jpg	Sound-Brightness	exp2	1	2346
Uexp2	B6	B	p	523.wav	green.jpg	Control	exp2	1	2340
Uexp2	B6	B	q	130.wav	green.jpg	Control	exp2	1	2387
Uexp2	B6	B	p	523.wav	white.jpg	Sound-Brightness	exp2	1	3144
Uexp2	B6	B	q	523.wav	cyan.jpg	Control	exp2	1	3582
Uexp2	B6	B	q	523.wav	cyan.jpg	Control	exp2	1	2063
Uexp2	B6	B	p	130.wav	cyan.jpg	Control	exp2	1	1674
Uexp2	B6	B	q	130.wav	green.jpg	Control	exp2	0	2602
Uexp2	B6	B	p	523.wav	red.jpg	Sound-Hue	exp2	1	2129
Uexp2	B6	B	p	523.wav	white.jpg	Sound-Brightness	exp2	1	2528
Uexp2	B6	B	p	523.wav	red.jpg	Sound-Hue	exp2	1	1743
Uexp2	B6	B	p	130.wav	cyan.jpg	Control	exp2	1	2432
Uexp2	B6	B	p	130.wav	blue.jpg	Sound-Hue	exp2	1	2019
Uexp2	B6	B	q	523.wav	cyan.jpg	Control	exp2	1	1656
Uexp2	B6	B	q	523.wav	blue.jpg	Sound-Hue	exp2	1	1820
Uexp2	B6	B	p	523.wav	red.jpg	Sound-Hue	exp2	1	1974
Uexp2	B6	B	p	130.wav	black.jpg	Sound-Brightness	exp2	1	1839
Uexp2	B7	B	p	130.wav	blue.jpg	Sound-Hue	exp2	0	1036
Uexp2	B7	B	q	523.wav	black.jpg	Sound-Brightness	exp2	1	1590
Uexp2	B7	B	p	130.wav	blue.jpg	Sound-Hue	exp2	1	2148
Uexp2	B7	B	p	523.wav	red.jpg	Sound-Hue	exp2	1	1504
Uexp2	B7	B	q	130.wav	green.jpg	Control	exp2	1	2004
Uexp2	B7	B	p	130.wav	black.jpg	Sound-Brightness	exp2	1	1582
Uexp2	B7	B	p	130.wav	blue.jpg	Sound-Hue	exp2	0	2681
Uexp2	B7	B	p	523.wav	green.jpg	Control	exp2	1	1680
Uexp2	B7	B	p	523.wav	red.jpg	Sound-Hue	exp2	1	1493
Uexp2	B7	B	p	130.wav	cyan.jpg	Control	exp2	1	2042
Uexp2	B7	B	p	130.wav	black.jpg	Sound-Brightness	exp2	1	1634
Uexp2	B7	B	p	130.wav	black.jpg	Sound-Brightness	exp2	1	1504
Uexp2	B7	B	q	523.wav	blue.jpg	Sound-Hue	exp2	1	1922
Uexp2	B7	B	q	130.wav	red.jpg	Sound-Hue	exp2	0	1863
Uexp2	B7	B	q	523.wav	black.jpg	Sound-Brightness	exp2	0	1634
Uexp2	B7	B	q	130.wav	green.jpg	Control	exp2	1	1765
Uexp2	B7	B	q	523.wav	blue.jpg	Sound-Hue	exp2	1	1475
Uexp2	B7	B	q	130.wav	red.jpg	Sound-Hue	exp2	1	1668
Uexp2	B7	B	q	523.wav	black.jpg	Sound-Brightness	exp2	1	1363
Uexp2	B7	B	p	523.wav	green.jpg	Control	exp2	1	1544
Uexp2	B7	B	p	523.wav	green.jpg	Control	exp2	1	1405
Uexp2	B7	B	q	523.wav	blue.jpg	Sound-Hue	exp2	1	1780
Uexp2	B7	B	q	130.wav	white.jpg	Sound-Brightness	exp2	1	2099
Uexp2	B7	B	q	523.wav	black.jpg	Sound-Brightness	exp2	1	3192
Uexp2	B7	B	q	523.wav	blue.jpg	Sound-Hue	exp2	0	1561
Uexp2	B7	B	p	523.wav	red.jpg	Sound-Hue	exp2	1	1388
Uexp2	B7	B	q	523.wav	cyan.jpg	Control	exp2	1	1777
Uexp2	B7	B	q	130.wav	green.jpg	Control	exp2	0	1353
Uexp2	B7	B	p	130.wav	cyan.jpg	Control	exp2	1	1726
Uexp2	B7	B	q	523.wav	cyan.jpg	Control	exp2	1	1700
Uexp2	B7	B	p	523.wav	white.jpg	Sound-Brightness	exp2	0	1324
Uexp2	B7	B	q	523.wav	cyan.jpg	Control	exp2	0	1370
Uexp2	B7	B	q	130.wav	white.jpg	Sound-Brightness	exp2	1	1410
Uexp2	B7	B	p	523.wav	green.jpg	Control	exp2	1	2101
Uexp2	B7	B	p	130.wav	black.jpg	Sound-Brightness	exp2	1	1842
Uexp2	B7	B	q	523.wav	black.jpg	Sound-Brightness	exp2	1	1554
Uexp2	B7	B	p	130.wav	black.jpg	Sound-Brightness	exp2	1	1501
Uexp2	B7	B	p	523.wav	white.jpg	Sound-Brightness	exp2	0	1396
Uexp2	B7	B	q	523.wav	cyan.jpg	Control	exp2	0	2356
Uexp2	B7	B	q	523.wav	blue.jpg	Sound-Hue	exp2	0	1734
Uexp2	B7	B	q	130.wav	green.jpg	Control	exp2	1	2579
Uexp2	B7	B	q	130.wav	green.jpg	Control	exp2	1	1915
Uexp2	B7	B	p	130.wav	blue.jpg	Sound-Hue	exp2	1	1731
Uexp2	B7	B	q	130.wav	white.jpg	Sound-Brightness	exp2	1	1859
Uexp2	B7	B	p	523.wav	red.jpg	Sound-Hue	exp2	1	1809
Uexp2	B7	B	p	130.wav	cyan.jpg	Control	exp2	1	1667
Uexp2	B7	B	q	130.wav	white.jpg	Sound-Brightness	exp2	1	1964
Uexp2	B7	B	q	523.wav	cyan.jpg	Control	exp2	1	1835
Uexp2	B7	B	p	523.wav	white.jpg	Sound-Brightness	exp2	0	1356
Uexp2	B7	B	q	130.wav	red.jpg	Sound-Hue	exp2	0	1832
Uexp2	B7	B	q	130.wav	red.jpg	Sound-Hue	exp2	0	1749
Uexp2	B7	B	p	523.wav	white.jpg	Sound-Brightness	exp2	1	2021
Uexp2	B7	B	p	523.wav	green.jpg	Control	exp2	1	1821
Uexp2	B7	B	p	523.wav	red.jpg	Sound-Hue	exp2	1	1723
Uexp2	B7	B	p	130.wav	cyan.jpg	Control	exp2	1	2008
Uexp2	B7	B	q	130.wav	red.jpg	Sound-Hue	exp2	1	1439
Uexp2	B7	B	q	130.wav	white.jpg	Sound-Brightness	exp2	1	1641
Uexp2	B7	B	p	130.wav	blue.jpg	Sound-Hue	exp2	1	1460
Uexp2	B7	B	p	523.wav	white.jpg	Sound-Brightness	exp2	1	1815
Uexp2	B7	B	p	130.wav	cyan.jpg	Control	exp2	0	1425
Uexp2	B8	B	q	523.wav	blue.jpg	Sound-Hue	exp2	0	1701
Uexp2	B8	B	p	523.wav	red.jpg	Sound-Hue	exp2	1	1560
Uexp2	B8	B	p	523.wav	green.jpg	Control	exp2	0	1544
Uexp2	B8	B	p	130.wav	blue.jpg	Sound-Hue	exp2	1	1716
Uexp2	B8	B	q	523.wav	blue.jpg	Sound-Hue	exp2	1	1649
Uexp2	B8	B	p	130.wav	black.jpg	Sound-Brightness	exp2	1	2251
Uexp2	B8	B	p	130.wav	black.jpg	Sound-Brightness	exp2	1	2033
Uexp2	B8	B	q	523.wav	cyan.jpg	Control	exp2	1	1936
Uexp2	B8	B	q	523.wav	cyan.jpg	Control	exp2	1	2027
Uexp2	B8	B	q	130.wav	green.jpg	Control	exp2	1	2141
Uexp2	B8	B	p	523.wav	white.jpg	Sound-Brightness	exp2	1	1714
Uexp2	B8	B	p	130.wav	black.jpg	Sound-Brightness	exp2	1	2528
Uexp2	B8	B	q	130.wav	green.jpg	Control	exp2	0	1971
Uexp2	B8	B	q	523.wav	black.jpg	Sound-Brightness	exp2	1	1562
Uexp2	B8	B	q	130.wav	red.jpg	Sound-Hue	exp2	1	2266
Uexp2	B8	B	q	130.wav	red.jpg	Sound-Hue	exp2	1	2122
Uexp2	B8	B	p	523.wav	green.jpg	Control	exp2	1	2115
Uexp2	B8	B	q	523.wav	cyan.jpg	Control	exp2	1	2003
Uexp2	B8	B	p	523.wav	white.jpg	Sound-Brightness	exp2	1	2003
Uexp2	B8	B	q	130.wav	green.jpg	Control	exp2	0	1925
Uexp2	B8	B	p	523.wav	green.jpg	Control	exp2	1	2134
Uexp2	B8	B	q	130.wav	white.jpg	Sound-Brightness	exp2	1	2547
Uexp2	B8	B	p	523.wav	green.jpg	Control	exp2	1	2018
Uexp2	B8	B	p	130.wav	cyan.jpg	Control	exp2	1	2378
Uexp2	B8	B	p	130.wav	cyan.jpg	Control	exp2	1	2237
Uexp2	B8	B	p	523.wav	red.jpg	Sound-Hue	exp2	1	1932
Uexp2	B8	B	p	130.wav	cyan.jpg	Control	exp2	1	2083
Uexp2	B8	B	p	523.wav	white.jpg	Sound-Brightness	exp2	1	1893
Uexp2	B8	B	q	130.wav	white.jpg	Sound-Brightness	exp2	1	1923
Uexp2	B8	B	q	130.wav	white.jpg	Sound-Brightness	exp2	1	2017
Uexp2	B8	B	p	130.wav	black.jpg	Sound-Brightness	exp2	1	2092
Uexp2	B8	B	q	523.wav	blue.jpg	Sound-Hue	exp2	0	2511
Uexp2	B8	B	p	523.wav	green.jpg	Control	exp2	1	2037
Uexp2	B8	B	p	523.wav	red.jpg	Sound-Hue	exp2	1	1914
Uexp2	B8	B	q	130.wav	white.jpg	Sound-Brightness	exp2	1	1897
Uexp2	B8	B	q	523.wav	black.jpg	Sound-Brightness	exp2	0	2032
Uexp2	B8	B	p	523.wav	white.jpg	Sound-Brightness	exp2	1	1898
Uexp2	B8	B	q	130.wav	red.jpg	Sound-Hue	exp2	1	2231
Uexp2	B8	B	q	130.wav	white.jpg	Sound-Brightness	exp2	0	2362
Uexp2	B8	B	p	130.wav	blue.jpg	Sound-Hue	exp2	1	1823
Uexp2	B8	B	p	523.wav	red.jpg	Sound-Hue	exp2	1	2462
Uexp2	B8	B	p	523.wav	white.jpg	Sound-Brightness	exp2	1	1792
Uexp2	B8	B	q	523.wav	cyan.jpg	Control	exp2	1	1916
Uexp2	B8	B	p	130.wav	cyan.jpg	Control	exp2	1	1957
Uexp2	B8	B	q	523.wav	black.jpg	Sound-Brightness	exp2	1	1944
Uexp2	B8	B	q	130.wav	red.jpg	Sound-Hue	exp2	0	1674
Uexp2	B8	B	p	130.wav	blue.jpg	Sound-Hue	exp2	1	3155
Uexp2	B8	B	q	523.wav	blue.jpg	Sound-Hue	exp2	1	1713
Uexp2	B8	B	q	523.wav	black.jpg	Sound-Brightness	exp2	0	1689
Uexp2	B8	B	p	130.wav	blue.jpg	Sound-Hue	exp2	1	2005
Uexp2	B8	B	q	130.wav	red.jpg	Sound-Hue	exp2	1	1510
Uexp2	B8	B	q	130.wav	green.jpg	Control	exp2	1	2406
Uexp2	B8	B	q	523.wav	black.jpg	Sound-Brightness	exp2	1	2298
Uexp2	B8	B	p	130.wav	blue.jpg	Sound-Hue	exp2	0	2430
Uexp2	B8	B	q	130.wav	green.jpg	Control	exp2	0	1861
Uexp2	B8	B	p	130.wav	black.jpg	Sound-Brightness	exp2	0	2503
Uexp2	B8	B	q	523.wav	cyan.jpg	Control	exp2	1	2626
Uexp2	B8	B	p	130.wav	cyan.jpg	Control	exp2	1	1749
Uexp2	B8	B	q	523.wav	blue.jpg	Sound-Hue	exp2	0	1582
Uexp2	B8	B	p	523.wav	red.jpg	Sound-Hue	exp2	1	1442
Uexp2	B9	B	p	130.wav	blue.jpg	Sound-Hue	exp2	1	1327
Uexp2	B9	B	p	523.wav	white.jpg	Sound-Brightness	exp2	1	1298
Uexp2	B9	B	q	523.wav	cyan.jpg	Control	exp2	1	1655
Uexp2	B9	B	q	523.wav	black.jpg	Sound-Brightness	exp2	1	1946
Uexp2	B9	B	q	523.wav	blue.jpg	Sound-Hue	exp2	1	1424
Uexp2	B9	B	q	523.wav	black.jpg	Sound-Brightness	exp2	1	1750
Uexp2	B9	B	p	523.wav	red.jpg	Sound-Hue	exp2	1	1408
Uexp2	B9	B	q	130.wav	white.jpg	Sound-Brightness	exp2	0	1510
Uexp2	B9	B	q	523.wav	blue.jpg	Sound-Hue	exp2	1	1702
Uexp2	B9	B	q	130.wav	white.jpg	Sound-Brightness	exp2	1	1523
Uexp2	B9	B	p	130.wav	cyan.jpg	Control	exp2	1	1537
Uexp2	B9	B	q	523.wav	black.jpg	Sound-Brightness	exp2	1	1806
Uexp2	B9	B	p	130.wav	blue.jpg	Sound-Hue	exp2	1	2250
Uexp2	B9	B	p	523.wav	white.jpg	Sound-Brightness	exp2	0	1468
Uexp2	B9	B	q	130.wav	green.jpg	Control	exp2	1	1796
Uexp2	B9	B	q	130.wav	green.jpg	Control	exp2	0	1452
Uexp2	B9	B	p	130.wav	cyan.jpg	Control	exp2	1	1923
Uexp2	B9	B	p	130.wav	black.jpg	Sound-Brightness	exp2	1	2093
Uexp2	B9	B	q	130.wav	red.jpg	Sound-Hue	exp2	1	1732
Uexp2	B9	B	q	523.wav	cyan.jpg	Control	exp2	1	1579
Uexp2	B9	B	q	130.wav	green.jpg	Control	exp2	1	1777
Uexp2	B9	B	p	130.wav	black.jpg	Sound-Brightness	exp2	1	1715
Uexp2	B9	B	q	130.wav	red.jpg	Sound-Hue	exp2	1	1717
Uexp2	B9	B	q	130.wav	white.jpg	Sound-Brightness	exp2	1	1543
Uexp2	B9	B	q	130.wav	red.jpg	Sound-Hue	exp2	1	2227
Uexp2	B9	B	p	130.wav	blue.jpg	Sound-Hue	exp2	1	2019
Uexp2	B9	B	p	523.wav	white.jpg	Sound-Brightness	exp2	1	1888
Uexp2	B9	B	p	523.wav	green.jpg	Control	exp2	1	1801
Uexp2	B9	B	p	130.wav	blue.jpg	Sound-Hue	exp2	1	1759
Uexp2	B9	B	q	130.wav	white.jpg	Sound-Brightness	exp2	1	1574
Uexp2	B9	B	q	130.wav	green.jpg	Control	exp2	0	1550
Uexp2	B9	B	q	523.wav	cyan.jpg	Control	exp2	1	1646
Uexp2	B9	B	p	130.wav	cyan.jpg	Control	exp2	1	2177
Uexp2	B9	B	p	523.wav	green.jpg	Control	exp2	0	2228
Uexp2	B9	B	q	130.wav	white.jpg	Sound-Brightness	exp2	1	1689
Uexp2	B9	B	p	523.wav	red.jpg	Sound-Hue	exp2	1	1774
Uexp2	B9	B	q	130.wav	red.jpg	Sound-Hue	exp2	1	1690
Uexp2	B9	B	p	523.wav	red.jpg	Sound-Hue	exp2	1	1606
Uexp2	B9	B	q	523.wav	cyan.jpg	Control	exp2	1	1769
Uexp2	B9	B	p	130.wav	cyan.jpg	Control	exp2	1	2235
Uexp2	B9	B	q	523.wav	blue.jpg	Sound-Hue	exp2	1	1782
Uexp2	B9	B	p	130.wav	black.jpg	Sound-Brightness	exp2	1	1751
Uexp2	B9	B	q	130.wav	green.jpg	Control	exp2	1	1726
Uexp2	B9	B	q	523.wav	cyan.jpg	Control	exp2	1	2058
Uexp2	B9	B	q	523.wav	blue.jpg	Sound-Hue	exp2	1	2023
Uexp2	B9	B	p	130.wav	cyan.jpg	Control	exp2	1	2192
Uexp2	B9	B	p	523.wav	green.jpg	Control	exp2	0	2006
Uexp2	B9	B	p	523.wav	red.jpg	Sound-Hue	exp2	0	1933
Uexp2	B9	B	p	130.wav	blue.jpg	Sound-Hue	exp2	1	2415
Uexp2	B9	B	q	130.wav	red.jpg	Sound-Hue	exp2	1	1578
Uexp2	B9	B	p	130.wav	black.jpg	Sound-Brightness	exp2	1	2084
Uexp2	B9	B	q	523.wav	black.jpg	Sound-Brightness	exp2	1	1923
Uexp2	B9	B	p	523.wav	red.jpg	Sound-Hue	exp2	0	1764
Uexp2	B9	B	p	130.wav	black.jpg	Sound-Brightness	exp2	1	2059
Uexp2	B9	B	q	523.wav	black.jpg	Sound-Brightness	exp2	1	1742
Uexp2	B9	B	p	523.wav	white.jpg	Sound-Brightness	exp2	1	1761
Uexp2	B9	B	p	523.wav	white.jpg	Sound-Brightness	exp2	1	1597
Uexp2	B9	B	q	523.wav	blue.jpg	Sound-Hue	exp2	1	1552
Uexp2	B9	B	p	523.wav	green.jpg	Control	exp2	1	1485
Uexp2	B9	B	p	523.wav	green.jpg	Control	exp2	0	1968
Uexp2	B10	B	q	523.wav	blue.jpg	Sound-Hue	exp2	1	1434
Uexp2	B10	B	q	523.wav	blue.jpg	Sound-Hue	exp2	1	1331
Uexp2	B10	B	q	523.wav	blue.jpg	Sound-Hue	exp2	1	1305
Uexp2	B10	B	p	130.wav	blue.jpg	Sound-Hue	exp2	1	1464
Uexp2	B10	B	p	130.wav	black.jpg	Sound-Brightness	exp2	0	2075
Uexp2	B10	B	q	130.wav	red.jpg	Sound-Hue	exp2	1	2207
Uexp2	B10	B	p	523.wav	red.jpg	Sound-Hue	exp2	1	1826
Uexp2	B10	B	p	523.wav	white.jpg	Sound-Brightness	exp2	1	1327
Uexp2	B10	B	q	523.wav	cyan.jpg	Control	exp2	1	1658
Uexp2	B10	B	q	130.wav	white.jpg	Sound-Brightness	exp2	1	2081
Uexp2	B10	B	p	130.wav	blue.jpg	Sound-Hue	exp2	1	1935
Uexp2	B10	B	p	523.wav	white.jpg	Sound-Brightness	exp2	1	1913
Uexp2	B10	B	q	130.wav	green.jpg	Control	exp2	0	1859
Uexp2	B10	B	q	130.wav	red.jpg	Sound-Hue	exp2	1	1697
Uexp2	B10	B	p	130.wav	black.jpg	Sound-Brightness	exp2	1	1738
Uexp2	B10	B	p	130.wav	blue.jpg	Sound-Hue	exp2	1	1861
Uexp2	B10	B	p	523.wav	green.jpg	Control	exp2	1	1663
Uexp2	B10	B	p	130.wav	cyan.jpg	Control	exp2	1	1681
Uexp2	B10	B	p	523.wav	red.jpg	Sound-Hue	exp2	1	2067
Uexp2	B10	B	q	523.wav	cyan.jpg	Control	exp2	1	1661
Uexp2	B10	B	q	130.wav	white.jpg	Sound-Brightness	exp2	0	1517
Uexp2	B10	B	q	130.wav	green.jpg	Control	exp2	1	1920
Uexp2	B10	B	q	130.wav	green.jpg	Control	exp2	1	1624
Uexp2	B10	B	p	523.wav	white.jpg	Sound-Brightness	exp2	1	1858
Uexp2	B10	B	q	130.wav	white.jpg	Sound-Brightness	exp2	1	1653
Uexp2	B10	B	p	523.wav	red.jpg	Sound-Hue	exp2	1	1592
Uexp2	B10	B	q	523.wav	cyan.jpg	Control	exp2	1	1637
Uexp2	B10	B	p	130.wav	black.jpg	Sound-Brightness	exp2	0	1532
Uexp2	B10	B	p	523.wav	red.jpg	Sound-Hue	exp2	1	1645
Uexp2	B10	B	p	523.wav	green.jpg	Control	exp2	1	1676
Uexp2	B10	B	p	523.wav	green.jpg	Control	exp2	1	2036
Uexp2	B10	B	q	130.wav	white.jpg	Sound-Brightness	exp2	1	1497
Uexp2	B10	B	p	130.wav	black.jpg	Sound-Brightness	exp2	1	1346
Uexp2	B10	B	q	523.wav	cyan.jpg	Control	exp2	1	2421
Uexp2	B10	B	p	130.wav	cyan.jpg	Control	exp2	1	1903
Uexp2	B10	B	p	130.wav	cyan.jpg	Control	exp2	1	1523
Uexp2	B10	B	q	523.wav	black.jpg	Sound-Brightness	exp2	0	1856
Uexp2	B10	B	p	523.wav	green.jpg	Control	exp2	1	1742
Uexp2	B10	B	q	130.wav	green.jpg	Control	exp2	1	2172
Uexp2	B10	B	p	130.wav	cyan.jpg	Control	exp2	1	1906
Uexp2	B10	B	q	523.wav	black.jpg	Sound-Brightness	exp2	1	1777
Uexp2	B10	B	q	523.wav	cyan.jpg	Control	exp2	1	2369
Uexp2	B10	B	q	130.wav	white.jpg	Sound-Brightness	exp2	1	1791
Uexp2	B10	B	p	130.wav	black.jpg	Sound-Brightness	exp2	0	1893
Uexp2	B10	B	q	523.wav	black.jpg	Sound-Brightness	exp2	0	1833
Uexp2	B10	B	q	130.wav	red.jpg	Sound-Hue	exp2	1	2723
Uexp2	B10	B	p	130.wav	blue.jpg	Sound-Hue	exp2	1	2487
Uexp2	B10	B	q	523.wav	black.jpg	Sound-Brightness	exp2	1	1095
Uexp2	B10	B	q	130.wav	green.jpg	Control	exp2	0	2300
Uexp2	B10	B	q	523.wav	black.jpg	Sound-Brightness	exp2	1	1656
Uexp2	B10	B	q	523.wav	blue.jpg	Sound-Hue	exp2	1	1414
Uexp2	B10	B	p	130.wav	blue.jpg	Sound-Hue	exp2	1	1425
Uexp2	B10	B	p	523.wav	white.jpg	Sound-Brightness	exp2	1	1378
Uexp2	B10	B	p	523.wav	green.jpg	Control	exp2	1	1471
Uexp2	B10	B	p	130.wav	cyan.jpg	Control	exp2	1	1527
Uexp2	B10	B	q	523.wav	blue.jpg	Sound-Hue	exp2	0	1403
Uexp2	B10	B	p	523.wav	white.jpg	Sound-Brightness	exp2	1	2063
Uexp2	B10	B	p	523.wav	red.jpg	Sound-Hue	exp2	1	2334
Uexp2	B10	B	q	130.wav	red.jpg	Sound-Hue	exp2	1	1562
Uexp2	B10	B	q	130.wav	red.jpg	Sound-Hue	exp2	1	1741

## Sheet: Sound-brightness
RTs						ACC
Congruent (Group A)			Incongruent (Group B)			Congruent (Group A)			Incongruent (Group B)
S-Brightness	S-Hue	Control	S-Brightness	S-Hue	Control	S-Brightness	S-Hue	Control	S-Brightness	S-Hue	Control
1672	808	1845	1424	1577	1611	1	1	0	1	1	1
976	1091	1818	1317	2131	2185	1	1	0	1	1	0
704	1014	1805	1225	1513	2754	1	1	1	1	1	1
844	801	1713	2040	1518	3076	1	1	1	1	0	1
870	985	1808	1700	2987	2491	1	1	0	1	1	1
948	875	1929	1893	1417	2337	1	1	1	1	1	1
1019	912	1885	1366	1657	3339	1	1	0	1	1	1
830	899	2101	2439	1347	1684	1	1	1	1	0	0
806	801	2113	1593	1331	1313	1	1	1	0	0	0
861	1353	1970	1308	1624	2637	1	1	1	1	1	1
1114	823	2142	1949	1684	2391	1	1	1	1	1	1
1075	762	1986	1828	1898	2235	1	1	1	1	1	0
728	814	1857	3308	1429	2338	1	1	1	0	1	1
884	964	2119	1961	2630	1613	1	1	1	1	1	1
919	880	2159	1533	1583	2017	0	1	1	0	1	0
749	1199	2098	2328	1309	1689	1	1	1	0	1	1
993	1013	1891	2382	1885	1692	1	1	1	0	1	1
869	857	1883	1664	1444	1301	1	1	1	0	1	1
1403	722	1736	1424	1760	1215	1	1	0	0	1	1
783	834	2129	1392	2597	2037	1	1	1	0	0	1
991	813	1914	1376	1863	2520	1	1	1	1	1	1
926	1742	1919	1540	2433	1598	1	1	0	0	0	1
793	862	1967	1681	2255	2103	1	1	1	1	1	1
848	787	2115	1819	1393	2141	1	1	1	1	1	1
611	683	2066	1375	1717	2588	1	1	0	1	1	0
692	799	1977	1686	1854	1544	1	1	1	1	1	1
800	977	1855	3266	1610	2034	1	1	1	1	1	1
504	998	1859	1466	2469	3049	1	1	0	1	0	1
808	781	1972	2452	1856	1920	1	1	1	0	1	0
826	782	2021	2273	1862	2502	0	1	1	1	1	1
989	860	2021	3084	1610	1714	1	1	0	1	0	1
861	749	1990	2969	2923	1842	1	1	1	1	1	1
644	768	2006	1482	2823	3468	1	1	0	1	1	1
643	752	1836	2336	1568	1774	1	0	1	1	1	1
687	867	1761	2624	1619	2813	1	1	0	1	1	1
688	757	2027	2491	1614	2695	1	1	1	1	1	1
1286	735	1876	1990	1618	1908	1	1	1	1	1	1
704	778	1805	1732	1859	1372	1	0	1	0	1	1
784	703	1797	1290	2135	2876	1	1	1	1	1	1
735	692	1618	1811	1119	1800	1	1	1	1	0	1
1179	861	3231	1445	1809	1315	1	1	1	1	0	1
1211	1410	1871	1929	1266	1533	1	1	1	1	1	1
1412	687	1876	1798	1674	2003	1	1	1	1	1	1
1050	933	2031	1369	1745	2042	1	1	1	1	1	1
1093	1601	2080	2624	1358	2386	1	1	1	0	1	1
1226	1101	2078	2074	1849	1628	1	1	1	1	1	1
1234	1059	1891	1423	1677	1377	1	1	1	1	1	1
1701	1231	2686	1262	2165	2159	1	1	1	1	1	0
817	1059	3214	2142	1225	1898	1	1	1	0	1	1
1456	1288	1923	1693	1620	1749	1	1	1	1	1	1
921	1388	2701	2640	1587	2331	1	1	1	0	1	1
1103	1154	1913	2404	1323	2127	0	1	1	0	1	0
834	901	1792	1493	1468	2145	1	1	1	0	1	1
1290	2904	1739	2467	1499	1716	1	1	1	1	1	1
1257	1784	2415	2282	1900	1862	1	1	1	1	1	1
1302	2354	3480	2436	2451	2312	1	1	1	1	0	0
2767	3748	1995	1729	1531	1862	1	0	1	0	1	1
1197	1067	2195	1919	1675	2309	1	1	1	1	1	0
3805	4162	3600	1619	2067	3103	1	1	1	1	1	1
1067	1642	2482	1515	3421	1549	1	1	1	1	1	1
729	860	2236	1900	908	1576	1	1	1	1	1	1
788	790	1996	1314	1294	1699	0	1	1	1	0	0
1075	883	1805	826	2444	1629	1	1	1	1	1	1
728	812	2054	886	1266	2175	1	1	1	1	1	1
797	747	1706	2710	894	2144	1	1	1	0	1	1
931	825	1605	1671	1129	2270	1	1	1	1	1	1
2030	676	2653	1303	1102	2390	1	1	1	1	1	1
837	752	2513	878	950	1673	1	1	1	1	1	1
809	686	1968	1489	1142	1828	1	1	1	0	1	0
1190	1242	1945	2093	1119	1303	1	1	1	1	1	1
938	971	1713	1315	869	2001	1	0	1	1	1	1
967	875	1753	1417	1640	2224	1	1	1	1	1	1
912	1026	2143	1015	1199	1415	1	1	1	1	1	1
793	872	2105	1190	1110	1777	1	1	1	1	1	1
855	1017	2017	1861	1696	1949	1	1	1	1	1	1
1376	923	2715	975	912	1746	1	1	1	1	0	1
986	988	1903	1636	1236	2311	1	1	1	1	0	1
930	889	2014	1117	1247	4347	1	1	1	1	1	1
936	843	2964	1418	2369	1468	1	1	1	1	1	1
875	1098	2560	1499	978	2067	1	1	1	1	1	1
1443	1125	2113	2081	1489	2179	1	1	1	1	1	1
1422	908	1723	1475	1524	2346	1	1	0	0	1	0
648	685	1679	2145	1635	2060	1	0	1	0	1	1
1417	952	1633	1609	1507	1569	1	1	1	1	1	1
1386	950	1761	1484	1603	1441	1	1	1	1	1	1
1227	1248	2745	2207	1615	3118	1	1	1	1	1	1
891	1602	1947	1534	1826	3140	1	1	1	1	1	1
978	1206	1809	1739	2049	1847	1	1	0	0	1	1
730	1154	2224	2919	1416	1964	1	1	1	0	1	1
1262	1012	3009	1565	2373	2141	1	1	1	1	1	1
801	1285	2016	3902	2230	2504	1	1	0	1	1	1
1899	1487	2285	2858	1656	2764	1	1	0	0	1	1
1155	975	1892	2006	3320	1812	1	1	0	1	1	1
799	1458	2107	1737	1448	1698	1	1	0	1	1	1
1067	1607	2810	1597	1901	2568	1	1	1	1	1	1
1259	1582	1682	1859	2389	2033	1	1	1	0	1	1
785	1503	2245	2681	3241	2006	1	1	1	0	1	1
802	1480	2468	1748	2087	2213	1	1	1	1	1	0
2074	1345	2851	2583	1533	2373	1	1	1	1	1	1
1303	1419	2906	2010	2813	3116	1	0	1	1	0	1
1336	1435	1648	2210	3932	2210	1	1	0	1	1	1
937	671	1811	2974	2942	3901	1	1	1	1	1	1
728	992	1745	1496	2363	3439	1	1	0	1	1	0
1479	1181	2540	2536	2505	4171	1	1	0	1	1	1
894	745	1848	2816	3299	4612	1	1	1	1	1	1
1565	977	1990	3253	2676	2728	1	0	0	0	1	1
1349	848	2506	2085	2470	3110	1	1	1	1	1	1
924	1571	2410	1934	1975	2110	1	1	1	1	1	0
1683	1544	2397	2597	2307	3472	1	1	1	1	1	1
1314	991	1988	2354	2220	2429	1	1	1	1	1	1
1082	1567	2426	1709	2803	1884	1	1	1	1	1	1
1409	1580	2521	2250	2236	3560	1	1	1	1	1	0
905	1733	2655	2296	1611	2340	1	1	1	1	1	1
1003	968	2824	2399	2714	2387	1	1	1	1	1	1
1803	1134	2745	1870	2357	3582	0	1	1	1	1	1
932	950	2989	1943	2129	2063	1	1	1	1	1	1
867	1020	2199	2346	1743	1674	1	1	1	1	1	1
947	2288	2500	3144	2019	2602	1	1	1	1	1	0
1091	1213	1803	2528	1820	2432	1	1	1	1	1	1
625	1538	2308	1839	1974	1656	1	1	1	1	1	1
1366	830	1885	1590	1036	2004	1	1	0	1	0	1
826	851	1715	1582	2148	1680	1	1	1	1	1	1
710	654	1807	1634	1504	2042	1	1	1	1	1	1
686	744	1703	1504	2681	1765	1	1	1	1	0	1
624	767	2754	1634	1493	1544	1	1	0	0	1	1
954	984	2027	1363	1922	1405	1	1	1	1	1	1
815	618	1889	2099	1863	1777	1	1	1	1	0	1
841	1079	2043	3192	1475	1353	1	1	1	1	1	0
1411	983	2996	1324	1668	1726	1	1	0	0	1	1
899	941	2200	1410	1780	1700	1	1	0	1	1	1
1094	964	1825	1842	1561	1370	1	1	1	1	0	0
938	822	3172	1554	1388	2101	1	1	1	1	1	1
1497	1263	2566	1501	1734	2356	1	1	0	1	0	0
719	901	2087	1396	1731	2579	1	1	1	0	1	1
907	852	2123	1859	1809	1915	1	1	1	1	1	1
1145	1099	2307	1964	1832	1667	0	1	0	1	0	1
969	1364	1853	1356	1749	1835	1	1	0	0	0	1
837	739	2031	2021	1723	1821	1	1	1	1	1	1
950	657	2207	1641	1439	2008	1	1	1	1	1	1
1040	680	1906	1815	1460	1425	0	1	1	1	1	0
977	813	2199	2251	1701	1544	1	1	1	1	0	0
892	685	1893	2033	1560	1936	1	1	1	1	1	1
947	790	1884	1714	1716	2027	1	1	1	1	1	1
751	850	1978	2528	1649	2141	1	1	1	1	1	1
826	763	1908	1562	2266	1971	1	1	0	1	1	0
733	904	1818	2003	2122	2115	1	1	1	1	1	1
933	999	1835	2547	1932	2003	1	1	1	1	1	1
871	1045	2048	1893	2511	1925	1	1	1	1	0	0
1116	1014	1942	1923	1914	2134	1	1	0	1	1	1
710	1030	2937	2017	2231	2018	1	0	1	1	1	1
793	885	2532	2092	1823	2378	1	1	0	1	1	1
868	2409	1992	1897	2462	2237	1	1	1	1	1	1
637	769	2952	2032	1674	2083	1	1	1	0	0	1
1078	953	2126	1898	3155	2037	1	1	1	1	1	1
883	862	2048	2362	1713	1916	1	1	1	0	1	1
751	728	2290	1792	2005	1957	1	1	1	1	1	1
715	723	2551	1944	1510	2406	1	1	1	1	1	1
797	789	1757	1689	2430	1861	1	1	1	0	0	0
945	761	1854	2298	1582	2626	1	1	1	1	0	1
988	791	2025	2503	1442	1749	1	1	1	0	1	1
1049	906	2436	1298	1327	1655	1	1	0	1	1	1
993	2351	2410	1946	1424	1537	1	0	1	1	1	1
962	1211	2100	1750	1408	1796	1	1	1	1	1	1
884	912	2281	1510	1702	1452	1	1	1	0	1	0
1540	1310	1995	1523	2250	1923	1	1	1	1	1	1
729	1033	1853	1806	1732	1579	1	1	1	1	1	1
820	2018	1860	1468	1717	1777	1	1	1	0	1	1
904	1117	2560	2093	2227	1801	1	1	1	1	1	1
889	1446	2009	1715	2019	1550	1	1	1	1	1	0
823	990	2225	1543	1759	1646	1	1	1	1	1	1
1204	860	2032	1888	1774	2177	1	1	1	1	1	1
906	994	2056	1574	1690	2228	1	1	1	1	1	0
1271	1367	2824	1689	1606	1769	1	1	1	1	1	1
916	1039	2772	1751	1782	2235	1	1	1	1	1	1
1279	924	2390	2084	2023	1726	1	1	1	1	1	1
1005	819	2907	1923	1933	2058	1	1	1	1	0	1
1205	1312	2431	2059	2415	2192	1	1	1	1	1	1
998	1118	1999	1742	1578	2006	1	1	1	1	1	0
2094	1255	2048	1761	1764	1485	1	1	1	1	0	1
1235	1761	1935	1597	1552	1968	1	1	1	1	1	0
876	821	2241	2075	1434	1658	1	1	1	0	1	1
855	1049	2027	1327	1331	1859	1	1	1	1	1	0
723	595	1880	2081	1305	1663	1	1	1	1	1	1
1005	1170	2268	1913	1464	1681	1	1	1	1	1	1
938	761	2185	1738	2207	1661	1	1	1	1	1	1
559	622	2068	1517	1826	1920	1	1	1	0	1	1
694	972	2118	1858	1935	1624	1	1	1	1	1	1
829	797	2045	1653	1697	1637	1	1	1	1	1	1
1094	776	2510	1532	1861	1676	1	1	1	0	1	1
691	913	2223	1497	2067	2036	1	1	1	1	1	1
676	833	1887	1346	1592	2421	1	1	1	1	1	1
828	589	2325	1856	1645	1903	1	1	1	0	1	1
1075	888	2578	1777	2723	1523	1	1	1	1	1	1
831	607	1989	1791	2487	1742	1	1	1	1	1	1
652	760	2154	1893	1414	2172	1	1	1	0	1	1
720	1104	2895	1833	1425	1906	0	0	1	0	1	1
768	1331	2944	1095	1403	2369	1	1	1	1	0	1
855	996	2783	1656	2334	2300	1	1	0	1	1	0
910	802	1810	1378	1562	1471	1	1	1	1	1	1
665	1058	2642	2063	1741	1527	1	1	1	1	1	1
