# Supplementary material for: An extended research of crossmodal correspondence between color and sound in psychology and cognitive ergonomics
Source: PeerJ. 2018 Mar 1;6:e4443. doi: 10.7717/peerj.4443 (PMC5835347; doi:10.7717/peerj.4443)
Supplement: Datset S1 [file peerj-06-4443-s001.xlsx]

## Sheet: Sheet1
Subjects	Gender	Age	Properties	Levels	Hue	H-RT	BRI./SAT.	B-RT
1	Male	24	Discontinuity	1	#FFFFFF00	2143.12	#FFFFFF7F	1594.76
2	Male	20	Discontinuity	1	#FFFFA500	11864.9	#FF664200	3621.07
3	Male	23	Discontinuity	1	#FFFF0000	4590.1	#FF660000	1944.07
4	Male	37	Discontinuity	1	#FF00FF00	3521.1	#FF00CC00	2664.07
5	Male	22	Discontinuity	1	#FF00FF00	3260.1	#FF009900	143.008
6	Female	25	Discontinuity	1	#FFFF0000	2145.29	#FF660000	888.051
7	Female	22	Discontinuity	1	#FF0000FF	10419.1	#FF0000FF	4462.53
8	Male	22	Discontinuity	1	#FFFFA500	3819.39	#FF996300	2200.13
9	Male	21	Discontinuity	1	#FF0000FF	1577.26	#FF000099	1201.07
10	Male	21	Discontinuity	1	#FF00FF00	1923.96	#FF0000CC	2195.87
11	Female	23	Discontinuity	1	#FFFFA500	7793.12	#FF996300	1656.06
12	Female	34	Discontinuity	1	#FF00FFFF	2153.53	#FF00FFFF	877.691
13	Female	24	Discontinuity	1	#FFFFFF00	1780.33	#FFCCCC00	3256.47
14	Female	24	Discontinuity	1	#FF00FF00	1522.26	#FF00CC00	3513.2
15	Female	23	Discontinuity	1	#FF00FF00	1972.23	#FF009900	968.051
16	Male	27	Discontinuity	1	#FF00FFFF	3583.38	#FF009999	2817.16
17	Male	23	Discontinuity	1	#FFFFFF00	1524.98	#FFFFFFB3	1366.93
18	Female	51	Discontinuity	1	#FFFF00FF	10611.9	#FFCC00CC	4087.86
19	Female	39	Discontinuity	1	#FFFF0000	2943.65	#FF990000	5368.45
20	Female	38	Discontinuity	1	#FF0000FF	3613.84	#FF0000FF	3704.07
21	Male	22	Discontinuity	1	#FF0000FF	2774.46	#FF0000FF	1232.36
22	Female	42	Discontinuity	1	#FF00FFFF	3247.36	#FF009999	1809.1
23	Female	23	Discontinuity	1	#FFFFFF00	2451.85	#FFFFFFB3	696.04
24	Female	42	Discontinuity	1	#FF00FF00	1396.17	#FF00CC00	2440.59
25	Female	23	Discontinuity	1	#FFFF00FF	9896.02	#FFCC00CC	9086.08
26	Female	52	Discontinuity	1	#FF00FFFF	2194.1	#FF00CCCC	1732.07
27	Female	50	Discontinuity	1	#FF00FF00	9207.12	#FF000099	2656.07
28	Male	25	Discontinuity	1	#FF0000FF	3742.28	#FF0000FF	2607.82
29	Male	25	Discontinuity	1	#FFFFFF00	4529.1	#FFFFFF00	2379.07
30	Female	45	Discontinuity	1	#FF00FFFF	7442.12	#FF7FFFFF	1549.07
31	Male	25	Discontinuity	1	#FFFFA500	5787.5	#FFFFD37F	1327.08
32	Male	23	Discontinuity	1	#FF0000FF	5149.08	#FF0000FF	3952.07
33	Male	26	Discontinuity	1	#FFFFFF00	5268.11	#FFCCCC00	15222.1
34	Female	34	Discontinuity	1	#FFFF0000	2508.83	#FF990000	704.002
35	Female	23	Discontinuity	1	#FFFFA500	6525.15	#FFFFE5B3	3432.12
36	Male	24	Discontinuity	1	#FF0000FF	5517.18	#FF0000FF	4169.16
37	Female	24	Discontinuity	1	#FF0000FF	1502.07	#FF000099	812.047
38	Male	23	Discontinuity	1	#FF00FFFF	2473.77	#FF009999	1240.34
39	Male	22	Discontinuity	1	#FFFF0000	5629.49	#FFFF0000	2512.14
40	Female	22	Discontinuity	1	#FFFFFF00	7506.62	#FFFFFF00	4301.25
41	Female	24	Discontinuity	1	#FFFF00FF	1891.22	#FFFF00FF	6624.45
42	Male	46	Discontinuity	1	#FFFF00FF	4611.44	#FFCC00CC	2777.49
43	Male	38	Discontinuity	1	#FF00FFFF	1463.34	#FFE6FFFF	1257.59
44	Female	24	Discontinuity	1	#FF00FFFF	8128.62	#FF7FFFFF	16616
45	Male	22	Discontinuity	1	#FFFF00FF	1331.72	#FFFF7FFF	770.516
46	Female	23	Discontinuity	1	#FF00FF00	2818.33	#FF009900	1734.1
47	Male	24	Discontinuity	1	#FF0000FF	2148.18	#FF807FFF	951.054
48	Male	25	Discontinuity	1	#FF00FF00	9801.12	#FF006600	1064.74
49	Female	24	Discontinuity	1	#FF00FFFF	11091.6	#FF00CCCC	2168.01
50	Female	23	Discontinuity	1	#FFFF0000	2979.9	#FFFF0000	1504.8
51	Male	24	Discontinuity	1	#FFFFFF00	4890.2	#FFFFFF00	2351.2
52	Male	53	Discontinuity	1	#FFFF0000	4086.16	#FFFF0000	1223.93
1	Male	24	Discontinuity	0.7	#FFFF0000	2815.64	#FF660000	1626.3
2	Male	20	Discontinuity	0.7	#FF00FFFF	2853.91	#FF00FFFF	1668.07
3	Male	23	Discontinuity	0.7	#FFFF00FF	6134.1	#FF990099	2144.07
4	Male	37	Discontinuity	0.7	#FFFFFF00	4628.07	#FFCCCC00	2364.07
5	Male	22	Discontinuity	0.7	#FFFFFF00	4969.1	#FFFFFF7F	1918.07
6	Female	25	Discontinuity	0.7	#FFFF00FF	7447.62	#FF990099	2584.15
7	Female	22	Discontinuity	0.7	#FF00FF00	2703.09	#FF00FF00	1151.87
8	Male	22	Discontinuity	0.7	#FFFF0000	3171.35	#FF990000	2480.14
9	Male	21	Discontinuity	0.7	#FF0000FF	3118.18	#FF807FFF	774.044
10	Male	21	Discontinuity	0.7	#FF0000FF	2702.52	#FF0000CC	3880.57
11	Female	23	Discontinuity	0.7	#FF0000FF	3556.54	#FF0000FF	2281.01
12	Female	34	Discontinuity	0.7	#FF0000FF	1386.43	#FF0000FF	903.628
13	Female	24	Discontinuity	0.7	#FF0000FF	4940.17	#FF0000FF	1303.93
14	Female	24	Discontinuity	0.7	#FF00FFFF	2778.33	#FF00FFFF	1643.09
15	Female	23	Discontinuity	0.7	#FFFFA500	8550.63	#FFCC8500	3186.18
16	Male	27	Discontinuity	0.7	#FFFFA500	2186.3	#FFFFA500	4023.23
17	Male	23	Discontinuity	0.7	#FF0000FF	1986.99	#FF0000FF	5582.97
18	Female	51	Discontinuity	0.7	#FFFF00FF	6931.27	#FFCC00CC	8717.18
19	Female	39	Discontinuity	0.7	#FF00FFFF	4756.3	#FF7FFFFF	1395.73
20	Female	38	Discontinuity	0.7	#FF00FF00	2042.26	#FF00CC00	640.239
21	Male	22	Discontinuity	0.7	#FFFF0000	2306.27	#FFFF0000	591.889
22	Female	42	Discontinuity	0.7	#FFFFFF00	6687.55	#FFFFFFB3	2280.13
23	Female	23	Discontinuity	0.7	#FF0000FF	10244.8	#FF000066	2056.12
24	Female	42	Discontinuity	0.7	#FF00FFFF	2960.64	#FFB3FFFF	3197.69
25	Female	23	Discontinuity	0.7	#FFFFA500	9218.12	#FF996300	5652.07
26	Female	52	Discontinuity	0.7	#FF00FF00	5938.1	#FF00FF00	5157.07
27	Female	50	Discontinuity	0.7	#FFFF00FF	10936.1	#FFFF00FF	6706.07
28	Male	25	Discontinuity	0.7	#FFFFA500	2237.93	#FF996300	3544
29	Male	25	Discontinuity	0.7	#FFFFA500	10526.1	#FFCC8500	12873.1
30	Female	45	Discontinuity	0.7	#FF0000FF	5738.1	#FF000099	2694.07
31	Male	25	Discontinuity	0.7	#FFFF0000	2577.32	#FFFF0000	2314.13
32	Male	23	Discontinuity	0.7	#FFFFFF00	5934.11	#FFFFFF00	8288.08
33	Male	26	Discontinuity	0.7	#FFFF0000	4751.11	#FFFFB3B3	2921.07
34	Female	34	Discontinuity	0.7	#FFFFA500	3834.13	#FFFFD37F	888.232
35	Female	23	Discontinuity	0.7	#FFFFFF00	8215.72	#FFFFFFE6	3241.34
36	Male	24	Discontinuity	0.7	#FF0000FF	2181.96	#FF0000CC	10096
37	Female	24	Discontinuity	0.7	#FFFF00FF	8456.11	#FFFFB3FF	1741.06
38	Male	23	Discontinuity	0.7	#FF00FF00	1841.12	#FF00FF00	727.436
39	Male	22	Discontinuity	0.7	#FF0000FF	4031.4	#FF000066	4440.25
40	Female	22	Discontinuity	0.7	#FFFFFF00	6577.55	#FFFFFF7F	3566.2
41	Female	24	Discontinuity	0.7	#FF00FFFF	3451.75	#FF00FFFF	5311.73
42	Male	46	Discontinuity	0.7	#FFFF00FF	9956.94	#FFFF00FF	2840.87
43	Male	38	Discontinuity	0.7	#FF0000FF	1674.72	#FF0000CC	878.222
44	Female	24	Discontinuity	0.7	#FF00FF00	4681.44	#FF80FF7F	2519.14
45	Male	22	Discontinuity	0.7	#FF0000FF	4988.07	#FF000099	1684.14
46	Female	23	Discontinuity	0.7	#FFFFA500	9296.05	#FFFFA500	3521.2
47	Male	24	Discontinuity	0.7	#FFFF00FF	1199.22	#FFFF00FF	963.055
48	Male	25	Discontinuity	0.7	#FF0000FF	2891.18	#FF0000FF	1054.75
49	Female	24	Discontinuity	0.7	#FF00FF00	3833.5	#FF00FF00	5327.84
50	Female	23	Discontinuity	0.7	#FFFFFF00	8246.11	#FFFFFF7F	631.029
51	Male	24	Discontinuity	0.7	#FFFFA500	8412.88	#FFFFA500	4436.73
52	Male	53	Discontinuity	0.7	#FFFFFF00	2868.46	#FFFFFF7F	3447.99
1	Male	24	Discontinuity	0.4	#FF00FFFF	2479.88	#FF006666	1074.38
2	Male	20	Discontinuity	0.4	#FFFF00FF	2481.9	#FF990099	1428.07
3	Male	23	Discontinuity	0.4	#FFFF00FF	7054.12	#FF660066	2029.06
4	Male	37	Discontinuity	0.4	#FFFF00FF	11282.1	#FFFF7FFF	6181.07
5	Male	22	Discontinuity	0.4	#FF00FF00	1149.1	#FF00CC00	2232.07
6	Female	25	Discontinuity	0.4	#FF0000FF	6314.53	#FF000099	1472.08
7	Female	22	Discontinuity	0.4	#FFFF0000	9051.22	#FFFF0000	4305.9
8	Male	22	Discontinuity	0.4	#FFFFFF00	8327.21	#FFCCCC00	6440.37
9	Male	21	Discontinuity	0.4	#FF0000FF	2670.32	#FF000066	2044.12
10	Male	21	Discontinuity	0.4	#FFFFA500	2517.79	#FFCC8500	895.635
11	Female	23	Discontinuity	0.4	#FFFFA500	3429.76	#FFCC8500	6361.29
12	Female	34	Discontinuity	0.4	#FFFF00FF	4849.33	#FFFF00FF	1523.71
13	Female	24	Discontinuity	0.4	#FF00FF00	2796.33	#FF00FF00	1368.11
14	Female	24	Discontinuity	0.4	#FF0000FF	4558.43	#FF0000CC	2632.15
15	Female	23	Discontinuity	0.4	#FFFFA500	4274.43	#FF996300	1192.06
16	Male	27	Discontinuity	0.4	#FFFF0000	4974.46	#FF990000	2600.15
17	Male	23	Discontinuity	0.4	#FF00FF00	5076.85	#FF00FF00	1167.19
18	Female	51	Discontinuity	0.4	#FF00FF00	10007.6	#FF00FF00	5522.95
19	Female	39	Discontinuity	0.4	#FF00FF00	1288.91	#FF00FF00	4307.18
20	Female	38	Discontinuity	0.4	#FF00FFFF	1342.31	#FF00FFFF	991.703
21	Male	22	Discontinuity	0.4	#FF0000FF	2449.65	#FF0000CC	847.311
22	Female	42	Discontinuity	0.4	#FF00FF00	1909.22	#FF00FF00	2820.16
23	Female	23	Discontinuity	0.4	#FFFF00FF	3705.93	#FFCC8500	1704.1
24	Female	42	Discontinuity	0.4	#FF00FFFF	6059.96	#FF7FFFFF	1437.14
25	Female	23	Discontinuity	0.4	#FF0000FF	3254.1	#FF000099	2414.07
26	Female	52	Discontinuity	0.4	#FF00FFFF	3826.82	#FFB3FFFF	10912.1
27	Female	50	Discontinuity	0.4	#FFFFFF00	8591.21	#FFFFFF00	4337.07
28	Male	25	Discontinuity	0.4	#FFFF0000	1765.96	#FFCC0000	7632.14
29	Male	25	Discontinuity	0.4	#FFFFA500	5004.07	#FFFFA500	2195.07
30	Female	45	Discontinuity	0.4	#FF00FF00		#FF00FF00	4583.07
31	Male	25	Discontinuity	0.4	#FF0000FF	6702.56	#FF0000FF	7954.45
32	Male	23	Discontinuity	0.4	#FF00FF00	8975.11	#FF00FF00	5247.07
33	Male	26	Discontinuity	0.4	#FFFF0000	7363.13	#FFFFE6E6	143.008
34	Female	34	Discontinuity	0.4	#FFFF00FF	2155.77	#FFFF7FFF	946.289
35	Female	23	Discontinuity	0.4	#FF0000FF	1965.28	#FF000099	5888.35
36	Male	24	Discontinuity	0.4	#FFFF0000	1101.32	#FF990000	2407.71
37	Female	24	Discontinuity	0.4	#FF0000FF	7071.12	#FF000066	2677.07
38	Male	23	Discontinuity	0.4	#FFFF00FF	1671.79	#FF990099	1385.75
39	Male	22	Discontinuity	0.4	#FF00FFFF	1798.22	#FF006666	2120.12
40	Female	22	Discontinuity	0.4	#FFFF0000	7998.63	#FFCC0000	2486.14
41	Female	24	Discontinuity	0.4	#FFFFA500	5124.91	#FFFFA500	2119.97
42	Male	46	Discontinuity	0.4	#FFFF00FF	2395.37	#FFFF00FF	2256.25
43	Male	38	Discontinuity	0.4	#FF00FFFF	2307.51	#FF009999	745.426
44	Female	24	Discontinuity	0.4	#FFFFA500	5170.47	#FFFFA500	3287.19
45	Male	22	Discontinuity	0.4	#FF0000FF	2073.84	#FF0000CC	776.519
46	Female	23	Discontinuity	0.4	#FFFFA500	8039.61	#FFFFE5B3	2908.17
47	Male	24	Discontinuity	0.4	#FFFFA500	1403.25	#FFFFD37F	1175.07
48	Male	25	Discontinuity	0.4	#FF00FFFF		#FFE6FFFF	2120.49
49	Female	24	Discontinuity	0.4	#FFFFA500	2972.8	#FF664200	5111.97
50	Female	23	Discontinuity	0.4	#FFFFFF00	6892.08	#FFFFFF00	734.499
51	Male	24	Discontinuity	0.4	#FFFF00FF	1495.25	#FFFF7FFF	3994.38
52	Male	53	Discontinuity	0.4	#FFFFFF00	1029.76	#FFFFFF00	2527.43
1	Male	24	Discontinuity	0	#FF0000FF	3913.44	#FF0000CC	3738.25
2	Male	20	Discontinuity	0	#FFFF00FF	2165.93	#FF660066	1215.06
3	Male	23	Discontinuity	0	#FF00FF00	2245.11	#FF00FF00	2408.07
4	Male	37	Discontinuity	0	#FF0000FF	5301.08	#FF000099	1943.07
5	Male	22	Discontinuity	0	#FF0000FF	2249.12	#FFB3B3FF	1392.07
6	Female	25	Discontinuity	0	#FFFFA500	2785.33	#FF664200	1568.09
7	Female	22	Discontinuity	0	#FF00FFFF	8698.69	#FF00CCCC	1043.45
8	Male	22	Discontinuity	0	#FF00FFFF	5443.48	#FFB3FFFF	2664.15
9	Male	21	Discontinuity	0	#FF0000FF	1706.27	#FFB3B3FF	1855.11
10	Male	21	Discontinuity	0	#FFFF0000	8916.32	#FFFF7F7F	1180.27
11	Female	23	Discontinuity	0	#FF00FFFF	10556.5	#FF7FFFFF	2844.24
12	Female	34	Discontinuity	0	#FF00FF00	5377.25	#FF00CC00	1700.28
13	Female	24	Discontinuity	0	#FF00FF00	5684.17	#FF00CC00	3407.73
14	Female	24	Discontinuity	0	#FF0000FF	4074.41	#FF0000CC	1271.07
15	Female	23	Discontinuity	0	#FFFF0000	5539.49	#FFCC0000	1857.1
16	Male	27	Discontinuity	0	#FFFF0000	10171.9	#FFCC0000	1841.11
17	Male	23	Discontinuity	0	#FFFFA500	4515.68	#FFCC8500	3744.04
18	Female	51	Discontinuity	0	#FFFF00FF	9916.21	#FFCC00CC	4610.35
19	Female	39	Discontinuity	0	#FFFFFF00	4746.72	#FFFFFF7F	1947.43
20	Female	38	Discontinuity	0	#FF00FFFF	2006.34	#FF009999	559.483
21	Male	22	Discontinuity	0	#FF0000FF	3474.62	#FF000066	1592.53
22	Female	42	Discontinuity	0	#FF00FF00	2157.3	#FF00CC00	2892.16
23	Female	23	Discontinuity	0	#FF0000FF	2342.85	#FF000066	1238.07
24	Female	42	Discontinuity	0	#FF00FF00	2374.88	#FF80FF7F	1550.42
25	Female	23	Discontinuity	0	#FFFF00FF	10298.1	#FFCC00CC	8382.08
26	Female	52	Discontinuity	0	#FF00FF00	9958.11	#FF80FF7F	5752.07
27	Female	50	Discontinuity	0	#FF0000FF	10312.9	#FF000099	18759.1
28	Male	25	Discontinuity	0	#FFFFA500	2205.54	#FFCC8500	1415.82
29	Male	25	Discontinuity	0	#FFFFA500	5085.1	#FFCC8500	5340.07
30	Female	45	Discontinuity	0	#FF0000FF	9365.11	#FF0000CC	4386.07
31	Male	25	Discontinuity	0	#FF00FFFF	10861.9	#FF00CCCC	1668.1
32	Male	23	Discontinuity	0	#FFFF0000	4111.07	#FFCC0000	3572.07
33	Male	26	Discontinuity	0	#FF00FF00	7772.12	#FF80FF7F	1353.07
34	Female	34	Discontinuity	0	#FF00FFFF	1019.47	#FF00FFFF	1072.32
35	Female	23	Discontinuity	0	#FFFFFF00	4766.01	#FFFFFFB3	2057.53
36	Male	24	Discontinuity	0	#FFFF00FF	1693.98	#FFCC00CC	1119.57
37	Female	24	Discontinuity	0	#FFFFFF00	2704.1	#FFFFFF7F	3678.14
38	Male	23	Discontinuity	0	#FFFF00FF	2207.43	#FFFF7FFF	1047.48
39	Male	22	Discontinuity	0	#FF0000FF	8708.67	#FF000099	10144.6
40	Female	22	Discontinuity	0	#FFFF0000	9226.72	#FFFF0000	929.053
41	Female	24	Discontinuity	0	#FF0000FF	5596.98	#FF000066	5064.55
42	Male	46	Discontinuity	0	#FFFFA500	3908.94	#FFCC8500	1433.6
43	Male	38	Discontinuity	0	#FFFF00FF	10561	#FFFF7FFF	1413.06
44	Female	24	Discontinuity	0	#FFFFA500	4249.41	#FFFFA500	3160.18
45	Male	22	Discontinuity	0	#FF00FF00	2696.27	#FF00FF00	3373.83
46	Female	23	Discontinuity	0	#FFFF00FF	5841.51	#FFCC00CC	1735.1
47	Male	24	Discontinuity	0	#FFFF0000	1683.21	#FFCC0000	1496.09
48	Male	25	Discontinuity	0	#FF0000FF	8394.02	#FF000099	2129.5
49	Female	24	Discontinuity	0	#FFFFA500	2973	#FFCC8500	4643.82
50	Female	23	Discontinuity	0	#FFFF00FF	2335.18	#FFCC00CC	1037.47
51	Male	24	Discontinuity	0	#FFFFFF00	2449.62	#FFFFFF7F	3015.9
52	Male	53	Discontinuity	0	#FFFF00FF	1158.81	#FFCC00CC	3918.63
1	Male	24	Sharpness	level4	#FFFF00FF	2311.86	#FFCC00CC	3159.97
2	Male	20	Sharpness	level4	#FFFF0000	2971.91	#FFFF7F7F	1164.07
3	Male	23	Sharpness	level4	#FFFFFF00	11024.1	#FFFFFF00	2752.07
4	Male	37	Sharpness	level4	#FF0000FF	1254.02	#FF0000FF	4392.07
5	Male	22	Sharpness	level4	#FFFF0000	3535.1	#FFFF7F7F	2195.07
6	Female	25	Sharpness	level4	#FF00FF00	1153.24	#FF009900	928.053
7	Female	22	Sharpness	level4	#FFFFA500	11309.8	#FFFFA500	4368.11
8	Male	22	Sharpness	level4	#FFFF0000	3163.35	#FFCC0000	2752.16
9	Male	21	Sharpness	level4	#FF0000FF	2161.3	#FF0000FF	1488.09
10	Male	21	Sharpness	level4	#FF0000FF	3814.13	#FF0000FF	2482.81
11	Female	23	Sharpness	level4	#FFFFFF00	3628.9	#FFFFFF7F	2400.51
12	Female	34	Sharpness	level4	#FFFFA500	3065.22	#FFCC8500	1365.47
13	Female	24	Sharpness	level4	#FF00FF00	4332.66	#FF00CC00	4127.57
14	Female	24	Sharpness	level4	#FF00FFFF	2554.32	#FF006666	2616.15
15	Female	23	Sharpness	level4	#FFFF00FF	5027.46	#FFFF00FF	1969.12
16	Male	27	Sharpness	level4	#FF00FF00	8457.32	#FF00FF00	4449.26
17	Male	23	Sharpness	level4	#FFFFFF00	2460.03	#FFFFFF7F	2272.01
18	Female	51	Sharpness	level4	#FF00FFFF	5569.28	#FF00CCCC	3129.68
19	Female	39	Sharpness	level4	#FF00FFFF	4943.8	#FF7FFFFF	2258.24
20	Female	38	Sharpness	level4	#FF0000FF	2781.24	#FF0000CC	736.649
21	Male	22	Sharpness	level4	#FFFF00FF	3387.34	#FFCC00CC	695.931
22	Female	42	Sharpness	level4	#FF00FFFF	1807.28	#FFB3FFFF	1101.06
23	Female	23	Sharpness	level4	#FFFFA500	2923.94	#FFFFA500	672.038
24	Female	42	Sharpness	level4	#FFFFA500	3223.32	#FFFFA500	3427.07
25	Female	23	Sharpness	level4	#FFFF00FF	6500.08	#FFFF7FFF	7803.07
26	Female	52	Sharpness	level4	#FF0000FF	10606.1	#FF0000FF	3648.07
27	Female	50	Sharpness	level4	#FFFF00FF	5683.1	#FFFF00FF	7423.07
28	Male	25	Sharpness	level4	#FF00FFFF	2509.75	#FF7FFFFF	6159.65
29	Male	25	Sharpness	level4	#FFFF0000	6686.87	#FFFF0000	6579.07
30	Female	45	Sharpness	level4	#FFFF0000	4848.11	#FFFF0000	2988.07
31	Male	25	Sharpness	level4	#FFFFFF00	3325.36	#FFFFFF00	2052.12
32	Male	23	Sharpness	level4	#FFFFFF00	4916.1	#FFFFFFB3	3203.07
33	Male	26	Sharpness	level4	#FFFFFF00	3766.1	#FFFFFF7F	145.008
34	Female	34	Sharpness	level4	#FFFF0000	5700.19	#FFCC0000	2047.82
35	Female	23	Sharpness	level4	#FF0000FF		#FF000099	4375.34
36	Male	24	Sharpness	level4	#FFFFFF00	1726.82	#FFFFFF00	2542.65
37	Female	24	Sharpness	level4	#FFFF0000	1576.1	#FFFF0000	1173.06
38	Male	23	Sharpness	level4	#FFFFA500	1662.89	#FFFFA500	821.4
39	Male	22	Sharpness	level4	#FFFF0000	7907.62	#FFFF7F7F	1736.1
40	Female	22	Sharpness	level4	#FF00FFFF	1483.26	#FF7FFFFF	4576.26
41	Female	24	Sharpness	level4	#FFFFFF00	5038.35	#FFFFFF7F	6600.77
42	Male	46	Sharpness	level4	#FF00FF00	7626.43	#FF80FF7F	3841.16
43	Male	38	Sharpness	level4	#FF00FF00	5176.32	#FF00CC00	1351.69
44	Female	24	Sharpness	level4	#FFFFFF00	4449.43	#FFFFFF00	4528.26
45	Male	22	Sharpness	level4	#FFFFA500	4828.89	#FFFFE5B3	1527.58
46	Female	23	Sharpness	level4	#FFFF00FF	2879.34	#FFFF7FFF	2087.12
47	Male	24	Sharpness	level4	#FFFF0000	1707.27	#FFFF0000	1124.06
48	Male	25	Sharpness	level4	#FFFF0000	1716.62	#FFCC0000	1520.08
49	Female	24	Sharpness	level4	#FF00FF00	2050.6	#FF80FF7F	3720.76
50	Female	23	Sharpness	level4	#FFFFA500	1732.85	#FFFFA500	687.655
51	Male	24	Sharpness	level4	#FF0000FF	9749.21	#FF0000FF	2559.91
52	Male	53	Sharpness	level4	#FFFFFF00	3445.2	#FFFFFF7F	2320.53
1	Male	24	Sharpness	level3	#FFFFA500	6367.66	#FFFFA500	3908.07
2	Male	20	Sharpness	level3	#FFFF0000	1877.9	#FFFF0000	1116.06
3	Male	23	Sharpness	level3	#FF0000FF	6333.1	#FF0000CC	2184.07
4	Male	37	Sharpness	level3	#FFFF0000	7946.02	#FFFF7F7F	1032.06
5	Male	22	Sharpness	level3	#FFFFFF00	1502.1	#FFFFFF00	2280.07
6	Female	25	Sharpness	level3	#FF00FF00	1705.27	#FF80FF7F	792.045
7	Female	22	Sharpness	level3	#FF0000FF	2876.12	#FF0000CC	1899.61
8	Male	22	Sharpness	level3	#FFFFA500	5707.5	#FF664200	6352.36
9	Male	21	Sharpness	level3	#FFFFFF00	2032.29	#FFFFFF7F	1875.11
10	Male	21	Sharpness	level3	#FFFFA500	4301.22	#FFCC8500	4332.99
11	Female	23	Sharpness	level3	#FF00FFFF	8349.91	#FFB3FFFF	4062
12	Female	34	Sharpness	level3	#FFFF0000	2401.48	#FFFF0000	1710.31
13	Female	24	Sharpness	level3	#FFFFA500	5924.88	#FFFFA500	6511.69
14	Female	24	Sharpness	level3	#FFFF00FF	3650.38	#FFFF7FFF	1784.1
15	Female	23	Sharpness	level3	#FFFF00FF	3339.36	#FFFF00FF	1208.07
16	Male	27	Sharpness	level3	#FF00FF00	8809.62	#FF00CC00	2896.17
17	Male	23	Sharpness	level3	#FFFF00FF	9390.53	#FFFF7FFF	1536.02
18	Female	51	Sharpness	level3	#FFFF0000	6951.57	#FF990000	1537.75
19	Female	39	Sharpness	level3	#FF00FF00	10362.8	#FFB3FFB3	4207.36
20	Female	38	Sharpness	level3	#FFFFA500	4142.96	#FFFFE5B3	4159.86
21	Male	22	Sharpness	level3	#FFFFA500	1645.97	#FFFFA500	1383.85
22	Female	42	Sharpness	level3	#FFFFA500	2546.32	#FFFFE5B3	1724.1
23	Female	23	Sharpness	level3	#FFFF0000	2121.84	#FFFF0000	1999.11
24	Female	42	Sharpness	level3	#FF0000FF	2968.27	#FFB3B3FF	918.126
25	Female	23	Sharpness	level3	#FF00FF00	7959.12	#FFB3FFB3	252.014
26	Female	52	Sharpness	level3	#FF00FFFF	1755.07	#FF00FFFF	145.008
27	Female	50	Sharpness	level3	#FF0000FF	5882.1	#FF0000FF	5913.07
28	Male	25	Sharpness	level3	#FFFFFF00	6605.46	#FFCCCC00	5032
29	Male	25	Sharpness	level3	#FF00FF00	6443.1	#FF00CC00	2669.07
30	Female	45	Sharpness	level3	#FF0000FF	9873.12	#FF000099	7182.07
31	Male	25	Sharpness	level3	#FFFFFF00	7748.61	#FFFFFF00	2747.16
32	Male	23	Sharpness	level3	#FFFF00FF	6752.11	#FFCC00CC	5658.07
33	Male	26	Sharpness	level3	#FFFF0000	4688.1	#FFFF0000	2462.07
34	Female	34	Sharpness	level3	#FFFF0000	5535.11	#FFFF0000	1663.5
35	Female	23	Sharpness	level3	#FF00FFFF	9246.21	#FF00CCCC	17270.2
36	Male	24	Sharpness	level3	#FFFFFF00	1813.15	#FFCCCC00	856.189
37	Female	24	Sharpness	level3	#FF00FF00	2790.07	#FFB3FFB3	2651.07
38	Male	23	Sharpness	level3	#FF0000FF	1445.52	#FF0000FF	702.861
39	Male	22	Sharpness	level3	#FFFF00FF	2748.21	#FFFF00FF	1616.09
40	Female	22	Sharpness	level3	#FFFF0000	9488.89	#FFFF7F7F	1058.06
41	Female	24	Sharpness	level3	#FF00FF00	2139.01	#FF80FF7F	2600.64
42	Male	46	Sharpness	level3	#FFFFFF00	7819.48	#FFCCCC00	6313.05
43	Male	38	Sharpness	level3	#FF0000FF	5252.67	#FF0000CC	1403.82
44	Female	24	Sharpness	level3	#FF00FFFF	2865.82	#FF00FFFF	5504.31
45	Male	22	Sharpness	level3	#FF00FFFF	9260.81	#FF7FFFFF	948.633
46	Female	23	Sharpness	level3	#FF0000FF	4066.4	#FF0000FF	1004.06
47	Male	24	Sharpness	level3	#FF00FFFF	2684.32	#FF7FFFFF	1589.09
48	Male	25	Sharpness	level3	#FFFFA500	3251.45	#FFFFE5B3	1286.9
49	Female	24	Sharpness	level3	#FF0000FF	2764.04	#FF0000CC	3000.95
50	Female	23	Sharpness	level3	#FF00FFFF	3621.32	#FF7FFFFF	1281.86
51	Male	24	Sharpness	level3	#FFFF0000	1019.75	#FFCC0000	3331.93
52	Male	53	Sharpness	level3	#FF00FF00	1676.4	#FF80FF7F	2840.6
1	Male	24	Sharpness	level2	#FF0000FF	2143.12	#FFB3B3FF	1594.76
2	Male	20	Sharpness	level2	#FFFFFF00	1864.9	#FFFFFF7F	3621.07
3	Male	23	Sharpness	level2	#FFFF00FF	4590.1	#FFCC00CC	1944.07
4	Male	37	Sharpness	level2	#FF0000FF	3521.1	#FFB3B3FF	2664.07
5	Male	22	Sharpness	level2	#FFFF0000	3260.1	#FFCC0000	143.008
6	Female	25	Sharpness	level2	#FFFF00FF	2145.29	#FFFF00FF	888.051
7	Female	22	Sharpness	level2	#FF0000FF	10419.1	#FF0000CC	4462.53
8	Male	22	Sharpness	level2	#FF00FF00	3819.33	#FF80FF7F	2200.13
9	Male	21	Sharpness	level2	#FF0000FF	1577.26	#FF000066	1201.07
10	Male	21	Sharpness	level2	#FF00FF00	1923.96	#FF00CC00	2195.87
11	Female	23	Sharpness	level2	#FFFFA500	7793.11	#FF664200	1656.06
12	Female	34	Sharpness	level2	#FFFF0000	3153.53	#FFFF0000	877.691
13	Female	24	Sharpness	level2	#FF00FF00	1780.31	#FF00FF00	3256.47
14	Female	24	Sharpness	level2	#FF00FFFF	1522.26	#FF7FFFFF	3513.2
15	Female	23	Sharpness	level2	#FF0000FF	972.23	#FFB3B3FF	968.051
16	Male	27	Sharpness	level2	#FF0000FF	3583.38	#FF00FFFF	2817.16
17	Male	23	Sharpness	level2	#FF00FF00	1524.98	#FF00CC00	1366.93
18	Female	51	Sharpness	level2	#FFFF0000	10611.9	#FFCC0000	4087.86
19	Female	39	Sharpness	level2	#FF00FFFF	2943.65	#FF00FFFF	5368.45
20	Female	38	Sharpness	level2	#FF00FFFF	3613.84	#FF00CCCC	3704.07
21	Male	22	Sharpness	level2	#FFFF00FF	2774.46	#FFCC00CC	1232.36
22	Female	42	Sharpness	level2	#FFFFFF00	3247.36	#FFFFFF00	1809.1
23	Female	23	Sharpness	level2	#FF00FFFF	1451.85	#FF00FFFF	696.04
24	Female	42	Sharpness	level2	#FFFF0000	1396.17	#FFFF0000	2440.59
25	Female	23	Sharpness	level2	#FF0000FF	10244.1	#FF0000FF	9086.08
26	Female	52	Sharpness	level2	#FFFFFF00	2194.1	#FFFFFF7F	1732.07
27	Female	50	Sharpness	level2	#FFFF00FF	9869.12	#FFFF00FF	2656.07
28	Male	25	Sharpness	level2	#FF00FF00	3742.28	#FF80FF7F	2607.82
29	Male	25	Sharpness	level2	#FFFFA500	4529.1	#FFFFA500	2379.07
30	Female	45	Sharpness	level2	#FFFFA500	7442.12	#FFFFD37F	1549.07
31	Male	25	Sharpness	level2	#FF00FFFF	5787.5	#FF00FFFF	1327.08
32	Male	23	Sharpness	level2	#FF0000FF	5149.08	#FF00FFFF	3952.07
33	Male	26	Sharpness	level2	#FFFFFF00	5268.11	#FF666600	15222.1
34	Female	34	Sharpness	level2	#FF00FFFF	2508.83	#FF7FFFFF	704.002
35	Female	23	Sharpness	level2	#FFFFFF00	6525.15	#FFFFFF00	3432.12
36	Male	24	Sharpness	level2	#FFFFFF00	5517.18	#FFFFFF7F	4169.16
37	Female	24	Sharpness	level2	#FFFFA500	1502.07	#FFFFE5B3	812.047
38	Male	23	Sharpness	level2	#FFFF00FF	2473.77	#FFCC00CC	1240.34
39	Male	22	Sharpness	level2	#FF00FFFF	5629.49	#FF7FFFFF	2512.14
40	Female	22	Sharpness	level2	#FF00FF00	7506.61	#FF00FF00	4301.25
41	Female	24	Sharpness	level2	#FFFF00FF	1891.22	#FFCC00CC	6624.45
42	Male	46	Sharpness	level2	#FF00FF00	4611.44	#FFB3FFB3	2777.49
43	Male	38	Sharpness	level2	#FF00FFFF	1463.34	#FF00FFFF	1257.59
44	Female	24	Sharpness	level2	#FFFFFF00	8128.64	#FFFFFF00	16616
45	Male	22	Sharpness	level2	#FFFFA500	1331.72	#FFFFA500	770.516
46	Female	23	Sharpness	level2	#FFFF0000	2818.33	#FFFF0000	1734.1
47	Male	24	Sharpness	level2	#FFFFFF00	2148.13	#FFFFFF00	951.054
48	Male	25	Sharpness	level2	#FFFF00FF	9801.12	#FFFF00FF	1064.74
49	Female	24	Sharpness	level2	#FF0000FF	1091.55	#FF0000FF	2168.01
50	Female	23	Sharpness	level2	#FFFF0000	2979.9	#FFFF0000	1504.8
51	Male	24	Sharpness	level2	#FFFF0000	4890.2	#FFFF0000	2351.2
52	Male	53	Sharpness	level2	#FF00FFFF	4086.16	#FF00FFFF	1223.93
1	Male	24	Sharpness	level1	#FF00FFFF	8208.38	#FF009999	1219.2
2	Male	20	Sharpness	level1	#FFFFA500	2484.93	#FFCC8500	9800.08
3	Male	23	Sharpness	level1	#FF00FFFF	2750.1	#FF7FFFFF	2719.07
4	Male	37	Sharpness	level1	#FFFF00FF	2917.11	#FFFF7FFF	18029.1
5	Male	22	Sharpness	level1	#FF00FFFF	1637.1	#FFB3FFFF	2424.07
6	Female	25	Sharpness	level1	#FF00FF00	9480.71	#FF80FF7F	1024.06
7	Female	22	Sharpness	level1	#FFFFA500	4192.9	#FF996300	2085.46
8	Male	22	Sharpness	level1	#FFFF00FF	5843.51	#FFFFB3FF	3663.21
9	Male	21	Sharpness	level1	#FF0000FF	1918.28	#FF0000FF	1633.09
10	Male	21	Sharpness	level1	#FFFF00FF	8422.02	#FFCC00CC	5005.83
11	Female	23	Sharpness	level1	#FFFFA500	1908.11	#FFCC8500	3295.52
12	Female	34	Sharpness	level1	#FF00FF00	2164.97	#FF009900	1703.97
13	Female	24	Sharpness	level1	#FF00FF00	1388.02	#FF00CC00	1990.74
14	Female	24	Sharpness	level1	#FF0000FF	3202.36	#FF0000CC	1792.1
15	Female	23	Sharpness	level1	#FF00FFFF	5413.49	#FF009999	3373.19
16	Male	27	Sharpness	level1	#FFFF0000	4405.42	#FFFF0000	3151.18
17	Male	23	Sharpness	level1	#FF00FF00	4068.24	#FF00CC00	1176.3
18	Female	51	Sharpness	level1	#FFFFFF00	14306.9	#FFFFFF00	1547.86
19	Female	39	Sharpness	level1	#FF00FFFF	4892	#FF00CCCC	1283.23
20	Female	38	Sharpness	level1	#FFFFA500	7798.36	#FFCC8500	5535.78
21	Male	22	Sharpness	level1	#FF00FFFF	1213.93	#FF00FFFF	1663.8
22	Female	42	Sharpness	level1	#FFFF00FF	8419.61	#FFFF00FF	2835.16
23	Female	23	Sharpness	level1	#FF00FFFF	9349.71	#FFE6FFFF	1232.07
24	Female	42	Sharpness	level1	#FF00FFFF	3039.41	#FF7FFFFF	2978.06
25	Female	23	Sharpness	level1	#FFFF00FF	4704.1	#FFFF00FF	3753.07
26	Female	52	Sharpness	level1	#FF00FFFF	5476.07	#FF7FFFFF	1439.07
27	Female	50	Sharpness	level1	#FFFFFF00	13244.1	#FFFFFF7F	15880.1
28	Male	25	Sharpness	level1	#FF00FFFF	2238.35	#FF00FFFF	1415.82
29	Male	25	Sharpness	level1	#FF00FF00	4472.1	#FF00CC00	1378.07
30	Female	45	Sharpness	level1	#FFFFA500	9473.12	#FFFFD37F	2810.07
31	Male	25	Sharpness	level1	#FF00FF00	2343.22	#FF00FF00	1345.08
32	Male	23	Sharpness	level1	#FF00FF00	5049.1	#FF00CC00	6131.07
33	Male	26	Sharpness	level1	#FF0000FF	4734.11	#FF000099	135.008
34	Female	34	Sharpness	level1	#FFFFA500	2748.46	#FFFFD37F	1024.18
35	Female	23	Sharpness	level1	#FF0000FF	6652.38	#FF0000FF	1271.73
36	Male	24	Sharpness	level1	#FFFF0000	7549.31	#FFCC0000	2856.55
37	Female	24	Sharpness	level1	#FFFFA500	4622.12	#FFFFA500	1759.06
38	Male	23	Sharpness	level1	#FFFFFF00	1589.03	#FFFFFFB3	832.603
39	Male	22	Sharpness	level1	#FF0000FF	2829.33	#FF0000FF	624.036
40	Female	22	Sharpness	level1	#FF0000FF	1575.26	#FF0000FF	1168.07
41	Female	24	Sharpness	level1	#FFFFFF00	3981.9	#FFFFFF7F	3359.7
42	Male	46	Sharpness	level1	#FFFFA500	3473.4	#FFFFD37F	6950.46
43	Male	38	Sharpness	level1	#FFFF0000	7916.82	#FFFF0000	1876.54
44	Female	24	Sharpness	level1	#FFFFFF00	7441.62	#FFFFFF00	2824.16
45	Male	22	Sharpness	level1	#FF00FF00	11974.1	#FF00FF00	1977.98
46	Female	23	Sharpness	level1	#FF0000FF	12050	#FF807FFF	5986.34
47	Male	24	Sharpness	level1	#FF00FF00	3132.35	#FF00FF00	2066.12
48	Male	25	Sharpness	level1	#FFFF00FF	3529.49	#FFFF00FF	1592.13
49	Female	24	Sharpness	level1	#FF00FFFF	3042.29	#FFE6FFFF	2615.98
50	Female	23	Sharpness	level1	#FFFF00FF	1556.07	#FFFF7FFF	984.943
51	Male	24	Sharpness	level1	#FFFFA500	3244.41	#FFFFA500	1963.28
52	Male	53	Sharpness	level1	#FFFFFF00	2628.63	#FFFFFF00	3639.65
1	Male	24	Roughness	1	#FFFFA500	4542.5	#FF664200	4465.8
2	Male	20	Roughness	1	#FF00FFFF	6637.9	#FF00CCCC	1753.07
3	Male	23	Roughness	1	#FFFFFF00	1028.1	#FFFFFF00	2607.07
4	Male	37	Roughness	1	#FFFFA500		#FFCC8500	6226.07
5	Male	22	Roughness	1	#FF00FF00	1468.1	#FF80FF7F	1643.07
6	Female	25	Roughness	1	#FFFF00FF	8855.68	#FF0000CC	808.046
7	Female	22	Roughness	1	#FFFF00FF	11976.3	#FF990099	4470.35
8	Male	22	Roughness	1	#FFFFFF00	4074.41	#FF00FF00	3008.17
9	Male	21	Roughness	1	#FFFFA500	5060.46	#FF664200	963.055
10	Male	21	Roughness	1	#FFFF0000	3881.91	#FFFF7F7F	1313.02
11	Female	23	Roughness	1	#FF0000FF	2553.82	#FF0000FF	595.17
12	Female	34	Roughness	1	#FFFFA500	2037.4	#FFCC8500	2349.5
13	Female	24	Roughness	1	#FFFFA500	1820.45	#FFFFD37F	2272.36
14	Female	24	Roughness	1	#FFFF00FF	1710.27	#FF990099	1412.08
15	Female	23	Roughness	1	#FF00FF00	11003.9	#FF00FF00	952.061
16	Male	27	Roughness	1	#FFFF0000	6327.53	#FFFF0000	3471.2
17	Male	23	Roughness	1	#FF0000FF	10412.8	#FFFF0000	1944.91
18	Female	51	Roughness	1	#FF0000FF	9181.41	#FF0000CC	5720.82
19	Female	39	Roughness	1	#FFFFA500	3325.42	#FF664200	2676.62
20	Female	38	Roughness	1	#FFFF00FF	2394.48	#FFFFB3FF	599.976
21	Male	22	Roughness	1	#FF00FF00	1685.54	#FF00FF00	1416.08
22	Female	42	Roughness	1	#FFFF00FF	4606.44	#FF990099	4742.27
23	Female	23	Roughness	1	#FFFFFF00	2810.88	#FFFFFF7F	2096.12
24	Female	42	Roughness	1	#FF00FFFF	1057.23	#FF7FFFFF	1431.98
25	Female	23	Roughness	1	#FFFF00FF	14746.1	#FF7FFFFF	4305.07
26	Female	52	Roughness	1	#FFFFA500	6179.1	#FF664200	3279.07
27	Female	50	Roughness	1	#FFFF0000	4971.1	#FFFFE6E6	3728.07
28	Male	25	Roughness	1	#FFFFA500	15435.7	#FFCC8500	3367.54
29	Male	25	Roughness	1	#FFFF0000	8955.11	#FFFF0000	3781.07
30	Female	45	Roughness	1	#FFFF00FF	5451.1	#FFFF7FFF	7095.07
31	Male	25	Roughness	1	#FFFFFF00	13514.1	#FFFFFF7F	4920.28
32	Male	23	Roughness	1	#FF0000FF		#FF0000FF	11001.1
33	Male	26	Roughness	1	#FFFFFF00	4126.1	#FFFFFF00	147.008
34	Female	34	Roughness	1	#FF00FF00	5107.13	#FF00CC00	1231.7
35	Female	23	Roughness	1	#FFFFFF00	13597	#FFFFFFE6	6280.62
36	Male	24	Roughness	1	#FF00FF00	2178.45	#FFB3FFB3	1471.84
37	Female	24	Roughness	1	#FFFF00FF	1477.1	#FFCC00CC	8201.11
38	Male	23	Roughness	1	#FFFFA500	2213.67	#FF664200	1942.61
39	Male	22	Roughness	1	#FFFF00FF	996.229	#FFFF7FFF	1040.06
40	Female	22	Roughness	1	#FFFFA500	1885.28	#FFCC8500	918.053
41	Female	24	Roughness	1	#FFFF00FF	8977.97	#FFFF00FF	10352.5
42	Male	46	Roughness	1	#FF00FFFF	5623	#FF00FFFF	1951.92
43	Male	38	Roughness	1	#FF0000FF	6337.86	#FF0000CC	3256.18
44	Female	24	Roughness	1	#FFFF00FF	5392.48	#FFCC00CC	4400.25
45	Male	22	Roughness	1	#FFFF00FF	7395.91	#FFFF7FFF	1894.46
46	Female	23	Roughness	1	#FF0000FF	5047.46	#FF0000FF	1708.1
47	Male	24	Roughness	1	#FFFFA500	1046.23	#FF664200	1653.1
48	Male	25	Roughness	1	#FFFFA500	3496.61	#FFFFD37F	1944.38
49	Female	24	Roughness	1	#FF00FFFF	2684.51	#FFB3FFFF	4023.2
50	Female	23	Roughness	1	#FFFFA500	3053.9	#FF664200	821.406
51	Male	24	Roughness	1	#FFFF00FF	4199.06	#FFCC00CC	2255.59
52	Male	53	Roughness	1	#FFFF00FF	2781.04	#FFCC00CC	3784.07
1	Male	24	Roughness	0.7	#FFFFA500	3924.93	#FF996300	1513.82
2	Male	20	Roughness	0.7	#FF00FFFF	2637.9	#FF00CCCC	1921.07
3	Male	23	Roughness	0.7	#FFFFFF00	7976.01	#FFFFFF00	7029.08
4	Male	37	Roughness	0.7	#FFFFA500	8212.11	#FFCC8500	9133.08
5	Male	22	Roughness	0.7	#FF00FF00	9817.09	#FF80FF7F	4738.07
6	Female	25	Roughness	0.7	#FFFF00FF	9273.72	#FF0000CC	793.045
7	Female	22	Roughness	0.7	#FFFF00FF	3964.9	#FF990099	2422.55
8	Male	22	Roughness	0.7	#FFFFFF00	2350.3	#FF00FF00	7199.41
9	Male	21	Roughness	0.7	#FFFFA500	3711.38	#FF996300	1251.07
10	Male	21	Roughness	0.7	#FFFF0000	5302.59	#FFFF7F7F	1330.48
11	Female	23	Roughness	0.7	#FF0000FF	10600.4	#FF0000FF	1348.86
12	Female	34	Roughness	0.7	#FFFFA500	2095.61	#FFCC8500	2097.7
13	Female	24	Roughness	0.7	#FFFFA500	2675.12	#FFFFA500	3071.73
14	Female	24	Roughness	0.7	#FFFF00FF	5850.51	#FF990099	1079.06
15	Female	23	Roughness	0.7	#FF00FF00	5315.42	#FF00FF00	897.046
16	Male	27	Roughness	0.7	#FFFF0000	2917.34	#FFFF0000	4337.25
17	Male	23	Roughness	0.7	#FFFFFF00	5874.28	#FFFFFFB3	1632.58
18	Female	51	Roughness	0.7	#FF0000FF	6431.96	#FF0000CC	3414.33
19	Female	39	Roughness	0.7	#FF00FFFF	10582.1	#FF00FFFF	4196.11
20	Female	38	Roughness	0.7	#FF00FF00	4989.55	#FF00CC00	3799.57
21	Male	22	Roughness	0.7	#FF00FF00	2438.95	#FF00FF00	870.954
22	Female	42	Roughness	0.7	#FFFF00FF	2543.32	#FF990099	1206.07
23	Female	23	Roughness	0.7	#FFFFFF00	3040.89	#FFFFFF7F	1304.08
24	Female	42	Roughness	0.7	#FF00FFFF	2522.36	#FF7FFFFF	3171.61
25	Female	23	Roughness	0.7	#FFFF00FF	4385.1	#FF7FFFFF	4657.07
26	Female	52	Roughness	0.7	#FFFFA500	10437.1	#FF996300	8719.08
27	Female	50	Roughness	0.7	#FFFF0000	7949.12	#FFFFE6E6	3020.07
28	Male	25	Roughness	0.7	#FFFFA500	5925.31	#FFCC8500	9735.84
29	Male	25	Roughness	0.7	#FFFF0000	2793.09	#FFFF0000	3462.07
30	Female	45	Roughness	0.7	#FF00FF00	2802.11	#FF00FF00	1646.07
31	Male	25	Roughness	0.7	#FFFFFF00	3431.37	#FFFFFF7F	2416.14
32	Male	23	Roughness	0.7	#FF0000FF	7801.12	#FF0000FF	5924.07
33	Male	26	Roughness	0.7	#FFFFFF00	2514.1	#FFFFFF00	317.018
34	Female	34	Roughness	0.7	#FF00FF00	2851.75	#FF00CC00	880.206
35	Female	23	Roughness	0.7	#FFFFFF00	2734.04	#FFFFFFE6	10560.2
36	Male	24	Roughness	0.7	#FF00FF00	10022	#FFB3FFB3	1167.89
37	Female	24	Roughness	0.7	#FFFF00FF	7491.01	#FFCC00CC	1417.06
38	Male	23	Roughness	0.7	#FF00FFFF	2365.32	#FF00CCCC	1103.44
39	Male	22	Roughness	0.7	#FF00FF00	1367.25	#FF00FF00	2207.13
40	Female	22	Roughness	0.7	#FFFFA500	7707.61	#FFCC8500	2015.12
41	Female	24	Roughness	0.7	#FFFF00FF	7839.66	#FFFF00FF	1774.83
42	Male	46	Roughness	0.7	#FF00FFFF	4374.49	#FF00FFFF	1071.84
43	Male	38	Roughness	0.7	#FF0000FF	4529.03	#FF0000CC	761.269
44	Female	24	Roughness	0.7	#FFFF00FF	5113.46	#FFCC00CC	2608.15
45	Male	22	Roughness	0.7	#FFFF00FF	2488.38	#FFFF7FFF	899.601
46	Female	23	Roughness	0.7	#FF0000FF	4596.44	#FF0000FF	1552.09
47	Male	24	Roughness	0.7	#FFFFA500	1007.23	#FFFFA500	1170.07
48	Male	25	Roughness	0.7	#FFFFFF00	5187.81	#FFFFFF00	3143.24
49	Female	24	Roughness	0.7	#FF00FFFF	3689.65	#FFB3FFFF	2131.84
50	Female	23	Roughness	0.7	#FFFFA500	5848.59	#FF996300	2598.56
51	Male	24	Roughness	0.7	#FFFF00FF	1965.58	#FFCC00CC	2647.84
52	Male	53	Roughness	0.7	#FFFF00FF	2829.52	#FFCC00CC	2296.96
1	Male	24	Roughness	0.3	#FFFFA500	3024.93	#FFFFA500	1213.82
2	Male	20	Roughness	0.3	#FF00FFFF	2737.9	#FF009999	1821.07
3	Male	23	Roughness	0.3	#FFFFFF00	5976.01	#FFFFFF00	7129.08
4	Male	37	Roughness	0.3	#FFFFA500	6212.11	#FFCC8500	9833.08
5	Male	22	Roughness	0.3	#FF00FF00	8697.09	#FF80FF7F	4338.07
6	Female	25	Roughness	0.3	#FF00FFFF	7273.71	#FF0000CC	703.045
7	Female	22	Roughness	0.3	#FFFF00FF	5964.9	#FF990099	2822.55
8	Male	22	Roughness	0.3	#FF0000FF	1350.3	#FF0000FF	7029.41
9	Male	21	Roughness	0.3	#FF00FF00	2711.38	#FF00CC00	1851.07
10	Male	21	Roughness	0.3	#FFFF0000	4302.59	#FFFF7F7F	1830.48
11	Female	23	Roughness	0.3	#FF0000FF	8600.37	#FF0000CC	1248.86
12	Female	34	Roughness	0.3	#FFFFA500	995.605	#FFCC8500	2197.7
13	Female	24	Roughness	0.3	#FFFFA500	2275.12	#FF996300	3271.73
14	Female	24	Roughness	0.3	#FFFF00FF	3850.51	#FF990099	1779.06
15	Female	23	Roughness	0.3	#FF00FF00	2315.48	#FF00FF00	997.046
16	Male	27	Roughness	0.3	#FFFF0000	3917.34	#FFFF0000	4037.25
17	Male	23	Roughness	0.3	#FFFFFF00	3874.28	#FFFFFFB3	1232.58
18	Female	51	Roughness	0.3	#FF0000FF	6253.96	#FF000099	3514.33
19	Female	39	Roughness	0.3	#FF00FFFF	6582.12	#FF0000CC	4006.11
20	Female	38	Roughness	0.3	#FF00FF00	3989.55	#FF009900	3802.57
21	Male	22	Roughness	0.3	#FF00FF00	1338.95	#FF00CC00	890.954
22	Female	42	Roughness	0.3	#FFFF00FF	2943.32	#FF990099	1296.07
23	Female	23	Roughness	0.3	#FFFFFF00	12175.9	#FFFFFF7F	1394.08
24	Female	42	Roughness	0.3	#FF00FFFF	1522.36	#FF7FFFFF	3871.61
25	Female	23	Roughness	0.3	#FF00FFFF	5385.1	#FF7FFFFF	4657.07
26	Female	52	Roughness	0.3	#FF00FF00	9437.11	#FFB3FFB3	8719.08
27	Female	50	Roughness	0.3	#FFFF0000	6949.11	#FFFFE6E6	3020.07
28	Male	25	Roughness	0.3	#FFFFA500	4925.31	#FFCC8500	9735.84
29	Male	25	Roughness	0.3	#FFFF0000	7793.01	#FFFF0000	3862.07
30	Female	45	Roughness	0.3	#FF00FF00	3802.12	#FF00FF00	1646.07
31	Male	25	Roughness	0.3	#FFFFFF00	4431.37	#FFFFFF7F	2416.14
32	Male	23	Roughness	0.3	#FF0000FF	6801.13	#FF000099	6244.07
33	Male	26	Roughness	0.3	#FFFFFF00	1514.1	#FFFFFF00	317.018
34	Female	34	Roughness	0.3	#FF00FF00	1477.85	#FF009900	880.206
35	Female	23	Roughness	0.3	#FFFFFF00	9734.1	#FFFFFFE6	10560.2
36	Male	24	Roughness	0.3	#FF00FF00	8022.13	#FFB3FFB3	1167.89
37	Female	24	Roughness	0.3	#FFFF00FF	5491.11	#FFCC00CC	1417.06
38	Male	23	Roughness	0.3	#FF00FFFF	1365.32	#FF009999	1103.44
39	Male	22	Roughness	0.3	#FF00FF00	2367.25	#FF00CC00	2207.13
40	Female	22	Roughness	0.3	#FFFFA500	6707.61	#FFCC8500	2015.12
41	Female	24	Roughness	0.3	#FFFF00FF	3839.66	#FFFF00FF	1774.83
42	Male	46	Roughness	0.3	#FF00FFFF	4225.49	#FF009999	1071.84
43	Male	38	Roughness	0.3	#FF0000FF	2529.03	#FF000099	761.269
44	Female	24	Roughness	0.3	#FFFF00FF	2113.46	#FFCC00CC	2608.15
45	Male	22	Roughness	0.3	#FF00FFFF	2088.38	#FFB3FFFF	899.601
46	Female	23	Roughness	0.3	#FF0000FF	3596.43	#FF0000FF	1552.09
47	Male	24	Roughness	0.3	#FFFFA500	1807.23	#FFFFE5B3	1170.07
48	Male	25	Roughness	0.3	#FFFFFF00	4187.81	#FFFFFF00	3143.24
49	Female	24	Roughness	0.3	#FF00FFFF	2689.65	#FFB3FFFF	2131.84
50	Female	23	Roughness	0.3	#FFFFA500	3848.59	#FFCC8500	2598.56
51	Male	24	Roughness	0.3	#FFFF00FF	9327.58	#FFCC00CC	2647.84
52	Male	53	Roughness	0.3	#FFFF00FF	2170.48	#FFCC00CC	2296.96
1	Male	24	Roughness	0	#FFFFFF00	2143.12	#FFFFFF7F	1594.76
2	Male	20	Roughness	0	#FFFFA500	2864.91	#FFFFB3FF	3621.07
3	Male	23	Roughness	0	#FFFF0000	4590.1	#FF660000	1944.07
4	Male	37	Roughness	0	#FF00FF00	3521.1	#FF00CC00	2664.07
5	Male	22	Roughness	0	#FF00FF00	3260.1	#FF009900	143.008
6	Female	25	Roughness	0	#FFFF0000	2145.29	#FF660000	888.051
7	Female	22	Roughness	0	#FF00FF00	12419.1	#FF00FF00	4462.53
8	Male	22	Roughness	0	#FFFFA500	3819.39	#FFFFD37F	2200.13
9	Male	21	Roughness	0	#FF0000FF	1577.26	#FF000099	1201.07
10	Male	21	Roughness	0	#FF00FF00	1923.96	#FF0000CC	2195.87
11	Female	23	Roughness	0	#FFFFA500	7793.12	#FFFFA500	1656.06
12	Female	34	Roughness	0	#FF00FFFF	3153.53	#FF00FFFF	877.691
13	Female	24	Roughness	0	#FFFFFF00	1780.31	#FFCCCC00	3256.47
14	Female	24	Roughness	0	#FF00FF00	1522.26	#FF00CC00	3513.2
15	Female	23	Roughness	0	#FF00FF00	1972.21	#FF009900	968.051
16	Male	27	Roughness	0	#FF00FFFF	3583.38	#FF009999	2817.16
17	Male	23	Roughness	0	#FFFFFF00	1524.98	#FF666600	1366.93
18	Female	51	Roughness	0	#FFFF00FF	7611.91	#FFCC00CC	4087.86
19	Female	39	Roughness	0	#FFFF0000	2943.65	#FF990000	5368.45
20	Female	38	Roughness	0	#FF00FF00	3613.84	#FF80FF7F	3704.07
21	Male	22	Roughness	0	#FF0000FF	2774.46	#FF0000FF	1232.36
22	Female	42	Roughness	0	#FF00FFFF	3247.36	#FF009999	1809.1
23	Female	23	Roughness	0	#FFFFFF00	2451.85	#FF666600	696.04
24	Female	42	Roughness	0	#FF00FF00	1396.17	#FF00CC00	2440.59
25	Female	23	Roughness	0	#FF00FFFF	9896.09	#FF009999	9086.08
26	Female	52	Roughness	0	#FF00FFFF	2194.1	#FF00CCCC	1732.07
27	Female	50	Roughness	0	#FF00FF00	8207.12	#FF000099	2656.07
28	Male	25	Roughness	0	#FF0000FF	3742.28	#FF0000FF	2607.82
29	Male	25	Roughness	0	#FFFFFF00	4529.1	#FFFFFF00	2379.07
30	Female	45	Roughness	0	#FF00FFFF	7442.11	#FF7FFFFF	1549.07
31	Male	25	Roughness	0	#FFFFA500	5787.5	#FFFFD37F	1327.08
32	Male	23	Roughness	0	#FF00FF00	5149.08	#FF009900	3952.07
33	Male	26	Roughness	0	#FFFFFF00	5268.11	#FF999900	15222.1
34	Female	34	Roughness	0	#FFFF0000	2508.83	#FF990000	704.002
35	Female	23	Roughness	0	#FFFFA500	6525.15	#FFFFE5B3	3432.12
36	Male	24	Roughness	0	#FF00FF00	5517.18	#FF009900	4169.16
37	Female	24	Roughness	0	#FF0000FF	1502.07	#FF000099	812.047
38	Male	23	Roughness	0	#FF00FFFF	2473.77	#FF009999	1240.34
39	Male	22	Roughness	0	#FFFF0000	5629.49	#FF660000	2512.14
40	Female	22	Roughness	0	#FFFFFF00	7506.61	#FF666600	4301.25
41	Female	24	Roughness	0	#FFFF00FF	1891.22	#FF990099	6624.45
42	Male	46	Roughness	0	#FFFF00FF	4611.44	#FFCC00CC	2777.49
43	Male	38	Roughness	0	#FF00FFFF	1463.34	#FFE6FFFF	1257.59
44	Female	24	Roughness	0	#FF00FFFF	8128.64	#FF7FFFFF	16616
45	Male	22	Roughness	0	#FFFF00FF	2331.72	#FFFF7FFF	770.516
46	Female	23	Roughness	0	#FF00FF00	2818.33	#FF009900	1734.1
47	Male	24	Roughness	0	#FF0000FF	1148.18	#FF807FFF	951.054
48	Male	25	Roughness	0	#FF00FF00	9801.11	#FF006600	1064.74
49	Female	24	Roughness	0	#FF00FFFF	1091.55	#FF00CCCC	2168.01
50	Female	23	Roughness	0	#FF00FFFF	2979.9	#FF00CCCC	1504.8
51	Male	24	Roughness	0	#FFFFFF00	4890.2	#FF666600	2351.2
52	Male	53	Roughness	0	#FF00FFFF	4086.16	#FF009999	1223.93
1	Male	24	Tempo	200BPM	#FF0000FF	7771.75	#FFB3B3FF	2963.95
2	Male	20	Tempo	200BPM	#FFFF0000	2369.91	#FFFF0000	1777.07
3	Male	23	Tempo	200BPM	#FF00FF00	7232.11	#FF00CC00	3066.07
4	Male	37	Tempo	200BPM	#FF0000FF	5003.1	#FF0000FF	2509.07
5	Male	22	Tempo	200BPM	#FFFF0000	5055.1	#FFCC0000	3024.07
6	Female	25	Tempo	200BPM	#FFFFFF00	1438.85	#FFFFFF00	2384.14
7	Female	22	Tempo	200BPM	#FFFF0000	1390.23	#FFFF0000	1128.48
8	Male	22	Tempo	200BPM	#FFFF0000	2547.32	#FFFF0000	5024.29
9	Male	21	Tempo	200BPM	#FFFF00FF	1583.2	#FFFF00FF	1499.09
10	Male	21	Tempo	200BPM	#FF00FF00	1003.83	#FF00FF00	1819.65
11	Female	23	Tempo	200BPM	#FFFFFF00	5308.47	#FFFFFF00	2768.48
12	Female	34	Tempo	200BPM	#FF00FF00	974.506	#FF80FF7F	2417.08
13	Female	24	Tempo	200BPM	#FFFFFF00	2436.4	#FFFFFF00	4296
14	Female	24	Tempo	200BPM	#FFFFFF00	4635.44	#FFFFFF00	1208.07
15	Female	23	Tempo	200BPM	#FF00FFFF	2770.33	#FF009999	2264.13
16	Male	27	Tempo	200BPM	#FF0000FF	1311.25	#FF0000FF	3296.19
17	Male	23	Tempo	200BPM	#FFFF0000	8600.33	#FFCC0000	1127.85
18	Female	51	Tempo	200BPM	#FFFFA500	7333.32	#FFFFA500	2937.89
19	Female	39	Tempo	200BPM	#FF00FFFF	1031.84	#FF006666	2221.76
20	Female	38	Tempo	200BPM	#FF00FFFF	1053.39	#FF009999	1280.14
21	Male	22	Tempo	200BPM	#FF00FF00	1242.64	#FF80FF7F	663.774
22	Female	42	Tempo	200BPM	#FFFFA500	7685.61	#FFFFA500	7488.43
23	Female	23	Tempo	200BPM	#FFFFFF00	8716.67	#FFFFFF7F	2512.14
24	Female	42	Tempo	200BPM	#FF00FFFF	2890.7	#FF00FFFF	1121.15
25	Female	23	Tempo	200BPM	#FFFFFF00	7437.02	#FFCCCC00	8973.08
26	Female	52	Tempo	200BPM	#FF0000FF	2939.07	#FF0000FF	147.008
27	Female	50	Tempo	200BPM	#FFFF00FF	6538.11	#FFFF7FFF	7114.07
28	Male	25	Tempo	200BPM	#FFFF0000	3037.82	#FFFF0000	2167.99
29	Male	25	Tempo	200BPM	#FFFF0000	2679.1	#FFFF7F7F	4194.07
30	Female	45	Tempo	200BPM	#FFFFFF00	6245.87	#FFFFFF00	11689.1
31	Male	25	Tempo	200BPM	#FFFFFF00	9061.69	#FFFFFFB3	2949.17
32	Male	23	Tempo	200BPM	#FF0000FF	6545.08	#FF0000CC	3889.07
33	Male	26	Tempo	200BPM	#FFFF0000	5417.1	#FFFF0000	4823.07
34	Female	34	Tempo	200BPM	#FF00FF00	6186.59	#FF00FF00	1096.23
35	Female	23	Tempo	200BPM	#FFFFA500	8244.97	#FFFFA500	6111.75
36	Male	24	Tempo	200BPM	#FF00FFFF	4694.08	#FF006666	2832.23
37	Female	24	Tempo	200BPM	#FF0000FF	1044.1	#FF0000CC	2472.07
38	Male	23	Tempo	200BPM	#FFFF0000	2483.82	#FFFF0000	1936.02
39	Male	22	Tempo	200BPM	#FFFFFF00	2964.23	#FFFFFF00	832.048
40	Female	22	Tempo	200BPM	#FF00FF00	5678.5	#FF00FF00	2646.15
41	Female	24	Tempo	200BPM	#FFFFFF00	2894.22	#FFFFFF00	3183.11
42	Male	46	Tempo	200BPM	#FF00FFFF	7781.31	#FF009999	6576.07
43	Male	38	Tempo	200BPM	#FF00FFFF	11721.9	#FF009999	1878.77
44	Female	24	Tempo	200BPM	#FFFF00FF	4873.45	#FFFF7FFF	2880.16
45	Male	22	Tempo	200BPM	#FFFF00FF	6522.43	#FFFF00FF	2340.47
46	Female	23	Tempo	200BPM	#FFFFFF00	17567.8	#FFFFFF00	3842.22
47	Male	24	Tempo	200BPM	#FFFF0000	1954.28	#FFCC0000	2299.13
48	Male	25	Tempo	200BPM	#FFFF0000	3714.77	#FFFF0000	2850.02
49	Female	24	Tempo	200BPM	#FFFFFF00	2411.14	#FFFFFF00	2816.42
50	Female	23	Tempo	200BPM	#FFFF0000	11451.3	#FFFF0000	937.26
51	Male	24	Tempo	200BPM	#FFFFA500	4125.56	#FFFFA500	3499.05
52	Male	53	Tempo	200BPM	#FFFFFF00	3499.05	#FFFFFF00	1352.84
1	Male	24	Tempo	150BPM	#FF00FFFF	6298.52	#FF00CCCC	5911.35
2	Male	20	Tempo	150BPM	#FFFFFF00	2190.93	#FFFFFF00	2091.07
3	Male	23	Tempo	150BPM	#FFFFA500	2046.1	#FFFFA500	2616.07
4	Male	37	Tempo	150BPM	#FFFF00FF	6245.1	#FFFF00FF	3025.07
5	Male	22	Tempo	150BPM	#FFFFFF00	4702.1	#FFFFFF00	1848.07
6	Female	25	Tempo	150BPM	#FFFF0000	1657.27	#FF660000	1369.08
7	Female	22	Tempo	150BPM	#FF00FFFF	2999.01	#FF00FFFF	1176.93
8	Male	22	Tempo	150BPM	#FF00FF00	2019.82	#FFB3FFB3	4223.24
9	Male	21	Tempo	150BPM	#FF0000FF	1534.2	#FF0000FF	2371.14
10	Male	21	Tempo	150BPM	#FF0000FF	3422.89	#FF000066	934.659
11	Female	23	Tempo	150BPM	#FFFF00FF	5397.34	#FFCC00CC	1896.94
12	Female	34	Tempo	150BPM	#FFFF0000	3246.35	#FF990000	1342.76
13	Female	24	Tempo	150BPM	#FF00FF00	5393.93	#FF00FF00	736.333
14	Female	24	Tempo	150BPM	#FF00FF00	2922.22	#FFB3FFB3	3496.2
15	Female	23	Tempo	150BPM	#FFFFA500	3880.4	#FFFFA500	928.054
16	Male	27	Tempo	150BPM	#FFFF0000	2602.32	#FF990000	1424.08
17	Male	23	Tempo	150BPM	#FFFFA500	2763.98	#FFFFA500	4239.85
18	Female	51	Tempo	150BPM	#FFFF0000	6761.14	#FF660000	5179.02
19	Female	39	Tempo	150BPM	#FF00FFFF	4536.79	#FF7FFFFF	4170.07
20	Female	38	Tempo	150BPM	#FF0000FF	2293.86	#FF000099	1399.99
21	Male	22	Tempo	150BPM	#FF0000FF	2735.91	#FF807FFF	1880.33
22	Female	42	Tempo	150BPM	#FF0000FF	4737.44	#FF000099	1545.09
23	Female	23	Tempo	150BPM	#FFFFA500	3600.92	#FFFFD37F	1375.08
24	Female	42	Tempo	150BPM	#FFFFA500	2665.94	#FFFFA500	1425.86
25	Female	23	Tempo	150BPM	#FFFFFF00	7079.11	#FFFFFF7F	7354.07
26	Female	52	Tempo	150BPM	#FFFF00FF	6108.1	#FFFF7FFF	3793.07
27	Female	50	Tempo	150BPM	#FFFFA500	3940.1	#FFFFE5B3	8133.07
28	Male	25	Tempo	150BPM	#FF0000FF	9478.51	#FF000099	15263.8
29	Male	25	Tempo	150BPM	#FFFF0000	4518.1	#FFFF0000	4315.07
30	Female	45	Tempo	150BPM	#FFFFFF00	2409.1	#FFFFFF7F	1928.07
31	Male	25	Tempo	150BPM	#FF00FF00	6999.57	#FFE6FFE6	3700.21
32	Male	23	Tempo	150BPM	#FF0000FF	8038.02	#FF000099	2082.07
33	Male	26	Tempo	150BPM	#FFFF0000	6422.11	#FFCC0000	145.008
34	Female	34	Tempo	150BPM	#FFFF00FF	1187.92	#FFFF00FF	1256.62
35	Female	23	Tempo	150BPM	#FF0000FF	4542.77	#FF807FFF	14198.9
36	Male	24	Tempo	150BPM	#FFFF0000	2614.45	#FF990000	2583.84
37	Female	24	Tempo	150BPM	#FFFF00FF	2844.09	#FFFF00FF	935.053
38	Male	23	Tempo	150BPM	#FF00FFFF	1177.41	#FF7FFFFF	800.532
39	Male	22	Tempo	150BPM	#FF00FF00	3106.84	#FF00FF00	3192.18
40	Female	22	Tempo	150BPM	#FF00FFFF	4877.45	#FF00FFFF	8977.51
41	Female	24	Tempo	150BPM	#FFFFFF00	9895.51	#FFCCCC00	5954.21
42	Male	46	Tempo	150BPM	#FF0000FF	9291.81	#FF0000CC	1537.72
43	Male	38	Tempo	150BPM	#FFFF0000	2898	#FF660000	3794.49
44	Female	24	Tempo	150BPM	#FF00FFFF	7080.87	#FFB3FFFF	2232.13
45	Male	22	Tempo	150BPM	#FFFF00FF	4965.25	#FFFF00FF	1962.09
46	Female	23	Tempo	150BPM	#FFFFFF00	4401.42	#FFFFFF00	5592.32
47	Male	24	Tempo	150BPM	#FFFFFF00	2604.86	#FFFFFF00	1822.1
48	Male	25	Tempo	150BPM	#FFFF0000	5009.53	#FFFF0000	2262.61
49	Female	24	Tempo	150BPM	#FF00FFFF	2379.13	#FF009999	2400.55
50	Female	23	Tempo	150BPM	#FFFFFF00	2578.23	#FFFFFF00	888.132
51	Male	24	Tempo	150BPM	#FFFFA500	3142.38	#FFFFA500	2551.96
52	Male	53	Tempo	150BPM	#FFFFFF00	5731.68	#FFCCCC00	1078.96
1	Male	24	Tempo	120BPM	#FFFFFF00	2143.12	#FFFFFF7F	1594.76
2	Male	20	Tempo	120BPM	#FFFFA500	3864.91	#FF664200	3621.07
3	Male	23	Tempo	120BPM	#FFFF0000	4590.1	#FF660000	1944.07
4	Male	37	Tempo	120BPM	#FF00FF00	3521.1	#FF00CC00	2664.07
5	Male	22	Tempo	120BPM	#FF0000FF	3260.1	#FF0000FF	143.008
6	Female	25	Tempo	120BPM	#FFFF0000	2145.29	#FF660000	888.051
7	Female	22	Tempo	120BPM	#FF00FF00	7419.13	#FF00FF00	4462.53
8	Male	22	Tempo	120BPM	#FFFFA500	3819.33	#FF996300	2200.13
9	Male	21	Tempo	120BPM	#FF0000FF	1577.26	#FF000099	1201.07
10	Male	21	Tempo	120BPM	#FF0000FF	1923.96	#FF0000FF	2195.87
11	Female	23	Tempo	120BPM	#FFFFA500	7793.11	#FF996300	1656.06
12	Female	34	Tempo	120BPM	#FF00FFFF	3153.53	#FF00FFFF	877.691
13	Female	24	Tempo	120BPM	#FFFFFF00	1780.32	#FFCCCC00	3256.47
14	Female	24	Tempo	120BPM	#FF00FF00	1522.26	#FF00CC00	3513.2
15	Female	23	Tempo	120BPM	#FF00FF00	1972.22	#FF009900	968.051
16	Male	27	Tempo	120BPM	#FF0000FF	3583.38	#FF0000FF	2817.16
17	Male	23	Tempo	120BPM	#FFFFFF00	1524.98	#FF666600	1366.93
18	Female	51	Tempo	120BPM	#FFFF00FF	10611.9	#FFCC00CC	4087.86
19	Female	39	Tempo	120BPM	#FFFF0000	2943.65	#FF990000	5368.45
20	Female	38	Tempo	120BPM	#FF00FF00	3613.84	#FF80FF7F	3704.07
21	Male	22	Tempo	120BPM	#FF0000FF	2774.46	#FF0000FF	1232.36
22	Female	42	Tempo	120BPM	#FF00FFFF	3247.36	#FF009999	1809.1
23	Female	23	Tempo	120BPM	#FFFFFF00	3451.85	#FF666600	696.04
24	Female	42	Tempo	120BPM	#FF0000FF	1396.17	#FF0000FF	2440.59
25	Female	23	Tempo	120BPM	#FF00FFFF	7994.09	#FF009999	9086.08
26	Female	52	Tempo	120BPM	#FF00FFFF	2194.1	#FF00CCCC	1732.07
27	Female	50	Tempo	120BPM	#FF0000FF	9109.12	#FF0000FF	2656.07
28	Male	25	Tempo	120BPM	#FF0000FF	3742.28	#FF0000FF	2607.82
29	Male	25	Tempo	120BPM	#FFFFFF00	4529.1	#FFFFFF00	2379.07
30	Female	45	Tempo	120BPM	#FFFF0000	7442.11	#FFCC0000	1549.07
31	Male	25	Tempo	120BPM	#FFFFA500	5787.5	#FFFFD37F	1327.08
32	Male	23	Tempo	120BPM	#FF00FF00	5149.08	#FF009900	3952.07
33	Male	26	Tempo	120BPM	#FFFFA500	5268.11	#FF996300	15222.1
34	Female	34	Tempo	120BPM	#FFFF0000	2508.83	#FF990000	704.002
35	Female	23	Tempo	120BPM	#FFFFA500	6525.15	#FFFFE5B3	3432.12
36	Male	24	Tempo	120BPM	#FF0000FF	5517.18	#FF0000FF	4169.16
37	Female	24	Tempo	120BPM	#FF0000FF	1502.07	#FF000099	812.047
38	Male	23	Tempo	120BPM	#FF00FFFF	3473.77	#FF009999	1240.34
39	Male	22	Tempo	120BPM	#FFFF0000	5629.49	#FF660000	2512.14
40	Female	22	Tempo	120BPM	#FFFFFF00	7506.61	#FF666600	4301.25
41	Female	24	Tempo	120BPM	#FFFF00FF	1891.22	#FF990099	6624.45
42	Male	46	Tempo	120BPM	#FFFF00FF	4611.44	#FFCC00CC	2777.49
43	Male	38	Tempo	120BPM	#FF00FFFF	1463.34	#FFE6FFFF	1257.59
44	Female	24	Tempo	120BPM	#FF00FFFF	8128.61	#FF7FFFFF	16616
45	Male	22	Tempo	120BPM	#FFFF00FF	3331.72	#FFFF7FFF	770.516
46	Female	23	Tempo	120BPM	#FF00FF00	2818.33	#FF009900	1734.1
47	Male	24	Tempo	120BPM	#FF0000FF	2148.12	#FF807FFF	951.054
48	Male	25	Tempo	120BPM	#FF0000FF	7801.11	#FF000099	1064.74
49	Female	24	Tempo	120BPM	#FF00FFFF	1091.55	#FF00CCCC	2168.01
50	Female	23	Tempo	120BPM	#FFFFA500	2979.9	#FFFFD37F	1504.8
51	Male	24	Tempo	120BPM	#FFFFFF00	4890.2	#FF999900	2351.2
52	Male	53	Tempo	120BPM	#FFFFA500	4086.16	#FFFFE5B3	1223.93
1	Male	24	Tempo	65BPM	#FF0000FF	3151.04	#FF000066	1276.92
2	Male	20	Tempo	65BPM	#FFFFA500	2551.91	#FFCC8500	2796.07
3	Male	23	Tempo	65BPM	#FFFFA500	7749.12	#FFFFA500	4625.07
4	Male	37	Tempo	65BPM	#FF0000FF	10237.1	#FF000099	15628.1
5	Male	22	Tempo	65BPM	#FF0000FF	3994.1	#FF0000CC	3023.07
6	Female	25	Tempo	65BPM	#FFFFA500	1849.28	#FFFFA500	1112.06
7	Female	22	Tempo	65BPM	#FF00FF00	10756.7	#FF00FF00	3062.38
8	Male	22	Tempo	65BPM	#FFFFFF00	3826.33	#FFFFFFB3	5552.32
9	Male	21	Tempo	65BPM	#FFFFA500	6906.57	#FF664200	2034.12
10	Male	21	Tempo	65BPM	#FFFF0000	15888.4	#FFFF0000	2532.21
11	Female	23	Tempo	65BPM	#FF0000FF	13810.5	#FF0000CC	3896.86
12	Female	34	Tempo	65BPM	#FF0000FF	3763.13	#FF0000CC	681.521
13	Female	24	Tempo	65BPM	#FF0000FF	4043.84	#FF000066	5983.99
14	Female	24	Tempo	65BPM	#FF0000FF	3162.35	#FF0000CC	1144.07
15	Female	23	Tempo	65BPM	#FF00FFFF	7739.26	#FF00FFFF	2101.12
16	Male	27	Tempo	65BPM	#FFFFFF00	4581.43	#FF999900	3142.18
17	Male	23	Tempo	65BPM	#FFFFFF00	6659.25	#FFCCCC00	6383.72
18	Female	51	Tempo	65BPM	#FFFF00FF	4804.23	#FFFF00FF	2193.82
19	Female	39	Tempo	65BPM	#FFFFA500	8304.92	#FF664200	3467.59
20	Female	38	Tempo	65BPM	#FF0000FF	2053.52	#FF000066	2527.97
21	Male	22	Tempo	65BPM	#FF0000FF	5557.4	#FF0000FF	1407.62
22	Female	42	Tempo	65BPM	#FFFFA500	4919.45	#FF664200	4203.24
23	Female	23	Tempo	65BPM	#FF00FF00	5884.94	#FF80FF7F	776.044
24	Female	42	Tempo	65BPM	#FFFF00FF	9000.12	#FFFF7FFF	6666.08
25	Female	23	Tempo	65BPM	#FF00FFFF	2288.22	#FF7FFFFF	2634.07
26	Female	52	Tempo	65BPM	#FFFF00FF	1950.1	#FFFF7FFF	1292.07
27	Female	50	Tempo	65BPM	#FF0000FF	2654.03	#FF0000CC	6377.07
28	Male	25	Tempo	65BPM	#FFFFA500	6028.09	#FF996300	2864.33
29	Male	25	Tempo	65BPM	#FF0000FF	11882.1	#FF0000CC	2621.07
30	Female	45	Tempo	65BPM	#FF00FFFF	6431.11	#FF00CCCC	2402.07
31	Male	25	Tempo	65BPM	#FF0000FF	11793.9	#FFE6E6FF	2609.15
32	Male	23	Tempo	65BPM	#FF00FFFF	7460.11	#FFB3FFFF	4963.07
33	Male	26	Tempo	65BPM	#FF00FFFF	8767.12	#FFB3FFFF	6785.07
34	Female	34	Tempo	65BPM	#FFFFA500	4445.09	#FF664200	1431.17
35	Female	23	Tempo	65BPM	#FFFFFF00	8251.82	#FF666600	8864.24
36	Male	24	Tempo	65BPM	#FF00FFFF	8365.43	#FFB3FFFF	8375.9
37	Female	24	Tempo	65BPM	#FF00FFFF	6249.08	#FF7FFFFF	1630.06
38	Male	23	Tempo	65BPM	#FFFFA500	1598.54	#FFCC8500	1151.46
39	Male	22	Tempo	65BPM	#FF00FF00	4124.41	#FF00CC00	946.054
40	Female	22	Tempo	65BPM	#FFFFA500	6828.56	#FFFFD37F	3545.2
41	Female	24	Tempo	65BPM	#FF0000FF	3715.7	#FF0000FF	2400.18
42	Male	46	Tempo	65BPM	#FF0000FF	2189.88	#FF000099	3695.52
43	Male	38	Tempo	65BPM	#FF0000FF	2902.32	#FF000099	2500.25
44	Female	24	Tempo	65BPM	#FFFF0000	1192.81	#FFFF0000	7072.4
45	Male	22	Tempo	65BPM	#FF00FF00	2062.12	#FF00CC00	1180.71
46	Female	23	Tempo	65BPM	#FFFFA500	4221.41	#FFCC8500	6699.38
47	Male	24	Tempo	65BPM	#FFFF00FF	1435.25	#FFFFB3FF	1584.09
48	Male	25	Tempo	65BPM	#FF0000FF	4938.64	#FF000066	2087.48
49	Female	24	Tempo	65BPM	#FF00FF00	5517.03	#FFB3FFB3	3023.49
50	Female	23	Tempo	65BPM	#FF0000FF	6378.52	#FF000099	930.384
51	Male	24	Tempo	65BPM	#FF00FF00	7883.93	#FF00FF00	5343.93
52	Male	53	Tempo	65BPM	#FF0000FF	11509.8	#FF000099	2591.72
1	Male	24	Pitch	C5	#FF00FFFF	3205.63	#FFE6FFFF	2816.04
2	Male	20	Pitch	C5	#FF00FF00	2206.9	#FF00CC00	1573.07
3	Male	23	Pitch	C5	#FFFFFF00	2960.07	#FFFFFFE6	2848.07
4	Male	37	Pitch	C5	#FFFFFF00	5367.03	#FFFFFFB3	4787.07
5	Male	22	Pitch	C5	#FFFF0000	3227.22	#FFCC0000	2386.07
6	Female	25	Pitch	C5	#FFFFFF00	2313.3	#FFFFFFB3	2632.15
7	Female	22	Pitch	C5	#FFFF0000	2248.33	#FFFF0000	818.002
8	Male	22	Pitch	C5	#FF00FF00	3507.37	#FF00CC00	2072.12
9	Male	21	Pitch	C5	#FFFFFF00	3409.2	#FFFFFF00	1905.11
10	Male	21	Pitch	C5	#FFFFFF00	3358.62	#FFFFFFB3	1543.97
11	Female	23	Pitch	C5	#FF00FFFF	2171.53	#FFB3FFFF	1057.76
12	Female	34	Pitch	C5	#FF0000FF	2407.73	#FF0000FF	1084.4
13	Female	24	Pitch	C5	#FFFF0000	4580.25	#FFFF0000	3711.93
14	Female	24	Pitch	C5	#FFFF0000	2579.2	#FFFF0000	3464.2
15	Female	23	Pitch	C5	#FFFFFF00	4314.42	#FFFFFF00	1825.1
16	Male	27	Pitch	C5	#FF00FFFF	3693.55	#FFE6FFFF	10768.6
17	Male	23	Pitch	C5	#FF00FFFF	3812.9	#FF00CCCC	1663.21
18	Female	51	Pitch	C5	#FFFF0000	2358.27	#FFCC0000	6696.72
19	Female	39	Pitch	C5	#FF00FF00	5708.23	#FF00CC00	2072.6
20	Female	38	Pitch	C5	#FF00FFFF	1514.23	#FF009999	608.255
21	Male	22	Pitch	C5	#FFFFFF00	1666.12	#FFFFFF7F	607.855
22	Female	42	Pitch	C5	#FFFFFF00	4667.44	#FFFFFF00	1684.1
23	Female	23	Pitch	C5	#FFFF0000	3284.36	#FFFF0000	1984.11
24	Female	42	Pitch	C5	#FFFF0000	5896.91	#FF990000	789.149
25	Female	23	Pitch	C5	#FFFFFF00	4851.24	#FFFFFF00	26547.1
26	Female	52	Pitch	C5	#FFFF0000	3066.21	#FFCC0000	5555.07
27	Female	50	Pitch	C5	#FF00FFFF	3688.11	#FF006666	3399.07
28	Male	25	Pitch	C5	#FFFF00FF	5038.93	#FF660066	5159.43
29	Male	25	Pitch	C5	#FFFF00FF	4482.21	#FFFF00FF	3024.07
30	Female	45	Pitch	C5	#FFFF0000	4693.12	#FFFF0000	4278.07
31	Male	25	Pitch	C5	#FFFF0000	3824.55	#FFFF0000	1383.08
32	Male	23	Pitch	C5	#FFFFFF00	3776.1	#FFFFFFE6	6263.07
33	Male	26	Pitch	C5	#FFFF0000	2821.22	#FFCC0000	145.008
34	Female	34	Pitch	C5	#FF00FFFF	4699.73	#FF00FFFF	1512.3
35	Female	23	Pitch	C5	#FFFF00FF	5702.85	#FFFF7FFF	3774.75
36	Male	24	Pitch	C5	#FFFFFF00	2210.65	#FFFFFF00	840.938
37	Female	24	Pitch	C5	#FFFF0000	3196.09	#FFFF0000	2093.06
38	Male	23	Pitch	C5	#FFFFFF00	2461.74	#FFFFFF00	1526.88
39	Male	22	Pitch	C5	#FFFF0000	2645.32	#FFFF0000	1847.11
40	Female	22	Pitch	C5	#FF00FF00	3650.33	#FFE6FFE6	2926.17
41	Female	24	Pitch	C5	#FFFF00FF	2690.25	#FFFFB3FF	1696.6
42	Male	46	Pitch	C5	#FFFFFF00	2884.83	#FFFFFF00	2167.96
43	Male	38	Pitch	C5	#FFFFA500	3019.56	#FFFFA500	3431.62
44	Female	24	Pitch	C5	#FF00FFFF	4028.4	#FF7FFFFF	3240.18
45	Male	22	Pitch	C5	#FFFF00FF	3318.86	#FFFF00FF	2303.51
46	Female	23	Pitch	C5	#FF0000FF	3369.55	#FF000066	778.044
47	Male	24	Pitch	C5	#FFFFA500	2735.27	#FFFFA500	720.91
48	Male	25	Pitch	C5	#FFFF00FF	3155.39	#FFFF7FFF	1864.31
49	Female	24	Pitch	C5	#FF0000FF	3156.22	#FF000099	2424.05
50	Female	23	Pitch	C5	#FF00FF00	4556.31	#FF80FF7F	1227.07
51	Male	24	Pitch	C5	#FFFFA500	2324.77	#FFFD37F	1524.03
52	Male	53	Pitch	C5	#FF00FFFF	4845.1	#FF00FFFF	2519.21
1	Male	24	Pitch	C4	#FF0000FF	3091.19	#FFB3B3FF	1810.91
2	Male	20	Pitch	C4	#FFFFFF00	3264.94	#FFCCCC00	1434.07
3	Male	23	Pitch	C4	#FFFFFF00	2371.22	#FFFFFF7F	1927.07
4	Male	37	Pitch	C4	#FFFFFF00	3788.07	#FFFFFF7F	6782.07
5	Male	22	Pitch	C4	#FF0000FF	2761.1	#FF0000CC	2889.07
6	Female	25	Pitch	C4	#FF00FF00	2790.22	#FF80FF7F	1200.07
7	Female	22	Pitch	C4	#FF00FF00	3815.93	#FF00FF00	942.083
8	Male	22	Pitch	C4	#FF00FF00	5819.51	#FF00FF00	4160.24
9	Male	21	Pitch	C4	#FF0000FF	4032.4	#FF0000FF	4277.24
10	Male	21	Pitch	C4	#FF00FFFF	2859.25	#FF7FFFFF	2627.78
11	Female	23	Pitch	C4	#FFFF00FF	1356.34	#FFFF7FFF	3400.51
12	Female	34	Pitch	C4	#FF00FF00	2913.11	#FF00FF00	873.584
13	Female	24	Pitch	C4	#FFFF0000	3754.63	#FFFF0000	7063.57
14	Female	24	Pitch	C4	#FFFF0000	3953.57	#FFFF0000	1600.09
15	Female	23	Pitch	C4	#FF00FFFF	3045.92	#FF00FFFF	2694.16
16	Male	27	Pitch	C4	#FFFF00FF	1031.23	#FF990099	3008.17
17	Male	23	Pitch	C4	#FF0000FF	5286.83	#FF0000FF	2016.56
18	Female	51	Pitch	C4	#FFFFFF00	3079.13	#FFFFFF00	4748.92
19	Female	39	Pitch	C4	#FFFFFF00	4509.79	#FFFFFF7F	4167.37
20	Female	38	Pitch	C4	#FFFF00FF	3554.42	#FFFF7FFF	560.626
21	Male	22	Pitch	C4	#FFFFFF00	2585.67	#FFFFFF00	599.826
22	Female	42	Pitch	C4	#FF0000FF	1534.26	#FF0000FF	1232.07
23	Female	23	Pitch	C4	#FFFF0000	2234.9	#FFFFE6E6	1144.07
24	Female	42	Pitch	C4	#FFFF0000	3038	#FFFF7F7F	1110.73
25	Female	23	Pitch	C4	#FFFF00FF	4075.1	#FFCC00CC	20281.1
26	Female	52	Pitch	C4	#FFFFA500	2005.9	#FFFFA500	5733.07
27	Female	50	Pitch	C4	#FF0000FF	2752.07	#FF00FFFF	3836.07
28	Male	25	Pitch	C4	#FFFFFF00	5373.45	#FFFFFF00	5224.05
29	Male	25	Pitch	C4	#FF00FF00	5197.08	#FF00FF00	8508.07
30	Female	45	Pitch	C4	#FFFF0000	3083.1	#FFFF0000	6047.07
31	Male	25	Pitch	C4	#FFFF00FF	2616.32	#FF990099	7139.41
32	Male	23	Pitch	C4	#FF00FF00	5772.07	#FFB3FFB3	4230.07
33	Male	26	Pitch	C4	#FFFF0000	2713.1	#FF660000	3721.07
34	Female	34	Pitch	C4	#FF00FF00	4207.09	#FF00FF00	1104.14
35	Female	23	Pitch	C4	#FFFFFF00	3174.04	#FFFFFFB3	8760.02
36	Male	24	Pitch	C4	#FFFF0000	8676.25	#FFFF7F7F	3633.36
37	Female	24	Pitch	C4	#FFFFA500	2263.91	#FFFFA500	1399.06
38	Male	23	Pitch	C4	#FF00FFFF	2469.43	#FF7FFFFF	2015.48
39	Male	22	Pitch	C4	#FFFFA500	4685.42	#FFFFA500	1543.09
40	Female	22	Pitch	C4	#FF00FFFF	4879.45	#FF00FFFF	3288.19
41	Female	24	Pitch	C4	#FF00FFFF	6453.05	#FF00FFFF	3497.4
42	Male	46	Pitch	C4	#FF00FF00	3429.16	#FF00FF00	2422.8
43	Male	38	Pitch	C4	#FF00FFFF	4575.03	#FF00FFFF	3524.17
44	Female	24	Pitch	C4	#FF00FFFF	4890.82	#FFB3FFFF	4480.26
45	Male	22	Pitch	C4	#FFFFFF00	2036.71	#FFFFFF00	5518.46
46	Female	23	Pitch	C4	#FF00FFFF	2724.33	#FF006666	1098.06
47	Male	24	Pitch	C4	#FFFFFF00	2524.2	#FFFFFF00	2371.14
48	Male	25	Pitch	C4	#FFFF0000	2182.24	#FFFF0000	1263.9
49	Female	24	Pitch	C4	#FFFF00FF	1987.91	#FFFF7FFF	4000.4
50	Female	23	Pitch	C4	#FF00FFFF	5613.25	#FF006666	1078.14
51	Male	24	Pitch	C4	#FFFF00FF	2862.95	#FFFF7FFF	6286.01
52	Male	53	Pitch	C4	#FFFFA500	3437.3	#FFFFA500	2392.59
1	Male	24	Pitch	C3	#FFFFFF00	2143.12	#FFFFFF7F	1594.76
2	Male	20	Pitch	C3	#FFFFA500	3864.91	#FF664200	3621.07
3	Male	23	Pitch	C3	#FFFF0000	4590.1	#FF660000	1944.07
4	Male	37	Pitch	C3	#FF00FF00	3521.1	#FF00CC00	2664.07
5	Male	22	Pitch	C3	#FF0000FF	3260.1	#FF000099	143.008
6	Female	25	Pitch	C3	#FFFF0000	2145.29	#FF660000	888.051
7	Female	22	Pitch	C3	#FF00FF00	6147.12	#FF00FF00	4462.53
8	Male	22	Pitch	C3	#FFFFA500	3819.33	#FF996300	2200.13
9	Male	21	Pitch	C3	#FF0000FF	1577.26	#FF0000FF	1201.07
10	Male	21	Pitch	C3	#FFFF0000	1923.96	#FFCC0000	2195.87
11	Female	23	Pitch	C3	#FFFFA500	7793.12	#FF996300	1656.06
12	Female	34	Pitch	C3	#FF00FFFF	3153.53	#FF00FFFF	877.691
13	Female	24	Pitch	C3	#FFFFFF00	1780.23	#FFCCCC00	3256.47
14	Female	24	Pitch	C3	#FF00FF00	1522.26	#FF00CC00	3513.2
15	Female	23	Pitch	C3	#FF0000FF	1972.22	#FF0000FF	968.051
16	Male	27	Pitch	C3	#FF00FFFF	3583.38	#FF009999	2817.16
17	Male	23	Pitch	C3	#FFFFFF00	1524.98	#FF666600	1366.93
18	Female	51	Pitch	C3	#FFFF00FF	2611.92	#FFCC00CC	4087.86
19	Female	39	Pitch	C3	#FFFF0000	2943.65	#FF990000	5368.45
20	Female	38	Pitch	C3	#FF00FF00	3613.84	#FF80FF7F	3704.07
21	Male	22	Pitch	C3	#FF0000FF	2774.46	#FF0000FF	1232.36
22	Female	42	Pitch	C3	#FF00FFFF	3247.36	#FF009999	1809.1
23	Female	23	Pitch	C3	#FFFFFF00	2451.85	#FF666600	696.04
24	Female	42	Pitch	C3	#FF0000FF	1396.17	#FF0000CC	2440.59
25	Female	23	Pitch	C3	#FF00FFFF	1896.03	#FF009999	9086.08
26	Female	52	Pitch	C3	#FF00FFFF	2194.1	#FF00CCCC	1732.07
27	Female	50	Pitch	C3	#FFFFA500	3087.12	#FF664200	2656.07
28	Male	25	Pitch	C3	#FF0000FF	3742.28	#FF0000FF	2607.82
29	Male	25	Pitch	C3	#FFFFFF00	4529.1	#FFFFFF00	2379.07
30	Female	45	Pitch	C3	#FF00FFFF	7442.11	#FF7FFFFF	1549.07
31	Male	25	Pitch	C3	#FFFFA500	5787.5	#FFFFD37F	1327.08
32	Male	23	Pitch	C3	#FF0000FF	5149.08	#FF000066	3952.07
33	Male	26	Pitch	C3	#FFFFFF00	5268.11	#FF999900	15222.1
34	Female	34	Pitch	C3	#FFFF0000	2508.83	#FF990000	704.002
35	Female	23	Pitch	C3	#FFFFA500	3579.15	#FFFFE5B3	3432.12
36	Male	24	Pitch	C3	#FF00FF00	5517.18	#FF009900	4169.16
37	Female	24	Pitch	C3	#FF0000FF	1502.07	#FF000099	812.047
38	Male	23	Pitch	C3	#FF00FFFF	2473.77	#FF009999	1240.34
39	Male	22	Pitch	C3	#FFFF0000	5629.49	#FF660000	2512.14
40	Female	22	Pitch	C3	#FFFFFF00	7506.66	#FF666600	4301.25
41	Female	24	Pitch	C3	#FFFF00FF	1891.22	#FF990099	6624.45
42	Male	46	Pitch	C3	#FFFF00FF	4611.44	#FFCC00CC	2777.49
43	Male	38	Pitch	C3	#FF00FFFF	1463.34	#FFE6FFFF	1257.59
44	Female	24	Pitch	C3	#FF00FFFF	4128.64	#FF7FFFFF	16616
45	Male	22	Pitch	C3	#FFFF00FF	2331.72	#FFFF7FFF	770.516
46	Female	23	Pitch	C3	#FF00FF00	2818.33	#FF009900	1734.1
47	Male	24	Pitch	C3	#FF0000FF	2148.13	#FF807FFF	951.054
48	Male	25	Pitch	C3	#FF00FF00	5139.21	#FF006600	1064.74
49	Female	24	Pitch	C3	#FF00FFFF	1091.55	#FF00CCCC	2168.01
50	Female	23	Pitch	C3	#FFFFA500	2979.9	#FF664200	1504.8
51	Male	24	Pitch	C3	#FFFFFF00	4890.2	#FF666600	2351.2
52	Male	53	Pitch	C3	#FFFFA500	4086.16	#FF664200	1223.93
1	Male	24	Pitch	C2	#FF00FF00	2096.45	#FF00FF00	2584.46
2	Male	20	Pitch	C2	#FF0000FF	2693.93	#FF000099	1716.07
3	Male	23	Pitch	C2	#FFFFA500	1982.1	#FF996300	2016.07
4	Male	37	Pitch	C2	#FF0000FF	5421.12	#FF000066	6731.07
5	Male	22	Pitch	C2	#FFFF00FF	3068.11	#FF660066	1621.07
6	Female	25	Pitch	C2	#FF00FFFF	1459.26	#FF009999	1000.06
7	Female	22	Pitch	C2	#FF0000FF	3109.18	#FF000099	1206.29
8	Male	22	Pitch	C2	#FFFFA500	3359.32	#FFCC8500	4023.23
9	Male	21	Pitch	C2	#FF0000FF	2966.34	#FF000099	1092.06
10	Male	21	Pitch	C2	#FFFFA500	5682.11	#FF996300	754.531
11	Female	23	Pitch	C2	#FF0000FF	2178.41	#FF000099	3520
12	Female	34	Pitch	C2	#FFFF00FF	2466.31	#FF990099	1955.94
13	Female	24	Pitch	C2	#FF0000FF	4189.13	#FF000066	1463.49
14	Female	24	Pitch	C2	#FF0000FF	2650.32	#FF000066	5780.33
15	Female	23	Pitch	C2	#FFFFA500	4084.42	#FF996300	1918.11
16	Male	27	Pitch	C2	#FF00FFFF	4318.24	#FF009999	4104.23
17	Male	23	Pitch	C2	#FF00FFFF	4507.55	#FF00CCCC	1320.63
18	Female	51	Pitch	C2	#FF00FF00	2106.03	#FF009900	2843.8
19	Female	39	Pitch	C2	#FFFFFF00	5079.12	#FF999900	6417.12
20	Female	38	Pitch	C2	#FF0000FF	2465.86	#FF000099	2343.43
21	Male	22	Pitch	C2	#FF0000FF	2178.22	#FF0000CC	912.039
22	Female	42	Pitch	C2	#FFFFFF00	2911.33	#FFFFFFB3	4366.25
23	Female	23	Pitch	C2	#FF0000FF	5401.62	#FF000066	12184.7
24	Female	42	Pitch	C2	#FFFFA500	3086.43	#FFFFD37F	1185.36
25	Female	23	Pitch	C2	#FF0000FF	4012.1	#FF000099	3717.07
26	Female	52	Pitch	C2	#FF00FFFF	2283.07	#FF009999	2631.07
27	Female	50	Pitch	C2	#FF00FF00	4786.12	#FF006600	3388.07
28	Male	25	Pitch	C2	#FF00FFFF	2719.56	#FF00CCCC	16082.4
29	Male	25	Pitch	C2	#FFFFA500	5439.03	#FFCC8500	4293.07
30	Female	45	Pitch	C2	#FF0000FF	4265.1	#FF000066	2718.07
31	Male	25	Pitch	C2	#FF0000FF	2834.33	#FFB3B3FF	2447.14
32	Male	23	Pitch	C2	#FFFFA500	3571.03	#FF664200	5099.07
33	Male	26	Pitch	C2	#FF00FFFF	4337.12	#FF009999	13114.1
34	Female	34	Pitch	C2	#FFFFA500	3435.49	#FF996300	1465.28
35	Female	23	Pitch	C2	#FF00FFFF	5494.24	#FFB3FFFF	4710.6
36	Male	24	Pitch	C2	#FFFFFF00	1886.17	#FFCCCC00	2999.61
37	Female	24	Pitch	C2	#FFFFA500	5223.12	#FF996300	7635.07
38	Male	23	Pitch	C2	#FF0000FF	2331.56	#FF000066	959.981
39	Male	22	Pitch	C2	#FF00FF00	2126.29	#FF009900	2320.13
40	Female	22	Pitch	C2	#FFFF00FF	2889.28	#FFCC00CC	3576.2
41	Female	24	Pitch	C2	#FFFFA500	2503.03	#FFFFA500	3600.11
42	Male	46	Pitch	C2	#FFFFA500	6156.42	#FFCC8500	1376.38
43	Male	38	Pitch	C2	#FF0000FF	2540.9	#FF0000FF	718.88
44	Female	24	Pitch	C2	#FF0000FF	3697.56	#FF000099	2880.16
45	Male	22	Pitch	C2	#FFFF0000	5359.12	#FF990000	3173.83
46	Female	23	Pitch	C2	#FFFFA500	3864.22	#FFCC8500	830.047
47	Male	24	Pitch	C2	#FFFFA500	2558.26	#FF996300	1673.1
48	Male	25	Pitch	C2	#FF00FFFF	4964.65	#FF00CCCC	2174.55
49	Female	24	Pitch	C2	#FFFFA500	3227.71	#FF996300	2776.96
50	Female	23	Pitch	C2	#FF0000FF	4252.41	#FF000066	1030.8
51	Male	24	Pitch	C2	#FFFF00FF	4945.29	#FF990099	2258.01
51	Male	24	Pitch	C2	#FFFFA500	5942.62	#FF664200	1943.76
